# Supplementary material for: Universally high transcript error rates in bacteria
Source: eLife. 2020 May 29;9:e54898. doi: 10.7554/eLife.54898 (PMC7259958; doi:10.7554/eLife.54898)
Supplement: Supplementary file 1. — Estimates of transcript indel error rates of four bacterial species. Standard error of the mean from three biological replicates are displayed. Supplementary Table 2—5. The Observed and expected numbers of transcript errors in genes of four bacterial species. Supplementary Table 6. The transition/transversion error bias revealed in four bacterial species. Supplementary Table 7. The observed and expected numbers/percentages of transcript errors that are synonymous, nonsynonymous, or nonsense. Supplementary Table 8. The numbers and rates of detected transcript errors that are from ncRNA transcripts in four bacterial species. [file elife-54898-supp1.xlsx]

## Sheet: Table 1. indel error rates
Species	Transcript indel error rate (per nucleotide)
E. coli	8.77 ± 0.72 × 10-7
B. subtilis	1.05 ± 0.03 × 10-6
A. tumefaciens	9.38 ± 0.44 × 10-7
M. florum	3.42 ± 0.13 × 10-6

## Sheet: Table 2. Hotspot_E.coli
Biological replicate 1							Biological replicate 2							Biological replicate 2
				p-value after Bonferroni correction:	0.000130548						p-value after Bonferroni correction:	0.000134771						p-value after Bonferroni correction:	0.000147059		The number of hotspot genes supported by at least two replicates: 1
Gene_ID	Coverage	Expected number of transcription errors	Observed number of transcription errors	Poisson cumulative probability of >= observed transcriptional errors in the gene	Significant		Gene_ID	Coverage	Expected number of transcription errors	Observed number of transcription errors	Poisson cumulative probability of >= observed transcriptional errors in the gene	Significant		Gene_ID	Coverage	Expected number of transcription errors	Observed number of transcription errors	Poisson cumulative probability of >= observed transcriptional errors in the gene	Significant
NC_000913.3:3720048-3720261(+)	901275	5.26345	21	1.85969e-07	Yes		NC_000913.3:3720048-3720261(+)	1230997	7.18902	27	1.25349e-08	Yes		NC_000913.3:4175943-4177128(+)	519462	3.03366	12	7.91655e-05	Yes
NC_000913.3:2737153-2737495(+)	2098322	12.2542	28	7.89806e-05	Yes		NC_000913.3:657291-657501(+)	109821	0.641355	13	2.75335e-13	Yes		NC_000913.3:3720048-3720261(+)	582337	3.40085	24	3.56049e-13	Yes
NC_000913.3:461450-461723(+)	322259	1.88199	1	0.847714	No		NC_000913.3:461450-461723(+)	214615	1.25335	1	0.714454	No		NC_000913.3:461450-461723(+)	234958	1.37215	2	0.398516	No
NC_000913.3:4103601-4104975(-)	15801	0.0922778	1	0.0881482	No		NC_000913.3:3921235-3922051(-)	94734	0.553247	1	0.42492	No		NC_000913.3:3071458-3072622(-)	612104	3.57469	2	0.871798	No
NC_000913.3:1656183-1656744(+)	6772	0.0395485	1	0.0387766	No		NC_000913.3:3071458-3072622(-)	1185411	6.9228	7	0.538724	No		NC_000913.3:3722327-3724397(-)	354201	2.06853	2	0.612227	No
NC_000913.3:1314019-1314658(+)	84754	0.494963	1	0.390407	No		NC_000913.3:3486790-3488893(+)	72925	0.425882	1	0.346807	No		NC_000913.3:4480981-4483837(-)	97541	0.569639	1	0.434271	No
NC_000913.3:3071458-3072622(-)	853667	4.98542	6	0.38148	No		NC_000913.3:3722327-3724397(-)	316573	1.84879	2	0.551521	No		NC_000913.3:4436754-4437495(+)	9268	0.0541251	1	0.0526864	No
NC_000913.3:3790319-3791345(-)	101062	0.590202	1	0.445785	No		NC_000913.3:3573774-3574878(-)	54927	0.320774	1	0.274413	No		NC_000913.3:1247695-1249114(-)	414446	2.42036	4	0.225544	No
NC_000913.3:1304753-1305767(+)	155798	0.90986	2	0.231128	No		NC_000913.3:141430-141967(+)	13897	0.0811585	1	0.0779524	No		NC_000913.3:3893880-3894630(+)	40182	0.234663	1	0.209163	No
NC_000913.3:3486790-3488893(+)	74050	0.432452	1	0.351084	No		NC_000913.3:3400043-3401087(-)	88355	0.515993	1	0.403093	No		NC_000913.3:4107551-4108514(+)	321374	1.87682	1	0.846925	No
NC_000913.3:1249124-1249757(-)	117762	0.68773	1	0.497284	No		NC_000913.3:4024987-4026481(+)	66860	0.390462	1	0.323256	No		NC_000913.3:2269978-2270545(+)	241416	1.40987	3	0.168892	No
NC_000913.3:3722327-3724397(-)	365129	2.13235	2	0.628635	No		NC_000913.3:1247695-1249114(-)	255571	1.49253	1	0.775198	No		NC_000913.3:2433011-2433926(-)	84486	0.493398	1	0.389452	No
NC_000913.3:1907447-1907591(-)	235989	1.37818	1	0.747962	No		NC_000913.3:4107551-4108514(+)	370864	2.16585	2	0.637027	No		NC_000913.3:1903081-1903882(+)	95555	0.558041	1	0.427671	No
NC_000913.3:3573774-3574878(-)	90600	0.529104	1	0.410867	No		NC_000913.3:2269978-2270545(+)	305883	1.78636	2	0.533091	No		NC_000913.3:787796-788837(-)	120579	0.704181	1	0.505487	No
NC_000913.3:1192666-1193773(-)	25614	0.149586	1	0.138935	No		NC_000913.3:1903081-1903882(+)	133009	0.776773	1	0.540112	No		NC_000913.3:3053514-3054840(-)	63327	0.36983	1	0.309148	No
NC_000913.3:3884335-3884476(+)	104773	0.611874	3	0.0243046	No		NC_000913.3:2175058-2176321(-)	2376486	13.8787	16	0.318693	No		NC_000913.3:1066863-1067091(-)	16508	0.0964067	1	0.0919054	No
NC_000913.3:1727836-1728244(+)	37954	0.221651	1	0.198805	No		NC_000913.3:3141285-3142989(-)	209113	1.22122	1	0.70513	No		NC_000913.3:2175058-2176321(-)	1728574	10.0949	7	0.875728	No
NC_000913.3:4024987-4026481(+)	79938	0.466838	1	0.373018	No		NC_000913.3:3035183-3036206(-)	123918	0.723681	1	0.515036	No		NC_000913.3:3040803-3041070(-)	28978	0.169232	1	0.155687	No
NC_000913.3:1247695-1249114(-)	477416	2.78811	1	0.938463	No		NC_000913.3:1799801-1799999(-)	335217	1.95767	5	0.0489144	No		NC_000913.3:261502-262756(+)	65242	0.381013	1	0.316831	No
NC_000913.3:1368078-1368747(+)	11510	0.0672184	1	0.065009	No		NC_000913.3:3974466-3975141(+)	2400	0.014016	1	0.0139182	No		NC_000913.3:3035183-3036206(-)	99408	0.580543	1	0.440405	No
NC_000913.3:2433011-2433926(-)	71262	0.41617	3	0.00882163	No		NC_000913.3:3917401-3918265(-)	233058	1.36106	1	0.743611	No		NC_000913.3:1799801-1799999(-)	380606	2.22274	3	0.383377	No
NC_000913.3:787796-788837(-)	145734	0.851087	1	0.573049	No		NC_000913.3:1742600-1743242(-)	48770	0.284817	1	0.247848	No		NC_000913.3:3532817-3534440(+)	647536	3.78161	5	0.328584	No
NC_000913.3:2175058-2176321(-)	2192264	12.8028	11	0.731002	No		NC_000913.3:1151614-1151851(+)	812137	4.74288	3	0.851954	No		NC_000913.3:3936277-3937168(+)	128740	0.751842	2	0.174011	No
NC_000913.3:2296361-2297024(-)	6364	0.0371658	1	0.0364836	No		NC_000913.3:2707797-2708754(-)	152789	0.892288	1	0.590283	No		NC_000913.3:3917401-3918265(-)	224909	1.31347	3	0.146	No
NC_000913.3:3141285-3142989(-)	203441	1.1881	2	0.333066	No		NC_000913.3:3966416-3967676(+)	425761	2.48644	5	0.107018	No		NC_000913.3:4046965-4049752(+)	56512	0.33003	1	0.281098	No
NC_000913.3:3035183-3036206(-)	89890	0.524958	2	0.0978649	No		NC_000913.3:2549645-2550545(-)	212489	1.24094	1	0.710886	No		NC_000913.3:1547400-1550448(+)	293904	1.7164	2	0.51183	No
NC_000913.3:1799801-1799999(-)	354317	2.06921	1	0.873715	No		NC_000913.3:3442114-3442471(-)	233139	1.36153	1	0.743732	No		NC_000913.3:3332861-3333119(-)	153089	0.89404	1	0.591	No
NC_000913.3:3532817-3534440(+)	788080	4.60239	2	0.94382	No		NC_000913.3:985893-986982(-)	773859	4.51934	6	0.300376	No		NC_000913.3:1151614-1151851(+)	788175	4.60294	2	0.943846	No
NC_000913.3:3936277-3937168(+)	207868	1.21395	2	0.342408	No		NC_000913.3:3885075-3886722(+)	176956	1.03342	1	0.644213	No		NC_000913.3:2549645-2550545(-)	229153	1.33825	2	0.386668	No
NC_000913.3:3917401-3918265(-)	276110	1.61248	4	0.0805433	No		NC_000913.3:3964364-3965630(-)	113804	0.664615	2	0.143603	No		NC_000913.3:3494010-3496554(+)	1859583	10.86	8	0.847533	No
NC_000913.3:3328238-3328715(-)	34256	0.200055	2	0.0175321	No		NC_000913.3:8237-9191(+)	771749	4.50701	1	0.988969	No		NC_000913.3:2355520-2356711(+)	630989	3.68498	5	0.309882	No
NC_000913.3:1547400-1550448(+)	205034	1.1974	1	0.698021	No		NC_000913.3:2827736-2828516(+)	300930	1.75743	1	0.827513	No		NC_000913.3:985893-986982(-)	911021	5.32036	4	0.777101	No
NC_000913.3:1151614-1151851(+)	810152	4.73129	4	0.695213	No		NC_000913.3:3532817-3534440(+)	742274	4.33488	7	0.148394	No		NC_000913.3:3885075-3886722(+)	69381	0.405185	1	0.333147	No
NC_000913.3:3494010-3496554(+)	1323671	7.73024	5	0.883846	No		NC_000913.3:2638662-2639283(-)	61703	0.360346	1	0.302565	No		NC_000913.3:3964364-3965630(-)	98449	0.574942	1	0.437263	No
NC_000913.3:2141633-2142215(-)	22454	0.131131	1	0.122897	No		NC_000913.3:203347-204496(+)	38703	0.226026	1	0.202302	No		NC_000913.3:4019623-4020229(+)	18253	0.106598	1	0.101113	No
NC_000913.3:985893-986982(-)	1199471	7.00491	4	0.91849	No		NC_000913.3:2736145-2736883(+)	137930	0.805511	2	0.19319	No		NC_000913.3:8237-9191(+)	770479	4.4996	8	0.0865533	No
NC_000913.3:3885075-3886722(+)	83847	0.489666	2	0.0870866	No		NC_000913.3:2097320-2098301(-)	86484	0.505067	1	0.396535	No		NC_000913.3:2634231-2635602(+)	40237	0.234984	1	0.209417	No
NC_000913.3:3964364-3965630(-)	124676	0.728108	2	0.165632	No		NC_000913.3:3311414-3311684(-)	220773	1.28931	2	0.369386	No		NC_000913.3:136569-136917(-)	33140	0.193538	1	0.175961	No
NC_000913.3:3989824-3990766(-)	116325	0.679338	3	0.0316761	No		NC_000913.3:2354264-2355524(+)	426728	2.49209	5	0.107768	No		NC_000913.3:2867613-2868753(-)	166227	0.970766	1	0.621207	No
NC_000913.3:4425519-4425834(+)	50731	0.296269	1	0.256413	No		NC_000913.3:3599928-3600783(-)	755021	4.40932	4	0.642175	No		NC_000913.3:2744182-2744530(-)	101970	0.595505	2	0.120423	No
NC_000913.3:8237-9191(+)	808964	4.72435	2	0.949188	No		NC_000913.3:3617014-3617779(+)	9819	0.057343	1	0.0557298	No		NC_000913.3:4391603-4392149(+)	12446	0.0726846	1	0.070106	No
NC_000913.3:1285848-1286526(+)	71301	0.416398	2	0.0660019	No		NC_000913.3:4379782-4380517(-)	330881	1.93235	3	0.305018	No		NC_000913.3:2171832-2172873(-)	351897	2.05508	2	0.608697	No
NC_000913.3:4428078-4428717(-)	10241	0.0598074	1	0.0580541	No		NC_000913.3:3376278-3376776(-)	85250	0.49786	1	0.39217	No		NC_000913.3:3311414-3311684(-)	227445	1.32828	3	0.149449	No
NC_000913.3:2638662-2639283(-)	49272	0.287748	2	0.0342528	No		NC_000913.3:2107225-2108329(-)	9395	0.0548668	1	0.0533888	No		NC_000913.3:2354264-2355524(+)	546676	3.19259	4	0.39583	No
NC_000913.3:203347-204496(+)	30041	0.175439	2	0.0137026	No		NC_000913.3:1151938-1153180(+)	381415	2.22746	1	0.892198	No		NC_000913.3:3599928-3600783(-)	457483	2.6717	1	0.930865	No
NC_000913.3:2867613-2868753(-)	175446	1.0246	1	0.641062	No		NC_000913.3:2173364-2174278(-)	1230618	7.18681	3	0.97427	No		NC_000913.3:1151938-1153180(+)	355374	2.07538	1	0.874492	No
NC_000913.3:2736145-2736883(+)	126590	0.739286	3	0.0390947	No		NC_000913.3:2827361-2827733(+)	141241	0.824847	2	0.200166	No		NC_000913.3:2173364-2174278(-)	695004	4.05882	3	0.77039	No
NC_000913.3:2744182-2744530(-)	102916	0.601029	2	0.12224	No		NC_000913.3:2637473-2638652(-)	70800	0.413472	1	0.33865	No		NC_000913.3:2404628-2405072(-)	94690	0.55299	1	0.424772	No
NC_000913.3:4249553-4250474(+)	61605	0.359773	1	0.302165	No		NC_000913.3:3377814-3378207(-)	293354	1.71319	5	0.0304607	No		NC_000913.3:4056624-4058034(-)	174316	1.01801	1	0.638685	No
NC_000913.3:2171832-2172873(-)	594681	3.47294	5	0.269455	No		NC_000913.3:4380509-4382318(-)	1872100	10.9331	14	0.212549	No		NC_000913.3:4380509-4382318(-)	1098370	6.41448	3	0.954166	No
NC_000913.3:2354264-2355524(+)	657767	3.84136	1	0.978536	No		NC_000913.3:188711-189506(-)	36401	0.212582	1	0.191506	No		NC_000913.3:641438-641867(-)	20948	0.122336	1	0.115149	No
NC_000913.3:3599928-3600783(-)	529058	3.0897	1	0.954484	No		NC_000913.3:4470526-4470913(-)	103248	0.602968	1	0.452815	No		NC_000913.3:4181244-4185273(+)	967404	5.64964	7	0.337618	No
NC_000913.3:1924594-1924969(-)	11908	0.0695427	1	0.0671797	No		NC_000913.3:4181244-4185273(+)	626891	3.66104	3	0.707915	No		NC_000913.3:3448567-3448759(-)	88335	0.515876	3	0.0156201	No
NC_000913.3:4379782-4380517(-)	350080	2.04447	3	0.335358	No		NC_000913.3:3448567-3448759(-)	31594	0.184509	1	0.168488	No		NC_000913.3:3562012-3563518(+)	561641	3.27998	2	0.838949	No
NC_000913.3:3376278-3376776(-)	82308	0.480679	1	0.381636	No		NC_000913.3:3562012-3563518(+)	277151	1.61856	1	0.801816	No		NC_000913.3:1051460-1051673(+)	129834	0.758231	1	0.531505	No
NC_000913.3:2173364-2174278(-)	1108407	6.4731	8	0.323312	No		NC_000913.3:4058406-4060230(+)	187447	1.09469	2	0.299026	No		NC_000913.3:1800095-1800638(-)	583920	3.41009	3	0.662203	No
NC_000913.3:922365-922590(-)	84312	0.492382	1	0.388831	No		NC_000913.3:4261668-4262706(+)	19617	0.114563	1	0.108244	No		NC_000913.3:4404686-4405985(+)	276629	1.61551	2	0.480066	No
NC_000913.3:2750114-2750708(-)	183435	1.07126	1	0.657424	No		NC_000913.3:1051460-1051673(+)	279138	1.63017	2	0.484758	No		NC_000913.3:3439615-3439999(-)	488787	2.85452	1	0.942416	No
NC_000913.3:4380509-4382318(-)	2037002	11.8961	16	0.148161	No		NC_000913.3:1800095-1800638(-)	662641	3.86982	2	0.898405	No		NC_000913.3:1822457-1823285(+)	18359	0.107217	1	0.101669	No
NC_000913.3:777739-779032(+)	101313	0.591668	2	0.119165	No		NC_000913.3:1720389-1720824(-)	27768	0.162165	1	0.149699	No		NC_000913.3:1277956-1279348(+)	275594	1.60947	2	0.478122	No
NC_000913.3:4181244-4185273(+)	844300	4.93071	6	0.371884	No		NC_000913.3:4404686-4405985(+)	226281	1.32148	2	0.380768	No		NC_000913.3:3784190-3784442(-)	63772	0.372428	2	0.0543159	No
NC_000913.3:3448567-3448759(-)	68611	0.400688	1	0.330141	No		NC_000913.3:3439615-3439999(-)	247075	1.44292	2	0.422891	No		NC_000913.3:1388304-1388811(-)	82787	0.483476	1	0.383364	No
NC_000913.3:3562012-3563518(+)	562363	3.2842	3	0.637391	No		NC_000913.3:1903894-1904746(+)	176012	1.02791	2	0.274507	No		NC_000913.3:3039854-3040376(+)	18635	0.108828	1	0.103116	No
NC_000913.3:1051460-1051673(+)	223043	1.30257	2	0.374088	No		NC_000913.3:3308039-3308924(-)	491068	2.86784	2	0.780223	No		NC_000913.3:3263685-3265017(-)	277936	1.62315	2	0.482513	No
NC_000913.3:1800095-1800638(-)	558264	3.26026	2	0.836498	No		NC_000913.3:2231843-2232728(+)	190377	1.1118	1	0.671034	No		NC_000913.3:662378-662642(-)	7757	0.0453009	1	0.0442901	No
NC_000913.3:4404686-4405985(+)	248247	1.44976	2	0.425222	No		NC_000913.3:3263685-3265017(-)	1049803	6.13085	8	0.274223	No		NC_000913.3:2174596-2175049(-)	559847	3.26951	3	0.634413	No
NC_000913.3:3439615-3439999(-)	333429	1.94723	1	0.857331	No		NC_000913.3:2174596-2175049(-)	810294	4.73212	5	0.511316	No		NC_000913.3:2708753-2709404(-)	244639	1.42869	1	0.760378	No
NC_000913.3:2552351-2553221(+)	12143	0.0709151	1	0.068459	No		NC_000913.3:495119-496994(+)	50853	0.296982	1	0.256942	No		NC_000913.3:3383329-3384268(-)	464692	2.7138	4	0.288953	No
NC_000913.3:1277956-1279348(+)	82106	0.479499	1	0.380907	No		NC_000913.3:2708753-2709404(-)	425231	2.48335	4	0.238871	No		NC_000913.3:3446152-3446545(-)	231318	1.3509	2	0.391099	No
NC_000913.3:1388304-1388811(-)	60443	0.352987	1	0.297414	No		NC_000913.3:3383329-3384268(-)	387226	2.2614	2	0.660147	No		NC_000913.3:2826391-2827351(+)	216454	1.26409	1	0.717504	No
NC_000913.3:1676370-1677903(-)	39425	0.230242	1	0.205659	No		NC_000913.3:4259487-4260003(-)	42876	0.250396	1	0.221507	No		NC_000913.3:3441708-3442098(-)	515864	3.01265	4	0.355601	No
NC_000913.3:3308039-3308924(-)	483695	2.82478	1	0.940678	No		NC_000913.3:3441708-3442098(-)	347294	2.0282	1	0.868427	No		NC_000913.3:951271-953554(-)	4578417	26.738	33	0.133758	No
NC_000913.3:3263685-3265017(-)	562524	3.28514	9	0.00672265	No		NC_000913.3:951271-953554(-)	5295407	30.9252	31	0.518535	No		NC_000913.3:3920949-3921189(-)	9578	0.0559355	1	0.0543999	No
NC_000913.3:2174596-2175049(-)	760761	4.44284	4	0.647969	No		NC_000913.3:3451680-3452286(-)	597097	3.48705	1	0.969409	No		NC_000913.3:3451680-3452286(-)	1005895	5.87443	7	0.373536	No
NC_000913.3:495119-496994(+)	90232	0.526955	1	0.4096	No		NC_000913.3:3452296-3452926(-)	416006	2.42948	3	0.437973	No		NC_000913.3:4082771-4085822(-)	73638	0.430046	1	0.349521	No
NC_000913.3:2708753-2709404(-)	291754	1.70384	1	0.818017	No		NC_000913.3:2495644-2496565(+)	97507	0.569441	1	0.434158	No		NC_000913.3:123016-125680(+)	155793	0.909831	3	0.0644854	No
NC_000913.3:3383329-3384268(-)	550164	3.21296	4	0.400364	No		NC_000913.3:1737455-1737545(-)	49835	0.291036	1	0.252512	No		NC_000913.3:3785259-3786804(+)	506669	2.95895	2	0.794636	No
NC_000913.3:3563786-3564005(-)	22376	0.130676	1	0.122498	No		NC_000913.3:4634440-4635310(-)	102272	0.597268	2	0.121003	No		NC_000913.3:3452296-3452926(-)	458996	2.68054	2	0.747786	No
NC_000913.3:2826391-2827351(+)	150798	0.88066	3	0.0597103	No		NC_000913.3:4358696-4360031(-)	102951	0.601234	3	0.0232373	No		NC_000913.3:3322732-3324070(-)	77749	0.454054	2	0.0766053	No
NC_000913.3:4259487-4260003(-)	40411	0.236	1	0.21022	No		NC_000913.3:2639300-2640575(-)	143101	0.83571	2	0.204098	No		NC_000913.3:3758016-3759861(-)	18076	0.105564	1	0.100183	No
NC_000913.3:3441708-3442098(-)	424451	2.47879	5	0.106007	No		NC_000913.3:3474177-3474552(-)	453249	2.64697	3	0.493298	No		NC_000913.3:3911838-3913668(-)	153408	0.895903	1	0.591761	No
NC_000913.3:951271-953554(-)	4695717	27.423	27	0.557686	No		NC_000913.3:2722726-2724082(+)	84343	0.492563	1	0.388942	No		NC_000913.3:3072671-3073691(-)	256888	1.50023	2	0.44225	No
NC_000913.3:3451680-3452286(-)	820600	4.7923	6	0.347649	No		NC_000913.3:3449181-3449883(-)	326542	1.90701	3	0.298171	No		NC_000913.3:3474177-3474552(-)	674083	3.93664	6	0.205048	No
NC_000913.3:2852135-2853257(+)	70396	0.411113	1	0.337088	No		NC_000913.3:3248968-3249337(+)	47831	0.279333	1	0.243712	No		NC_000913.3:1397671-1398622(-)	192623	1.12492	1	0.675321	No
NC_000913.3:3785259-3786804(+)	498715	2.9125	3	0.556922	No		NC_000913.3:200970-201996(+)	144436	0.843506	1	0.569801	No		NC_000913.3:2298268-2298718(-)	59933	0.350009	1	0.295318	No
NC_000913.3:710934-711465(-)	48678	0.28428	1	0.247444	No		NC_000913.3:3305970-3307860(-)	487764	2.84854	2	0.777059	No		NC_000913.3:131614-134212(+)	202051	1.17998	1	0.692714	No
NC_000913.3:3452296-3452926(-)	496178	2.89768	3	0.5535	No		NC_000913.3:1150669-1151404(+)	384570	2.24589	2	0.656476	No		NC_000913.3:710199-710646(-)	63006	0.367955	1	0.307852	No
NC_000913.3:1737455-1737545(-)	41434	0.241975	1	0.214924	No		NC_000913.3:2291357-2292410(-)	7805	0.0455812	1	0.044558	No		NC_000913.3:3305970-3307860(-)	266495	1.55633	1	0.789091	No
NC_000913.3:204492-205089(+)	14571	0.0850946	1	0.0815746	No		NC_000913.3:940958-943403(+)	381018	2.22515	1	0.891948	No		NC_000913.3:1150669-1151404(+)	432000	2.52288	3	0.462042	No
NC_000913.3:2639300-2640575(-)	109956	0.642143	1	0.473836	No		NC_000913.3:3442765-3444097(-)	800632	4.67569	9	0.0489613	No		NC_000913.3:3049572-3050667(-)	187139	1.09289	1	0.664754	No
NC_000913.3:3911838-3913668(-)	156592	0.914497	1	0.599282	No		NC_000913.3:690905-691784(-)	42789	0.249888	1	0.221112	No		NC_000913.3:940958-943403(+)	237268	1.38565	2	0.403201	No
NC_000913.3:3975145-3976276(+)	4605	0.0268932	1	0.0265348	No		NC_000913.3:662751-663963(-)	66144	0.386281	2	0.0579118	No		NC_000913.3:2530246-2531233(-)	127404	0.744039	1	0.524809	No
NC_000913.3:3072671-3073691(-)	304725	1.77959	1	0.831293	No		NC_000913.3:3322172-3322505(-)	264063	1.54213	1	0.786075	No		NC_000913.3:1799392-1799749(-)	691206	4.03664	4	0.573656	No
NC_000913.3:3474177-3474552(-)	486785	2.84282	6	0.068908	No		NC_000913.3:4133834-4136015(+)	379557	2.21661	2	0.649461	No		NC_000913.3:3442765-3444097(-)	1139320	6.65363	11	0.0757638	No
NC_000913.3:1990953-1991619(-)	11322	0.0661205	1	0.0639819	No		NC_000913.3:189873-190599(+)	546830	3.19349	3	0.618735	No		NC_000913.3:3547985-3550070(-)	48007	0.280361	1	0.244489	No
NC_000913.3:2722726-2724082(+)	71512	0.41763	1	0.341394	No		NC_000913.3:2355520-2356711(+)	529430	3.09187	5	0.200403	No		NC_000913.3:3322172-3322505(-)	227733	1.32996	1	0.735512	No
NC_000913.3:1397671-1398622(-)	170320	0.994669	3	0.0793234	No		NC_000913.3:200481-200967(+)	124169	0.725147	2	0.164592	No		NC_000913.3:4464758-4466180(-)	984303	5.74833	5	0.679846	No
NC_000913.3:3449181-3449883(-)	717035	4.18748	7	0.131109	No		NC_000913.3:3792825-3793683(-)	28922	0.168904	2	0.0127555	No		NC_000913.3:4133834-4136015(+)	561405	3.27861	3	0.636259	No
NC_000913.3:131614-134212(+)	176068	1.02824	1	0.642363	No		NC_000913.3:2600477-2600948(+)	123117	0.719003	1	0.512762	No		NC_000913.3:189873-190599(+)	957614	5.59247	6	0.48686	No
NC_000913.3:710199-710646(-)	54730	0.319623	2	0.0413957	No		NC_000913.3:1305763-1306768(+)	104482	0.610175	1	0.456744	No		NC_000913.3:1279863-1283607(+)	2406706	14.0552	13	0.646949	No
NC_000913.3:3305970-3307860(-)	469953	2.74453	4	0.295747	No		NC_000913.3:3249374-3249680(+)	26985	0.157592	1	0.145802	No		NC_000913.3:2600477-2600948(+)	120716	0.704981	1	0.505882	No
NC_000913.3:1150669-1151404(+)	393494	2.298	2	0.668686	No		NC_000913.3:3155354-3156518(+)	45917	0.268155	1	0.235211	No		NC_000913.3:2652493-2653339(+)	52963	0.309304	2	0.0390263	No
NC_000913.3:940958-943403(+)	359194	2.09769	2	0.619791	No		NC_000913.3:2908028-2909666(-)	404622	2.36299	3	0.420593	No		NC_000913.3:3410279-3411245(+)	31857	0.186045	1	0.169764	No
NC_000913.3:1799392-1799749(-)	633424	3.6992	3	0.714431	No		NC_000913.3:2176349-2177204(-)	1422004	8.3045	8	0.588677	No		NC_000913.3:2908028-2909666(-)	299619	1.74977	1	0.826187	No
NC_000913.3:690905-691784(-)	21454	0.125291	2	0.00722316	No		NC_000913.3:4245228-4246419(-)	244490	1.42782	3	0.173265	No		NC_000913.3:2176349-2177204(-)	1350098	7.88457	6	0.79796	No
NC_000913.3:662751-663963(-)	37698	0.220156	1	0.197607	No		NC_000913.3:3448313-3448568(-)	227835	1.33056	1	0.73567	No		NC_000913.3:3440039-3441029(-)	1088379	6.35613	5	0.759793	No
NC_000913.3:3322172-3322505(-)	226723	1.32406	1	0.733948	No		NC_000913.3:2519256-2520672(-)	123751	0.722706	1	0.514563	No		NC_000913.3:127911-129336(+)	264215	1.54302	1	0.786264	No
NC_000913.3:4133834-4136015(+)	548825	3.20514	3	0.621168	No		NC_000913.3:3317553-3318006(-)	198264	1.15786	2	0.322092	No		NC_000913.3:4245228-4246419(-)	421280	2.46028	2	0.704453	No
NC_000913.3:189873-190599(+)	732395	4.27719	3	0.799766	No		NC_000913.3:2964360-2965155(-)	33927	0.198134	1	0.17974	No		NC_000913.3:2297656-2298259(-)	101213	0.591084	3	0.0222437	No
NC_000913.3:2355520-2356711(+)	756704	4.41915	3	0.817122	No		NC_000913.3:3325000-3326935(-)	350322	2.04588	2	0.60627	No		NC_000913.3:3448313-3448568(-)	596227	3.48197	6	0.140012	No
NC_000913.3:200481-200967(+)	144421	0.843419	1	0.569763	No		NC_000913.3:4371024-4372671(+)	399244	2.33158	4	0.207105	No		NC_000913.3:2535833-2536343(+)	256358	1.49713	1	0.776229	No
NC_000913.3:175106-176528(+)	8449	0.0493422	1	0.0481446	No		NC_000913.3:105304-106456(+)	285200	1.66557	1	0.810917	No		NC_000913.3:983074-983623(+)	47504	0.277423	1	0.242266	No
NC_000913.3:3933350-3933770(+)	25270	0.147577	1	0.137204	No		NC_000913.3:3445606-3446140(-)	495062	2.89116	4	0.3284	No		NC_000913.3:3450542-3451364(-)	1006576	5.8784	12	0.0174887	No
NC_000913.3:1733753-1734101(-)	13505	0.0788692	1	0.0758392	No		NC_000913.3:2765917-2766991(+)	33688	0.196738	1	0.178594	No		NC_000913.3:791038-792055(-)	174477	1.01895	1	0.639025	No
NC_000913.3:1279863-1283607(+)	1002915	5.85702	4	0.835574	No		NC_000913.3:3327789-3328083(+)	57185	0.33396	1	0.283918	No		NC_000913.3:3325000-3326935(-)	294742	1.72129	2	0.513338	No
NC_000913.3:2652493-2653339(+)	55698	0.325276	1	0.277672	No		NC_000913.3:1930456-1930747(-)	79598	0.464852	1	0.371772	No		NC_000913.3:4371024-4372671(+)	348209	2.03354	4	0.148979	No
NC_000913.3:3155354-3156518(+)	99584	0.581571	1	0.44098	No		NC_000913.3:12162-14079(+)	250101	1.46059	2	0.428899	No		NC_000913.3:105304-106456(+)	226262	1.32137	1	0.73323	No
NC_000913.3:2908028-2909666(-)	299914	1.7515	2	0.522577	No		NC_000913.3:2113433-2114327(-)	90527	0.528678	1	0.410616	No		NC_000913.3:2351015-2352374(-)	883012	5.15679	6	0.411529	No
NC_000913.3:2176349-2177204(-)	1559436	9.10711	2	0.998879	No		NC_000913.3:4375698-4376265(+)	125597	0.733486	2	0.167525	No		NC_000913.3:3445606-3446140(-)	447467	2.61321	1	0.926701	No
NC_000913.3:127911-129336(+)	210201	1.22757	2	0.347315	No		NC_000913.3:4118514-4118760(+)	159662	0.932426	1	0.606402	No		NC_000913.3:639752-641318(+)	74006	0.432195	1	0.350917	No
NC_000913.3:2431021-2431684(-)	14391	0.0840434	1	0.0806087	No		NC_000913.3:2716065-2716449(-)	1162245	6.78751	11	0.084126	No		NC_000913.3:244326-245094(+)	29692	0.173401	1	0.1592	No
NC_000913.3:4460521-4462660(-)	258698	1.5108	3	0.193868	No		NC_000913.3:2349934-2351011(-)	384876	2.24768	4	0.190102	No		NC_000913.3:3497827-3499201(+)	195452	1.14144	2	0.316112	No
NC_000913.3:3259720-3260110(-)	35941	0.209895	1	0.189331	No		NC_000913.3:4379376-4379772(-)	321509	1.87761	6	0.0125408	No		NC_000913.3:2595873-2596737(-)	7096	0.0414406	1	0.0405937	No
NC_000913.3:4245228-4246419(-)	569979	3.32868	2	0.844858	No		NC_000913.3:4406653-4409095(+)	168694	0.985173	2	0.258787	No		NC_000913.3:4375698-4376265(+)	98146	0.573173	2	0.113149	No
NC_000913.3:3448313-3448568(-)	471134	2.75142	2	0.76052	No		NC_000913.3:1795556-1797944(-)	164338	0.959734	2	0.249432	No		NC_000913.3:2716065-2716449(-)	298432	1.74284	1	0.824978	No
NC_000913.3:3325000-3326935(-)	313687	1.83193	1	0.839896	No		NC_000913.3:3088283-3089678(+)	82114	0.479546	1	0.380935	No		NC_000913.3:2349934-2351011(-)	374615	2.18775	2	0.642434	No
NC_000913.3:4371024-4372671(+)	540698	3.15768	2	0.823197	No		NC_000913.3:3476606-3477419(-)	194128	1.13371	1	0.678162	No		NC_000913.3:4406653-4409095(+)	143440	0.83769	1	0.567291	No
NC_000913.3:105304-106456(+)	265675	1.55154	2	0.459275	No		NC_000913.3:1164094-1165120(+)	19533	0.114073	1	0.107807	No		NC_000913.3:1795556-1797944(-)	173339	1.0123	2	0.268766	No
NC_000913.3:3445606-3446140(-)	427918	2.49904	1	0.917836	No		NC_000913.3:4056624-4058034(-)	308544	1.8019	1	0.835014	No		NC_000913.3:817043-818033(+)	42606	0.248819	1	0.220279	No
NC_000913.3:2299564-2300260(-)	110239	0.643796	1	0.474705	No		NC_000913.3:3145142-3146261(-)	175223	1.0233	2	0.272813	No		NC_000913.3:1149727-1150657(+)	128669	0.751427	1	0.528307	No
NC_000913.3:2640685-2641804(-)	101025	0.589986	1	0.445665	No		NC_000913.3:2543831-2544623(-)	166057	0.969773	2	0.253123	No		NC_000913.3:3088283-3089678(+)	114874	0.670864	2	0.145743	No
NC_000913.3:12162-14079(+)	296323	1.73053	2	0.516175	No		NC_000913.3:2171832-2172873(-)	628095	3.66807	7	0.0790244	No		NC_000913.3:3476606-3477419(-)	149950	0.875708	1	0.583433	No
NC_000913.3:2716065-2716449(-)	460636	2.69011	2	0.74954	No		NC_000913.3:3105713-3106970(+)	5800	0.033872	1	0.0333048	No		NC_000913.3:774308-774602(+)	26448	0.154456	1	0.143119	No
NC_000913.3:2349934-2351011(-)	551474	3.22061	3	0.624381	No		NC_000913.3:3378222-3378651(-)	445918	2.60416	2	0.733418	No		NC_000913.3:950339-951080(-)	48894	0.285541	1	0.248392	No
NC_000913.3:4406653-4409095(+)	253155	1.47843	4	0.0629639	No		NC_000913.3:3262451-3263660(-)	759563	4.43585	4	0.646765	No		NC_000913.3:3646298-3647651(+)	14874	0.0868642	1	0.0831984	No
NC_000913.3:4379006-4379366(-)	43368	0.253269	1	0.223741	No		NC_000913.3:3053514-3054840(-)	92678	0.54124	1	0.417974	No		NC_000913.3:2543831-2544623(-)	177131	1.03445	1	0.644576	No
NC_000913.3:1795556-1797944(-)	178640	1.04326	1	0.647695	No		NC_000913.3:478780-479251(-)	7115	0.0415516	1	0.0407002	No		NC_000913.3:4114568-4115579(-)	23972	0.139996	1	0.130639	No
NC_000913.3:2374999-2375962(-)	21860	0.127662	1	0.11985	No		NC_000913.3:3441054-3441675(-)	712578	4.16146	5	0.402673	No		NC_000913.3:3378222-3378651(-)	452430	2.64219	1	0.928795	No
NC_000913.3:3088283-3089678(+)	161320	0.942109	1	0.610195	No		NC_000913.3:1865725-1866472(-)	77556	0.452927	1	0.364235	No		NC_000913.3:4589128-4591279(-)	782693	4.57093	5	0.481304	No
NC_000913.3:3516019-3517306(-)	109728	0.640812	1	0.473135	No		NC_000913.3:4426107-4426557(+)	116197	0.67859	1	0.492668	No		NC_000913.3:2397438-2400165(-)	148447	0.86693	3	0.0575227	No
NC_000913.3:3476606-3477419(-)	159576	0.931924	1	0.606205	No		NC_000913.3:4175943-4177128(+)	632928	3.6963	5	0.312066	No		NC_000913.3:3262451-3263660(-)	134144	0.783401	2	0.185254	No
NC_000913.3:3145142-3146261(-)	160068	0.934797	1	0.607334	No		NC_000913.3:2684253-2685507(-)	274382	1.60239	1	0.798586	No		NC_000913.3:3991152-3993699(+)	92360	0.539382	1	0.416892	No
NC_000913.3:3783660-3784128(-)	113272	0.661508	1	0.483928	No		NC_000913.3:3258284-3259649(-)	715559	4.17886	4	0.600671	No		NC_000913.3:657291-657501(+)	63961	0.373532	4	0.000602765	No
NC_000913.3:950339-951080(-)	49938	0.291638	1	0.252961	No		NC_000913.3:458887-461242(+)	135796	0.793049	2	0.188711	No		NC_000913.3:2745936-2746185(-)	142084	0.829771	2	0.201947	No
NC_000913.3:2543831-2544623(-)	216937	1.26691	1	0.7183	No		NC_000913.3:3545623-3546199(+)	14265	0.0833076	1	0.0799319	No		NC_000913.3:2684253-2685507(-)	283785	1.6573	1	0.809348	No
NC_000913.3:3105713-3106970(+)	44056	0.257287	1	0.226854	No		NC_000913.3:455132-456431(+)	441726	2.57968	1	0.924202	No		NC_000913.3:3258284-3259649(-)	9687	0.0565721	1	0.0550016	No
NC_000913.3:4589128-4591279(-)	848445	4.95492	6	0.37613	No		NC_000913.3:824629-825040(+)	7942	0.0463813	1	0.0453221	No		NC_000913.3:1030758-1031418(-)	59359	0.346657	1	0.292952	No
NC_000913.3:3369474-3370350(-)	52725	0.307914	1	0.265021	No		NC_000913.3:1386719-1388261(+)	37575	0.219438	1	0.19703	No		NC_000913.3:4161123-4161771(+)	40308	0.235399	3	0.00182408	No
NC_000913.3:3262451-3263660(-)	335161	1.95734	3	0.311779	No		NC_000913.3:2662582-2663323(-)	140402	0.819948	1	0.559545	No		NC_000913.3:3300751-3301276(-)	126416	0.738269	1	0.52206	No
NC_000913.3:4581458-4583048(-)	59546	0.347749	1	0.293724	No		NC_000913.3:4233757-4235407(+)	363457	2.12259	2	0.62616	No		NC_000913.3:2302749-2303013(-)	30027	0.175358	1	0.160843	No
NC_000913.3:3991152-3993699(+)	111590	0.651686	2	0.139197	No		NC_000913.3:4185349-4189573(+)	874583	5.10756	5	0.578174	No		NC_000913.3:458887-461242(+)	131816	0.769805	1	0.536897	No
NC_000913.3:3053514-3054840(-)	85282	0.498047	2	0.0896123	No		NC_000913.3:3821427-3822051(+)	163589	0.95536	4	0.0163724	No		NC_000913.3:4161770-4162130(+)	27765	0.162148	1	0.149684	No
NC_000913.3:2829046-2829820(+)	33715	0.196896	1	0.178724	No		NC_000913.3:4464758-4466180(-)	783129	4.57347	6	0.309669	No		NC_000913.3:455132-456431(+)	585428	3.4189	6	0.131856	No
NC_000913.3:434646-435117(+)	35735	0.208692	1	0.188355	No		NC_000913.3:712986-713532(+)	90911	0.53092	1	0.411936	No		NC_000913.3:2662582-2663323(-)	101922	0.595224	2	0.120331	No
NC_000913.3:4018854-4019610(+)	88369	0.516075	1	0.403141	No		NC_000913.3:1260927-1261875(-)	78356	0.457599	1	0.367199	No		NC_000913.3:2866558-2867551(-)	101528	0.592924	2	0.119577	No
NC_000913.3:3881220-3882321(-)	26703	0.155946	2	0.0109663	No		NC_000913.3:3033656-3035174(-)	241678	1.4114	2	0.412096	No		NC_000913.3:4185349-4189573(+)	1432881	8.36803	20	0.000441932	No
NC_000913.3:657291-657501(+)	88842	0.518837	4	0.00200104	No		NC_000913.3:3888729-3890145(+)	3480855	20.3282	25	0.175657	No		NC_000913.3:3970132-3971263(+)	4698	0.0274363	1	0.0270634	No
NC_000913.3:4175943-4177128(+)	509503	2.9755	10	0.00103792	No		NC_000913.3:2174281-2174566(-)	226104	1.32045	1	0.732984	No		NC_000913.3:3033656-3035174(-)	208811	1.21946	1	0.704609	No
NC_000913.3:2684253-2685507(-)	264762	1.54621	1	0.786946	No		NC_000913.3:3918315-3919857(-)	413106	2.41254	1	0.910412	No		NC_000913.3:3706097-3707705(-)	118584	0.692531	1	0.499692	No
NC_000913.3:1030758-1031418(-)	80588	0.470634	1	0.375394	No		NC_000913.3:2744571-2745339(-)	409932	2.394	2	0.690251	No		NC_000913.3:3888729-3890145(+)	867402	5.06563	5	0.570946	No
NC_000913.3:2302749-2303013(-)	26248	0.153288	1	0.142118	No		NC_000913.3:2395341-2395896(-)	12380	0.0722992	1	0.0697475	No		NC_000913.3:2174281-2174566(-)	134113	0.78322	1	0.543068	No
NC_000913.3:458887-461242(+)	167903	0.980554	1	0.624897	No		NC_000913.3:4043417-4044044(+)	72318	0.422337	2	0.0676395	No		NC_000913.3:3918315-3919857(-)	429437	2.50791	2	0.714322	No
NC_000913.3:455132-456431(+)	463847	2.70887	3	0.508545	No		NC_000913.3:850449-850965(+)	180341	1.05319	1	0.651177	No		NC_000913.3:2744571-2745339(-)	614796	3.59041	2	0.873364	No
NC_000913.3:937371-937983(+)	41496	0.242337	1	0.215208	No		NC_000913.3:1907225-1907435(-)	468751	2.73751	1	0.935268	No		NC_000913.3:850449-850965(+)	193793	1.13175	2	0.312578	No
NC_000913.3:3004007-3005786(-)	27607	0.161225	1	0.148899	No		NC_000913.3:1026556-1027015(-)	125316	0.731845	1	0.51898	No		NC_000913.3:1907225-1907435(-)	442643	2.58504	2	0.729712	No
NC_000913.3:3300254-3300758(-)	32684	0.190875	1	0.173764	No		NC_000913.3:4345679-4347326(-)	251609	1.4694	1	0.769936	No		NC_000913.3:1026556-1027015(-)	126391	0.738123	1	0.52199	No
NC_000913.3:2866558-2867551(-)	137510	0.803058	1	0.552043	No		NC_000913.3:3782641-3783661(-)	239281	1.3974	2	0.40727	No		NC_000913.3:2533763-2534021(+)	193419	1.12957	5	0.00605941	No
NC_000913.3:4185349-4189573(+)	1415106	8.26422	10	0.316653	No		NC_000913.3:4619602-4620826(+)	387135	2.26087	1	0.89574	No		NC_000913.3:3811437-3811674(-)	246449	1.43926	3	0.176068	No
NC_000913.3:3442765-3444097(-)	1109862	6.48159	7	0.470576	No		NC_000913.3:3920417-3920888(-)	219218	1.28023	2	0.366158	No		NC_000913.3:3180420-3181581(+)	65324	0.381492	1	0.317158	No
NC_000913.3:3821427-3822051(+)	119338	0.696934	2	0.15474	No		NC_000913.3:3811437-3811674(-)	219460	1.28165	1	0.72242	No		NC_000913.3:4022735-4023512(+)	27648	0.161464	1	0.149103	No
NC_000913.3:4464758-4466180(-)	1004163	5.86431	8	0.23756	No		NC_000913.3:3180420-3181581(+)	80874	0.472304	2	0.0819244	No		NC_000913.3:773041-774181(+)	290348	1.69563	1	0.816517	No
NC_000913.3:712986-713532(+)	87605	0.511613	1	0.400472	No		NC_000913.3:4115713-4117222(-)	508446	2.96932	1	0.948662	No		NC_000913.3:4127012-4127225(+)	327611	1.91325	1	0.8524	No
NC_000913.3:2658951-2659467(-)	7794	0.045517	1	0.0444966	No		NC_000913.3:3602749-3604243(-)	63770	0.372417	1	0.310933	No		NC_000913.3:2336792-2339420(-)	289365	1.68989	3	0.240111	No
NC_000913.3:1260927-1261875(-)	39490	0.230622	2	0.0228374	No		NC_000913.3:1893366-1893711(+)	12298	0.0718203	1	0.0693019	No		NC_000913.3:3497002-3497809(+)	106309	0.620845	1	0.46251	No
NC_000913.3:4261668-4262706(+)	8458	0.0493947	1	0.0481946	No		NC_000913.3:100764-102240(+)	122275	0.714086	1	0.510361	No		NC_000913.3:553942-554437(-)	102932	0.601123	1	0.451804	No
NC_000913.3:3888729-3890145(+)	1921918	11.224	9	0.787299	No		NC_000913.3:2814217-2814733(-)	21948	0.128176	1	0.120302	No		NC_000913.3:1213327-1214059(-)	23336	0.136282	1	0.127404	No
NC_000913.3:2174281-2174566(-)	225662	1.31787	3	0.147021	No		NC_000913.3:3070164-3071244(-)	1417530	8.27838	10	0.31846	No		NC_000913.3:3070164-3071244(-)	768893	4.49034	5	0.466061	No
NC_000913.3:3918315-3919857(-)	481907	2.81434	6	0.0663677	No		NC_000913.3:923263-925540(+)	128006	0.747555	1	0.526477	No		NC_000913.3:190856-191708(+)	735540	4.29555	5	0.428702	No
NC_000913.3:2744571-2745339(-)	527340	3.07967	1	0.954025	No		NC_000913.3:4403299-4404304(+)	141916	0.828789	3	0.051651	No		NC_000913.3:461914-463786(+)	121242	0.708053	1	0.507398	No
NC_000913.3:1907225-1907435(-)	619413	3.61737	3	0.700317	No		NC_000913.3:190856-191708(+)	426661	2.4917	2	0.710995	No		NC_000913.3:427286-427619(+)	174217	1.01743	1	0.638476	No
NC_000913.3:666315-668217(-)	7876	0.0459958	1	0.0449541	No		NC_000913.3:461914-463786(+)	154822	0.90416	3	0.0635437	No		NC_000913.3:1301181-1302813(+)	650781	3.80056	3	0.731194	No
NC_000913.3:2533763-2534021(+)	183687	1.07273	2	0.290975	No		NC_000913.3:2468213-2469134(+)	75514	0.441002	1	0.356608	No		NC_000913.3:3451381-3451684(-)	339261	1.98128	2	0.588905	No
NC_000913.3:3920417-3920888(-)	234250	1.36802	1	0.745389	No		NC_000913.3:1800641-1802570(-)	726817	4.24461	3	0.795594	No		NC_000913.3:2352646-2354275(+)	635684	3.71239	4	0.508431	No
NC_000913.3:3180420-3181581(+)	79502	0.464292	1	0.37142	No		NC_000913.3:2705324-2707124(-)	85938	0.501878	1	0.394607	No		NC_000913.3:3265038-3266028(-)	461279	2.69387	2	0.750225	No
NC_000913.3:2532408-2533380(+)	88878	0.519048	2	0.0960344	No		NC_000913.3:1301181-1302813(+)	867334	5.06523	4	0.744012	No		NC_000913.3:2282516-2282801(+)	232104	1.35549	2	0.392704	No
NC_000913.3:4115713-4117222(-)	718934	4.19857	5	0.409896	No		NC_000913.3:2352646-2354275(+)	421299	2.46039	2	0.704476	No		NC_000913.3:764179-765049(+)	81006	0.473075	1	0.376917	No
NC_000913.3:773041-774181(+)	402074	2.34811	1	0.904451	No		NC_000913.3:953608-954466(-)	89658	0.523603	1	0.407617	No		NC_000913.3:1295445-1298121(-)	1313965	7.67356	13	0.0493488	No
NC_000913.3:4127012-4127225(+)	217791	1.2719	1	0.719701	No		NC_000913.3:3265038-3266028(-)	1225651	7.1578	4	0.926099	No		NC_000913.3:2906642-2907941(-)	1056825	6.17186	3	0.945274	No
NC_000913.3:2461305-2462646(+)	8569	0.050043	1	0.0488114	No		NC_000913.3:2282516-2282801(+)	147817	0.863251	2	0.214102	No		NC_000913.3:2822707-2823769(-)	338418	1.97636	3	0.316926	No
NC_000913.3:2336792-2339420(-)	339467	1.98249	7	0.00432679	No		NC_000913.3:3091877-3092828(+)	25105	0.146613	1	0.136372	No		NC_000913.3:1637608-1637782(-)	16244	0.094865	1	0.0905043	No
NC_000913.3:2814217-2814733(-)	19637	0.11468	1	0.108349	No		NC_000913.3:4365471-4366773(-)	389281	2.2734	5	0.0806719	No		NC_000913.3:3316038-3317526(-)	312074	1.82251	2	0.543828	No
NC_000913.3:3070164-3071244(-)	965017	5.6357	2	0.976323	No		NC_000913.3:1295445-1298121(-)	5498246	32.1098	46	0.0122292	No		NC_000913.3:3210780-3210996(+)	114696	0.669825	3	0.0305735	No
NC_000913.3:3986685-3987882(-)	144352	0.843016	1	0.569589	No		NC_000913.3:99643-100711(+)	25685	0.15	1	0.139292	No		NC_000913.3:3450247-3450526(-)	287516	1.67909	2	0.500234	No
NC_000913.3:3396325-3397795(-)	38501	0.224846	1	0.201361	No		NC_000913.3:3959531-3959813(-)	9627	0.0562217	1	0.0546704	No		NC_000913.3:3452958-3453270(-)	655220	3.82648	6	0.188372	No
NC_000913.3:779597-780389(+)	37230	0.217423	1	0.195411	No		NC_000913.3:197927-200360(+)	342471	2.00003	1	0.864669	No		NC_000913.3:4243530-4245075(-)	50542	0.295165	1	0.255591	No
NC_000913.3:461914-463786(+)	123944	0.723833	2	0.16413	No		NC_000913.3:2193058-2194168(-)	153852	0.898496	1	0.592818	No		NC_000913.3:3965760-3966090(+)	94370	0.551121	1	0.423696	No
NC_000913.3:481253-484403(-)	36633	0.213937	1	0.192601	No		NC_000913.3:2906642-2907941(-)	1685943	9.84591	6	0.926855	No		NC_000913.3:2825831-2826395(+)	98790	0.576934	1	0.438382	No
NC_000913.3:1249767-1250838(-)	353392	2.06381	1	0.873031	No		NC_000913.3:2822707-2823769(-)	500864	2.92505	5	0.172303	No		NC_000913.3:3442114-3442471(-)	300676	1.75595	1	0.827257	No
NC_000913.3:427286-427619(+)	123633	0.722017	1	0.514228	No		NC_000913.3:1637608-1637782(-)	18425	0.107602	1	0.102015	No		NC_000913.3:254258-255716(-)	280412	1.63761	1	0.805555	No
NC_000913.3:1800641-1802570(-)	574546	3.35535	4	0.431857	No		NC_000913.3:4347403-4348744(-)	138309	0.807725	1	0.554129	No		NC_000913.3:2400217-2401555(-)	163834	0.956791	2	0.24835	No
NC_000913.3:1301181-1302813(+)	742761	4.33772	2	0.930256	No		NC_000913.3:3316038-3317526(-)	516927	3.01885	2	0.80365	No		NC_000913.3:20814-21078(-)	364238	2.12715	2	0.627317	No
NC_000913.3:3451381-3451684(-)	328713	1.91968	7	0.00364263	No		NC_000913.3:3210780-3210996(+)	199336	1.16412	2	0.324368	No		NC_000913.3:2763536-2765153(-)	13520	0.0789568	2	0.00295777	No
NC_000913.3:2352646-2354275(+)	730417	4.26564	2	0.926055	No		NC_000913.3:3640110-3640545(+)	112969	0.659739	1	0.483014	No		NC_000913.3:664101-665190(-)	20794	0.121437	1	0.114353	No
NC_000913.3:926224-926443(-)	76946	0.449365	3	0.0108384	No		NC_000913.3:4356469-4358617(-)	501545	2.92902	2	0.789997	No		NC_000913.3:4618228-4619551(+)	231617	1.35264	1	0.741444	No
NC_000913.3:953608-954466(-)	122497	0.715382	1	0.510995	No		NC_000913.3:2942917-2943145(-)	22936	0.133946	1	0.125363	No		NC_000913.3:4150446-4153098(-)	180703	1.05531	1	0.651914	No
NC_000913.3:3265038-3266028(-)	789493	4.61064	2	0.9442	No		NC_000913.3:3452958-3453270(-)	521516	3.04565	5	0.192465	No		NC_000913.3:4016430-4017192(+)	534939	3.12404	4	0.380536	No
NC_000913.3:2282516-2282801(+)	193527	1.1302	1	0.677031	No		NC_000913.3:2109580-2110138(-)	4265	0.0249076	1	0.0246	No		NC_000913.3:3344716-3346150(+)	161598	0.943732	2	0.243553	No
NC_000913.3:4365471-4366773(-)	388290	2.26761	5	0.0800101	No		NC_000913.3:4425838-4426066(+)	86019	0.502351	2	0.0909178	No		NC_000913.3:3299965-3300268(+)	7243	0.0422991	1	0.041417	No
NC_000913.3:3989087-3989828(-)	19008	0.111007	1	0.105067	No		NC_000913.3:1155761-1156766(+)	7941	0.0463754	1	0.0453165	No		NC_000913.3:4122379-4123339(-)	83367	0.486863	3	0.0134113	No
NC_000913.3:1295445-1298121(-)	2588114	15.1146	14	0.647653	No		NC_000913.3:2825831-2826395(+)	97228	0.567812	1	0.433236	No		NC_000913.3:939427-940720(+)	383077	2.23717	2	0.654399	No
NC_000913.3:197927-200360(+)	304647	1.77914	2	0.530927	No		NC_000913.3:2400217-2401555(-)	127959	0.747281	1	0.526347	No		NC_000913.3:976325-980786(+)	130334	0.761151	1	0.532871	No
NC_000913.3:2193058-2194168(-)	147999	0.864314	1	0.57866	No		NC_000913.3:20814-21078(-)	475327	2.77591	2	0.764788	No		NC_000913.3:3613666-3615241(+)	85177	0.497434	1	0.391911	No
NC_000913.3:2906642-2907941(-)	1157650	6.76068	7	0.514056	No		NC_000913.3:1660555-1662979(+)	136506	0.797195	1	0.549409	No		NC_000913.3:3144153-3145140(-)	83328	0.486636	1	0.385309	No
NC_000913.3:2822707-2823769(-)	408876	2.38784	3	0.42711	No		NC_000913.3:1175426-1176626(+)	21668	0.126541	1	0.118862	No		NC_000913.3:3724406-3725318(-)	167449	0.977902	2	0.256112	No
NC_000913.3:3346577-3347069(+)	74760	0.436598	1	0.353769	No		NC_000913.3:4016430-4017192(+)	516678	3.0174	6	0.0856823	No		NC_000913.3:192871-193429(+)	177231	1.03503	1	0.644784	No
NC_000913.3:3316038-3317526(-)	463899	2.70917	4	0.287931	No		NC_000913.3:4110739-4111507(-)	700415	4.09042	5	0.388823	No		NC_000913.3:1019012-1020053(-)	3543019	20.6912	23	0.334194	No
NC_000913.3:3210780-3210996(+)	137328	0.801996	1	0.551567	No		NC_000913.3:3344716-3346150(+)	164929	0.963185	2	0.250701	No		NC_000913.3:3486119-3486752(+)	177240	1.03508	2	0.277144	No
NC_000913.3:3640110-3640545(+)	151407	0.884217	1	0.586962	No		NC_000913.3:4122379-4123339(-)	57597	0.336366	2	0.0453516	No		NC_000913.3:933223-937213(+)	38222	0.223216	1	0.200058	No
NC_000913.3:3450247-3450526(-)	245411	1.4332	2	0.419574	No		NC_000913.3:3553084-3555790(+)	156985	0.916792	1	0.600201	No		NC_000913.3:4615514-4617065(-)	223641	1.30606	3	0.144286	No
NC_000913.3:3452958-3453270(-)	624505	3.64711	3	0.705507	No		NC_000913.3:939427-940720(+)	349310	2.03997	3	0.334141	No		NC_000913.3:2099861-2101268(-)	185150	1.08128	1	0.660838	No
NC_000913.3:3337909-3338461(-)	19004	0.110983	1	0.105046	No		NC_000913.3:976325-980786(+)	105808	0.617919	1	0.460935	No		NC_000913.3:3447452-3447767(-)	279566	1.63267	1	0.804592	No
NC_000913.3:4425838-4426066(+)	75473	0.440762	1	0.356454	No		NC_000913.3:3613666-3615241(+)	18917	0.110475	1	0.104592	No		NC_000913.3:3444542-3444722(-)	113500	0.66284	2	0.142996	No
NC_000913.3:3965760-3966090(+)	94055	0.549281	1	0.422635	No		NC_000913.3:3046167-3049041(-)	437779	2.55663	2	0.724127	No		NC_000913.3:3446898-3447438(-)	793705	4.63524	2	0.945317	No
NC_000913.3:3442114-3442471(-)	295839	1.7277	1	0.822307	No		NC_000913.3:3724406-3725318(-)	159624	0.932204	2	0.23932	No		NC_000913.3:4402037-4403297(+)	257825	1.5057	2	0.44408	No
NC_000913.3:254258-255716(-)	319988	1.86873	2	0.557299	No		NC_000913.3:1019012-1020053(-)	3525069	20.5864	32	0.0117992	No		NC_000913.3:989153-990356(-)	27168	0.158661	1	0.146715	No
NC_000913.3:2460649-2460934(-)	236505	1.38119	3	0.161975	No		NC_000913.3:232596-233955(-)	283105	1.65333	1	0.808589	No		NC_000913.3:2413469-2414672(+)	286852	1.67522	1	0.812732	No
NC_000913.3:3962744-3964229(-)	19091	0.111491	1	0.105501	No		NC_000913.3:3486119-3486752(+)	182790	1.06749	1	0.656131	No		NC_000913.3:3473541-3474081(-)	750617	4.3836	7	0.154332	No
NC_000913.3:4150446-4153098(-)	198965	1.16196	2	0.323581	No		NC_000913.3:185122-185947(-)	73566	0.429625	1	0.349247	No		NC_000913.3:3448758-3449169(-)	432506	2.52584	2	0.717963	No
NC_000913.3:4016430-4017192(+)	568603	3.32064	3	0.644702	No		NC_000913.3:3403483-3404458(+)	34040	0.198794	1	0.180281	No		NC_000913.3:4583248-4586761(-)	283935	1.65818	3	0.23178	No
NC_000913.3:4110739-4111507(-)	513001	2.99593	3	0.575897	No		NC_000913.3:2099861-2101268(-)	227294	1.3274	1	0.734833	No		NC_000913.3:2597830-2598865(-)	109183	0.637629	1	0.471456	No
NC_000913.3:4122379-4123339(-)	66717	0.389627	1	0.322691	No		NC_000913.3:3447452-3447767(-)	243903	1.42439	1	0.759346	No		NC_000913.3:4400287-4400596(+)	207825	1.2137	1	0.702903	No
NC_000913.3:939427-940720(+)	324324	1.89405	2	0.564558	No		NC_000913.3:3444542-3444722(-)	73430	0.428831	1	0.34873	No		NC_000913.3:4115713-4117222(-)	618128	3.60987	2	0.875278	No
NC_000913.3:976325-980786(+)	148994	0.870125	2	0.216606	No		NC_000913.3:3446898-3447438(-)	1013084	5.91641	5	0.703599	No		NC_000913.3:1147366-1147540(+)	327922	1.91506	2	0.570517	No
NC_000913.3:3046167-3049041(-)	426800	2.49251	2	0.711162	No		NC_000913.3:4402037-4403297(+)	320655	1.87263	1	0.84628	No		NC_000913.3:932594-933089(+)	98418	0.574761	1	0.437161	No
NC_000913.3:192871-193429(+)	164287	0.959436	1	0.616891	No		NC_000913.3:1350250-1351039(-)	158614	0.926306	1	0.603986	No		NC_000913.3:3447777-3448149(-)	578709	3.37966	3	0.65632	No
NC_000913.3:1019012-1020053(-)	3279074	19.1498	10	0.991862	No		NC_000913.3:1755697-1757110(+)	640289	3.73929	3	0.721156	No		NC_000913.3:4587908-4588865(-)	157369	0.919035	1	0.601096	No
NC_000913.3:2872508-2872820(-)	12487	0.0729241	1	0.0703286	No		NC_000913.3:2413469-2414672(+)	290827	1.69843	2	0.506267	No		NC_000913.3:1273245-1273599(-)	16395	0.0957468	1	0.0913059	No
NC_000913.3:232596-233955(-)	161060	0.94059	2	0.242399	No		NC_000913.3:3473541-3474081(-)	474156	2.76907	5	0.147539	No		NC_000913.3:4118844-4119330(-)	112752	0.658472	2	0.141506	No
NC_000913.3:3486119-3486752(+)	190164	1.11056	1	0.670625	No		NC_000913.3:4583248-4586761(-)	264137	1.54256	3	0.20191	No		NC_000913.3:771457-773026(+)	608013	3.5508	6	0.149172	No
NC_000913.3:185122-185947(-)	85996	0.502217	1	0.394812	No		NC_000913.3:2597830-2598865(-)	125399	0.73233	2	0.167118	No		NC_000913.3:1052066-1052240(+)	83630	0.488399	1	0.386392	No
NC_000913.3:3444542-3444722(-)	85866	0.501457	1	0.394353	No		NC_000913.3:4105819-4106320(+)	214535	1.25288	1	0.71432	No		NC_000913.3:1503716-1504865(+)	78912	0.460846	1	0.36925	No
NC_000913.3:4402037-4403297(+)	308480	1.80152	4	0.108953	No		NC_000913.3:3450542-3451364(-)	487858	2.84909	5	0.160049	No		NC_000913.3:3445243-3445597(-)	464203	2.71095	3	0.509053	No
NC_000913.3:1350250-1351039(-)	122967	0.718127	1	0.512335	No		NC_000913.3:1147366-1147540(+)	242441	1.41586	1	0.757282	No		NC_000913.3:2926307-2927672(+)	136307	0.796033	1	0.548885	No
NC_000913.3:1755697-1757110(+)	373759	2.18275	3	0.372658	No		NC_000913.3:3434213-3435161(+)	46385	0.270888	1	0.237298	No		NC_000913.3:4178878-4179583(+)	593397	3.46544	2	0.860414	No
NC_000913.3:2413469-2414672(+)	279969	1.63502	1	0.805051	No		NC_000913.3:3447777-3448149(-)	593991	3.46891	4	0.456643	No		NC_000913.3:2745369-2745918(-)	316637	1.84916	3	0.282576	No
NC_000913.3:3473541-3474081(-)	576445	3.36644	2	0.849304	No		NC_000913.3:4118844-4119330(-)	89201	0.520934	3	0.0160248	No		NC_000913.3:1641338-1641554(-)	240948	1.40714	1	0.755157	No
NC_000913.3:3448758-3449169(-)	373633	2.18202	3	0.37246	No		NC_000913.3:89633-90092(+)	18779	0.109669	1	0.10387	No		NC_000913.3:3372682-3373576(-)	201734	1.17813	1	0.692145	No
NC_000913.3:3055611-3055941(+)	210678	1.23036	1	0.707812	No		NC_000913.3:771457-773026(+)	647781	3.78304	6	0.181945	No		NC_000913.3:54754-57109(-)	193598	1.13061	2	0.312163	No
NC_000913.3:4583248-4586761(-)	332605	1.94241	3	0.307741	No		NC_000913.3:191854-192580(+)	18426	0.107608	1	0.10202	No		NC_000913.3:4200280-4200553(+)	687967	4.01773	2	0.909712	No
NC_000913.3:4400287-4400596(+)	243685	1.42312	1	0.759039	No		NC_000913.3:1503716-1504865(+)	73417	0.428755	1	0.348681	No		NC_000913.3:4460521-4462660(-)	172848	1.00943	1	0.635574	No
NC_000913.3:2403950-2404613(-)	32481	0.189689	1	0.172784	No		NC_000913.3:3266126-3267065(-)	479416	2.79979	2	0.768886	No		NC_000913.3:22390-25207(+)	222739	1.3008	1	0.727685	No
NC_000913.3:1147366-1147540(+)	249714	1.45833	3	0.180768	No		NC_000913.3:3445243-3445597(-)	496622	2.90027	3	0.5541	No		NC_000913.3:3313341-3316014(-)	566644	3.3092	2	0.842519	No
NC_000913.3:3440039-3441029(-)	871259	5.08815	8	0.14274	No		NC_000913.3:2926307-2927672(+)	123278	0.719944	1	0.51322	No		NC_000913.3:3921235-3922051(-)	78913	0.460852	1	0.369254	No
NC_000913.3:3377814-3378207(-)	258310	1.50853	1	0.778765	No		NC_000913.3:1148758-1149712(+)	137300	0.801832	2	0.191867	No		NC_000913.3:1914835-1915534(-)	168051	0.981418	2	0.257406	No
NC_000913.3:3447777-3448149(-)	578401	3.37786	4	0.436797	No		NC_000913.3:4178878-4179583(+)	496926	2.90205	2	0.785736	No		NC_000913.3:2414746-2416891(+)	235481	1.37521	1	0.747213	No
NC_000913.3:4118844-4119330(-)	104530	0.610455	1	0.456896	No		NC_000913.3:2745369-2745918(-)	276257	1.61334	1	0.800779	No		NC_000913.3:2534065-2535793(+)	734458	4.28923	3	0.801291	No
NC_000913.3:3153562-3154222(+)	19895	0.116187	1	0.109691	No		NC_000913.3:4416440-4416770(-)	44437	0.259512	1	0.228572	No		NC_000913.3:90093-91035(+)	79431	0.463877	1	0.371159	No
NC_000913.3:4269413-4270127(+)	113798	0.66458	1	0.485511	No		NC_000913.3:3343943-3344669(+)	47786	0.27907	2	0.0324003	No		NC_000913.3:4180559-4180925(+)	600767	3.50848	8	0.0270672	No
NC_000913.3:771457-773026(+)	659541	3.85172	4	0.537038	No		NC_000913.3:1641338-1641554(-)	436574	2.54959	4	0.253076	No		NC_000913.3:2401551-2402052(-)	70192	0.409921	1	0.336298	No
NC_000913.3:1052066-1052240(+)	102405	0.598045	2	0.121258	No		NC_000913.3:1146793-1147315(+)	159796	0.933209	1	0.60671	No		NC_000913.3:1937648-1939091(+)	218361	1.27523	1	0.720633	No
NC_000913.3:4634440-4635310(-)	107441	0.627455	1	0.466051	No		NC_000913.3:1633071-1633305(+)	12166	0.0710494	1	0.0685842	No		NC_000913.3:3884492-3884852(+)	84897	0.495798	1	0.390916	No
NC_000913.3:3266126-3267065(-)	420313	2.45463	1	0.914105	No		NC_000913.3:4200280-4200553(+)	493273	2.88071	4	0.326065	No		NC_000913.3:91412-93179(+)	38404	0.224279	1	0.200908	No
NC_000913.3:3445243-3445597(-)	464406	2.71213	1	0.933605	No		NC_000913.3:4460521-4462660(-)	324971	1.89783	3	0.295694	No		NC_000913.3:1283603-1285142(+)	643291	3.75682	3	0.724057	No
NC_000913.3:1148758-1149712(+)	136896	0.799473	1	0.550434	No		NC_000913.3:2402054-2403845(-)	186525	1.08931	4	0.0249594	No		NC_000913.3:3405916-3407266(+)	159622	0.932192	1	0.60631	No
NC_000913.3:4178878-4179583(+)	632273	3.69247	3	0.713291	No		NC_000913.3:1947410-1948151(-)	32544	0.190057	1	0.173088	No		NC_000913.3:4349314-4350034(-)	6591	0.0384914	1	0.0377601	No
NC_000913.3:1641338-1641554(-)	386279	2.25587	2	0.658842	No		NC_000913.3:4449121-4449652(-)	288770	1.68642	2	0.502524	No		NC_000913.3:2928228-2929518(+)	120411	0.7032	1	0.505001	No
NC_000913.3:3370346-3371036(-)	46715	0.272816	1	0.238767	No		NC_000913.3:22390-25207(+)	198460	1.15901	4	0.0303222	No		NC_000913.3:3446578-3446884(-)	330046	1.92747	4	0.130031	No
NC_000913.3:54754-57109(-)	211078	1.2327	2	0.349156	No		NC_000913.3:3313341-3316014(-)	630403	3.68155	3	0.711432	No		NC_000913.3:987584-988985(-)	183914	1.07406	1	0.658381	No
NC_000913.3:202559-203348(+)	116042	0.677685	1	0.492209	No		NC_000913.3:444682-445174(+)	66154	0.386339	3	0.0072137	No		NC_000913.3:3470144-3471329(-)	1416839	8.27434	11	0.212246	No
NC_000913.3:4200280-4200553(+)	604733	3.53164	4	0.470179	No		NC_000913.3:1914835-1915534(-)	167675	0.979222	2	0.256598	No		NC_000913.3:2298714-2299578(-)	68797	0.401774	1	0.330868	No
NC_000913.3:3577064-3577592(-)	8312	0.0485421	1	0.0473827	No		NC_000913.3:2414746-2416891(+)	310726	1.81464	1	0.837103	No		NC_000913.3:4247970-4249311(+)	228759	1.33595	5	0.0118731	No
NC_000913.3:3569345-3571319(-)	37402	0.218428	2	0.0206502	No		NC_000913.3:3795978-3796938(+)	58535	0.341844	1	0.289541	No		NC_000913.3:2440384-2441605(-)	151935	0.8873	3	0.0607821	No
NC_000913.3:2402054-2403845(-)	192199	1.12244	6	0.00107218	No		NC_000913.3:497174-497819(+)	205576	1.20056	4	0.0338179	No		NC_000913.3:3194765-3194825(+)	15315	0.0894396	2	0.00376904	No
NC_000913.3:4449121-4449652(-)	261385	1.52649	1	0.782703	No		NC_000913.3:2534065-2535793(+)	752738	4.39599	7	0.155859	No		NC_000913.3:108278-110984(+)	236189	1.37934	1	0.748256	No
NC_000913.3:2405702-2406641(-)	24235	0.141532	1	0.131973	No		NC_000913.3:3333139-3333451(-)	222136	1.29727	1	0.726724	No		NC_000913.3:1285138-1285849(+)	165948	0.969136	1	0.620589	No
NC_000913.3:22390-25207(+)	236606	1.38178	2	0.401861	No		NC_000913.3:3144153-3145140(-)	157419	0.919327	2	0.234597	No		NC_000913.3:3099681-3100728(-)	875718	5.11419	8	0.145568	No
NC_000913.3:3313341-3316014(-)	629566	3.67667	4	0.500966	No		NC_000913.3:90093-91035(+)	50592	0.295457	1	0.255809	No		NC_000913.3:2172920-2173362(-)	234575	1.36992	4	0.0503911	No
NC_000913.3:4486217-4487318(+)	38194	0.223053	1	0.199928	No		NC_000913.3:932594-933089(+)	62523	0.365134	2	0.0524556	No		NC_000913.3:1735377-1735959(+)	433369	2.53087	2	0.71898	No
NC_000913.3:3921235-3922051(-)	96995	0.566451	1	0.432464	No		NC_000913.3:4180559-4180925(+)	295079	1.72326	2	0.513944	No		NC_000913.3:4178446-4178875(+)	352683	2.05967	2	0.609904	No
NC_000913.3:1914835-1915534(-)	127823	0.746486	3	0.04004	No		NC_000913.3:3884492-3884852(+)	112474	0.656848	1	0.481517	No		NC_000913.3:1224548-1225361(-)	123337	0.720288	1	0.513388	No
NC_000913.3:2414746-2416891(+)	277004	1.6177	2	0.480769	No		NC_000913.3:91412-93179(+)	42592	0.248737	1	0.220215	No		NC_000913.3:983649-984297(+)	17320	0.101149	1	0.0962015	No
NC_000913.3:2534065-2535793(+)	653950	3.81907	7	0.0926861	No		NC_000913.3:3405916-3407266(+)	173466	1.01304	2	0.269039	No		NC_000913.3:672200-674783(-)	161943	0.945747	1	0.611611	No
NC_000913.3:3333139-3333451(-)	164944	0.963273	1	0.618358	No		NC_000913.3:103154-103985(+)	31890	0.186238	1	0.169924	No		NC_000913.3:3342835-3343411(+)	23322	0.1362	1	0.127332	No
NC_000913.3:3327034-3327664(-)	62812	0.366822	2	0.052884	No		NC_000913.3:1109334-1110870(+)	100843	0.588923	1	0.445075	No		NC_000913.3:106556-107474(+)	485344	2.83441	2	0.774716	No
NC_000913.3:3144153-3145140(-)	159675	0.932502	1	0.606432	No		NC_000913.3:1489963-1490713(-)	107447	0.62749	1	0.46607	No		NC_000913.3:779066-779588(+)	194136	1.13375	1	0.678177	No
NC_000913.3:4180559-4180925(+)	491738	2.87175	1	0.9434	No		NC_000913.3:431128-432013(-)	341411	1.99384	1	0.863829	No		NC_000913.3:4617322-4618102(+)	181322	1.05892	2	0.285905	No
NC_000913.3:1283603-1285142(+)	540992	3.15939	1	0.957549	No		NC_000913.3:494075-494405(+)	98366	0.574457	2	0.113564	No		NC_000913.3:457425-458700(+)	244891	1.43016	1	0.76073	No
NC_000913.3:3405916-3407266(+)	148871	0.869407	2	0.216344	No		NC_000913.3:3577730-3578726(-)	7504	0.0438234	1	0.042877	No		NC_000913.3:3477906-3478497(-)	203500	1.18844	1	0.695304	No
NC_000913.3:4618228-4619551(+)	278646	1.62729	1	0.803539	No		NC_000913.3:3446578-3446884(-)	372984	2.17823	1	0.886758	No		NC_000913.3:2819380-2822011(-)	245447	1.43341	1	0.761506	No
NC_000913.3:1994702-1995359(-)	33424	0.195196	1	0.177327	No		NC_000913.3:3179743-3180415(+)	93255	0.544609	1	0.419932	No		NC_000913.3:4619602-4620826(+)	494509	2.88793	6	0.0730438	No
NC_000913.3:431128-432013(-)	510017	2.9785	1	0.949131	No		NC_000913.3:3718333-3719044(-)	93799	0.547786	1	0.421772	No		NC_000913.3:4620882-4621602(+)	340454	1.98825	1	0.863065	No
NC_000913.3:703943-705890(+)	96892	0.565849	1	0.432122	No		NC_000913.3:987584-988985(-)	209609	1.22412	2	0.346071	No		NC_000913.3:575785-576825(-)	603266	3.52307	2	0.86653	No
NC_000913.3:180883-182308(+)	188167	1.0989	1	0.666761	No		NC_000913.3:3470144-3471329(-)	964582	5.63316	3	0.919514	No		NC_000913.3:1862770-1863766(+)	4064045	23.734	24	0.505456	No
NC_000913.3:4463053-4464709(-)	899734	5.25445	8	0.161262	No		NC_000913.3:3211106-3212852(+)	83963	0.490344	2	0.0872899	No		NC_000913.3:3260123-3262418(-)	232794	1.35952	3	0.156806	No
NC_000913.3:494075-494405(+)	94731	0.553229	1	0.42491	No		NC_000913.3:4247970-4249311(+)	134690	0.78659	1	0.544605	No		NC_000913.3:1757420-1757657(+)	2561670	14.9602	15	0.530259	No
NC_000913.3:2597830-2598865(-)	117161	0.68422	2	0.150339	No		NC_000913.3:1988715-1989213(+)	111862	0.653274	1	0.479661	No		NC_000913.3:1195122-1196373(+)	278127	1.62426	2	0.482871	No
NC_000913.3:3446578-3446884(-)	290955	1.69918	7	0.00187004	No		NC_000913.3:3890235-3891483(+)	145677	0.850754	2	0.209556	No		NC_000913.3:4639589-4640306(-)	351413	2.05225	3	0.337463	No
NC_000913.3:987584-988985(-)	161818	0.945017	1	0.611327	No		NC_000913.3:2508460-2509426(-)	120496	0.703697	1	0.505247	No		NC_000913.3:4031160-4032492(+)	94016	0.549053	1	0.422504	No
NC_000913.3:3470144-3471329(-)	1140510	6.66058	2	0.990191	No		NC_000913.3:108278-110984(+)	345727	2.01905	4	0.14633	No		NC_000913.3:654582-655968(-)	113001	0.659926	1	0.48311	No
NC_000913.3:4247970-4249311(+)	344835	2.01384	4	0.145382	No		NC_000913.3:3099681-3100728(-)	1026106	5.99246	6	0.553108	No		NC_000913.3:3309032-3311168(-)	510754	2.9828	2	0.798268	No
NC_000913.3:2440384-2441605(-)	322474	1.88325	2	0.561472	No		NC_000913.3:2277892-2278237(-)	13249	0.0773742	1	0.0744565	No		NC_000913.3:2300266-2302753(-)	465438	2.71816	4	0.289915	No
NC_000913.3:3194765-3194825(+)	26357	0.153925	2	0.0106982	No		NC_000913.3:2172920-2173362(-)	468528	2.7362	3	0.515202	No		NC_000913.3:1292508-1292922(-)	649034	3.79036	1	0.977412	No
NC_000913.3:789982-791029(-)	140151	0.818482	4	0.00980663	No		NC_000913.3:4353199-4354717(-)	533496	3.11562	1	0.955649	No		NC_000913.3:4100809-4101430(+)	144732	0.845235	1	0.570544	No
NC_000913.3:2508460-2509426(-)	110805	0.647101	1	0.476439	No		NC_000913.3:3449900-3450233(-)	158813	0.927468	1	0.604446	No		NC_000913.3:3140791-3141286(-)	25692	0.150041	1	0.139328	No
NC_000913.3:1285138-1285849(+)	166358	0.971531	1	0.621497	No		NC_000913.3:4463053-4464709(-)	723318	4.22418	5	0.414871	No		NC_000913.3:3079643-3081635(-)	439453	2.56641	2	0.72606	No
NC_000913.3:3929596-3931093(-)	36852	0.215216	1	0.193632	No		NC_000913.3:4178446-4178875(+)	240157	1.40252	3	0.167111	No		NC_000913.3:2737153-2737495(+)	1658363	9.68484	21	0.00108537	No
NC_000913.3:3099681-3100728(-)	1104727	6.45161	8	0.320179	No		NC_000913.3:1224548-1225361(-)	88916	0.519269	1	0.405045	No		NC_000913.3:584679-585633(-)	337564	1.97137	1	0.860735	No
NC_000913.3:2172920-2173362(-)	405661	2.36906	1	0.906431	No		NC_000913.3:672200-674783(-)	258285	1.50838	1	0.778733	No		NC_000913.3:4366890-4368327(-)	2236333	13.0602	9	0.902963	No
NC_000913.3:1735377-1735959(+)	453704	2.64963	3	0.493958	No		NC_000913.3:1948749-1950522(-)	93610	0.546682	2	0.104676	No		NC_000913.3:3178114-3179596(+)	315536	1.84273	2	0.549756	No
NC_000913.3:983649-984297(+)	30675	0.179142	1	0.164013	No		NC_000913.3:106556-107474(+)	556963	3.25266	2	0.835545	No		NC_000913.3:4400671-4401952(+)	161695	0.944299	2	0.243761	No
NC_000913.3:176609-176954(+)	23027	0.134478	2	0.00827093	No		NC_000913.3:779066-779588(+)	155014	0.905282	3	0.0637294	No		NC_000913.3:761521-762739(+)	169419	0.989407	1	0.628203	No
NC_000913.3:3882325-3883729(-)	59379	0.346773	1	0.293034	No		NC_000913.3:4617322-4618102(+)	121744	0.710985	1	0.50884	No		NC_000913.3:4463053-4464709(-)	692927	4.04669	6	0.222209	No
NC_000913.3:1948749-1950522(-)	58315	0.34056	1	0.288628	No		NC_000913.3:1234937-1235657(+)	74761	0.436604	1	0.353773	No		NC_000913.3:4274124-4274661(+)	38852	0.226896	1	0.202996	No
NC_000913.3:106556-107474(+)	573874	3.35142	3	0.650796	No		NC_000913.3:457425-458700(+)	284593	1.66202	2	0.494869	No		NC_000913.3:2311645-2312749(-)	5246519	30.6397	30	0.570154	No
NC_000913.3:779066-779588(+)	172057	1.00481	2	0.266012	No		NC_000913.3:3259720-3260110(-)	216779	1.26599	2	0.361081	No		NC_000913.3:961994-963668(+)	2410738	14.0787	10	0.894275	No
NC_000913.3:4617322-4618102(+)	201379	1.17605	2	0.328701	No		NC_000913.3:3477906-3478497(-)	235317	1.37425	2	0.399246	No		NC_000913.3:1141181-1144367(-)	381824	2.22985	2	0.652648	No
NC_000913.3:457425-458700(+)	333376	1.94692	1	0.857286	No		NC_000913.3:990621-993234(+)	58617	0.342323	1	0.289881	No		NC_000913.3:3347114-3347969(+)	72312	0.422302	1	0.344464	No
NC_000913.3:2194299-2196333(+)	23705	0.138437	1	0.129282	No		NC_000913.3:4390456-4391509(-)	59714	0.34873	1	0.294416	No		NC_000913.3:2598881-2599760(-)	174510	1.01914	2	0.271281	No
NC_000913.3:2819380-2822011(-)	213286	1.24559	1	0.712229	No		NC_000913.3:4620882-4621602(+)	380773	2.22371	2	0.651173	No		NC_000913.3:4179995-4180493(+)	1631101	9.52563	10	0.481504	No
NC_000913.3:3966416-3967676(+)	281624	1.64468	2	0.489381	No		NC_000913.3:575785-576825(-)	337444	1.97067	2	0.585998	No		NC_000913.3:3444725-3445229(-)	400985	2.34175	1	0.903841	No
NC_000913.3:3446898-3447438(-)	802958	4.68927	6	0.329698	No		NC_000913.3:1862770-1863766(+)	4735993	27.6582	40	0.0160098	No		NC_000913.3:1902047-1903019(+)	157710	0.921026	4	0.014523	No
NC_000913.3:4619602-4620826(+)	540360	3.1557	2	0.822932	No		NC_000913.3:3260123-3262418(-)	2916581	17.0328	17	0.53542	No		NC_000913.3:3444104-3444539(-)	326137	1.90464	1	0.851124	No
NC_000913.3:4620882-4621602(+)	413205	2.41312	2	0.694404	No		NC_000913.3:1757420-1757657(+)	3242078	18.9337	15	0.846818	No		NC_000913.3:3471399-3473514(-)	3659552	21.3718	25	0.243062	No
NC_000913.3:575785-576825(-)	599456	3.50082	2	0.864199	No		NC_000913.3:4031160-4032492(+)	136073	0.794666	1	0.548268	No		NC_000913.3:713557-715198(+)	142139	0.830092	2	0.202063	No
NC_000913.3:1862770-1863766(+)	3731959	21.7946	24	0.346014	No		NC_000913.3:3877704-3880119(-)	208330	1.21665	2	0.343381	No		NC_000913.3:638944-639508(+)	656148	3.8319	4	0.53302	No
NC_000913.3:4287763-4289200(+)	187297	1.09381	1	0.665064	No		NC_000913.3:3309032-3311168(-)	608756	3.55514	2	0.869826	No		NC_000913.3:3441054-3441675(-)	1185962	6.92602	5	0.820152	No
NC_000913.3:3260123-3262418(-)	735150	4.29328	2	0.927693	No		NC_000913.3:1292508-1292922(-)	537713	3.14024	2	0.820842	No		NC_000913.3:4168371-4168447(+)	100643	0.587755	1	0.444427	No
NC_000913.3:93165-94653(+)	30497	0.178102	1	0.163143	No		NC_000913.3:3915992-3917375(-)	253863	1.48256	2	0.436321	No		NC_000913.3:2729368-2729444(-)	101003	0.589858	1	0.445594	No
NC_000913.3:1757420-1757657(+)	3410113	19.9151	21	0.433362	No		NC_000913.3:427646-429494(+)	155961	0.910812	1	0.597803	No		NC_000913.3:2691156-2691340(-)	87436	0.510626	1	0.39988	No
NC_000913.3:1195122-1196373(+)	225248	1.31545	1	0.731646	No		NC_000913.3:3079643-3081635(-)	502008	2.93173	2	0.79042	No		NC_000913.3:4019977-4020229(+)	11114	0.0649058	1	0.0628442	No
NC_000913.3:3309032-3311168(-)	662046	3.86635	6	0.194345	No		NC_000913.3:2737153-2737495(+)	1296176	7.56967	6	0.766095	No		NC_000913.3:4175387-4175463(+)	11992	0.0700333	1	0.0676372	No
NC_000913.3:2300266-2302753(-)	618334	3.61107	5	0.29568	No		NC_000913.3:3822399-3824508(+)	143540	0.838274	3	0.0530825	No		NC_000913.3:4051035-4051280(+)	318415	1.85954	1	0.844256	No
NC_000913.3:1292508-1292922(-)	541046	3.15971	3	0.611624	No		NC_000913.3:3969030-3970077(+)	40255	0.235089	1	0.2095	No		NC_000913.3:2924155-2924524(-)	1343479	7.84592	8	0.525332	No
NC_000913.3:3915992-3917375(-)	319830	1.86781	1	0.845538	No		NC_000913.3:4366890-4368327(-)	2580249	15.0687	17	0.342485	No		NC_000913.3:4190326-4190487(-)	148807	0.869033	1	0.580643	No
NC_000913.3:944032-944896(+)	38983	0.227661	1	0.203606	No		NC_000913.3:3178114-3179596(+)	300773	1.75651	1	0.827354	No		NC_000913.3:2755592-2755955(+)	9611912	56.1336	30	0.999949	No
NC_000913.3:2171428-2171727(-)	49414	0.288578	1	0.250671	No		NC_000913.3:1696461-1697052(-)	4756	0.027775	1	0.0273929	No		NC_000913.3:2043467-2043557(-)	37078	0.216536	1	0.194696	No
NC_000913.3:4639589-4640306(-)	259474	1.51533	1	0.780264	No		NC_000913.3:4400671-4401952(+)	214043	1.25001	1	0.713498	No		NC_000913.3:189711-189847(+)	101035	0.590044	1	0.445697	No
NC_000913.3:3079643-3081635(-)	521804	3.04734	3	0.587331	No		NC_000913.3:53415-54702(-)	165273	0.965194	1	0.619091	No		NC_000913.3:3055982-3056165(+)	678797	3.96417	3	0.7566	No
NC_000913.3:3822399-3824508(+)	67726	0.39552	1	0.32667	No		NC_000913.3:848407-848911(-)	195828	1.14364	1	0.681342	No		NC_000913.3:696429-696504(-)	9143	0.0533951	1	0.0519946	No
NC_000913.3:584679-585633(-)	273460	1.59701	3	0.215868	No		NC_000913.3:1166084-1167389(+)	64829	0.378601	2	0.0559082	No		NC_000913.3:4175672-4175747(+)	52814	0.308434	2	0.038829	No
NC_000913.3:4366890-4368327(-)	2925696	17.0861	16	0.636306	No		NC_000913.3:2311645-2312749(-)	6490065	37.902	39	0.450671	No
NC_000913.3:2535833-2536343(+)	263627	1.53958	4	0.0707083	No		NC_000913.3:1435184-1435619(-)	6607	0.0385849	1	0.03785	No
NC_000913.3:786842-787595(-)	91600	0.534944	1	0.414298	No		NC_000913.3:961994-963668(+)	1843084	10.7636	7	0.911135	No
NC_000913.3:3178114-3179596(+)	292240	1.70668	3	0.244542	No		NC_000913.3:1141181-1144367(-)	285393	1.6667	5	0.027545	No
NC_000913.3:2618074-2618776(-)	19462	0.113658	1	0.107437	No		NC_000913.3:3919869-3920403(-)	91057	0.531773	1	0.412438	No
NC_000913.3:761521-762739(+)	105693	0.617247	1	0.460573	No		NC_000913.3:2598881-2599760(-)	206519	1.20607	2	0.339566	No
NC_000913.3:3450542-3451364(-)	818105	4.77773	11	0.0100929	No		NC_000913.3:4179995-4180493(+)	843005	4.92315	10	0.0291259	No
NC_000913.3:2311645-2312749(-)	5688385	33.2202	31	0.673349	No		NC_000913.3:3444725-3445229(-)	348881	2.03747	3	0.333463	No
NC_000913.3:961994-963668(+)	2030404	11.8576	17	0.093741	No		NC_000913.3:2344864-2347150(+)	102352	0.597736	2	0.121156	No
NC_000913.3:3347114-3347969(+)	90421	0.528059	2	0.0988293	No		NC_000913.3:1902047-1903019(+)	198357	1.1584	2	0.32229	No
NC_000913.3:2598881-2599760(-)	201843	1.17876	3	0.11594	No		NC_000913.3:3529773-3530652(+)	12481	0.072889	1	0.070296	No
NC_000913.3:4179995-4180493(+)	1326072	7.74426	9	0.371804	No		NC_000913.3:3444104-3444539(-)	237661	1.38794	1	0.750411	No
NC_000913.3:3444725-3445229(-)	363208	2.12113	4	0.16537	No		NC_000913.3:3471399-3473514(-)	2315304	13.5214	15	0.378975	No
NC_000913.3:3791354-3792551(-)	56433	0.329569	1	0.280766	No		NC_000913.3:2351015-2352374(-)	815830	4.76445	5	0.517251	No
NC_000913.3:1902047-1903019(+)	210349	1.22844	2	0.347626	No		NC_000913.3:3440039-3441029(-)	608151	3.5516	2	0.869466	No
NC_000913.3:3444104-3444539(-)	281695	1.6451	1	0.807007	No		NC_000913.3:713557-715198(+)	136969	0.799899	1	0.550626	No
NC_000913.3:1225384-1226080(-)	74676	0.436108	1	0.353452	No		NC_000913.3:638944-639508(+)	594062	3.46932	3	0.673441	No
NC_000913.3:3471399-3473514(-)	3085826	18.0212	12	0.945631	No		NC_000913.3:4168371-4168447(+)	212975	1.24377	3	0.130141	No
NC_000913.3:2351015-2352374(-)	970810	5.66953	4	0.816782	No		NC_000913.3:3943434-3943510(+)	210215	1.22766	3	0.126565	No
NC_000913.3:638944-639508(+)	608329	3.55264	7	0.069423	No		NC_000913.3:2729368-2729444(-)	206711	1.20719	2	0.339971	No
NC_000913.3:3441054-3441675(-)	966414	5.64386	9	0.118249	No		NC_000913.3:2691156-2691340(-)	73702	0.43042	1	0.349764	No
NC_000913.3:3943434-3943510(+)	205238	1.19859	1	0.698381	No		NC_000913.3:4209773-4209849(+)	210616	1.23	5	0.00855405	No
NC_000913.3:3423879-3426783(-)	64281	0.375401	3	0.00667161	No		NC_000913.3:4051035-4051280(+)	415983	2.42934	2	0.697893	No
NC_000913.3:2729368-2729444(-)	207656	1.21271	4	0.0348821	No		NC_000913.3:4190326-4190487(-)	139606	0.815299	1	0.557493	No
NC_000913.3:4209773-4209849(+)	207162	1.20983	5	0.00800444	No		NC_000913.3:2818552-2818645(-)	14717	0.0859473	1	0.0823574	No
NC_000913.3:4175387-4175463(+)	10259	0.0599126	1	0.0581531	No		NC_000913.3:2755592-2755955(+)	11753453	68.6402	39	0.999961	No
NC_000913.3:4051035-4051280(+)	405130	2.36596	2	0.684074	No		NC_000913.3:2818197-2818274(-)	9599	0.0560582	2	0.00151375	No
NC_000913.3:1287537-1287622(-)	8576	0.0500838	1	0.0488503	No		NC_000913.3:189711-189847(+)	53285	0.311184	1	0.267421	No
NC_000913.3:4190326-4190487(-)	225689	1.31802	2	0.379549	No		NC_000913.3:3055982-3056165(+)	693980	4.05284	2	0.912217	No
NC_000913.3:696541-696616(-)	17592	0.102737	2	0.00492956	No		NC_000913.3:2924155-2924524(-)	2427519	14.1767	21	0.0531552	No
NC_000913.3:4037518-4040423(+)	57971	0.338551	1	0.287197	No		NC_000913.3:4175672-4175747(+)	67594	0.394749	2	0.0601496	No
NC_000913.3:2818552-2818645(-)	14802	0.0864437	1	0.0828128	No
NC_000913.3:2726280-2729184(-)	60425	0.352882	2	0.0493838	No
NC_000913.3:696755-696830(-)	28414	0.165938	1	0.152901	No
NC_000913.3:1287243-1287328(-)	5162	0.0301461	1	0.0296962	No
NC_000913.3:2755592-2755955(+)	13908186	81.2238	62	0.988339	No
NC_000913.3:3943703-3946607(+)	68237	0.398504	1	0.328676	No
NC_000913.3:2043467-2043557(-)	37299	0.217826	2	0.0205447	No
NC_000913.3:3946956-3947032(+)	89728	0.524012	1	0.40786	No
NC_000913.3:3055982-3056165(+)	1190204	6.95079	10	0.164549	No
NC_000913.3:1991814-1991901(-)	18264	0.106662	1	0.10117	No
NC_000913.3:2924155-2924524(-)	1865160	10.8925	13	0.299603	No
NC_000913.3:4175672-4175747(+)	47500	0.2774	2	0.0320484	No

## Sheet: Table 3.Hotspot_A. tumefaciens
Biological replicate 1							Biological replicate 2							Biological replicate 2
				p-value after Bonferroni correction:	0.000141243						p-value after Bonferroni correction:	0.000169492						p-value after Bonferroni correction:	0.000162338		The number of hotspot genes supported by at least two replicates: 0
Gene_ID	Coverage	Expected number of transcription errors	Observed number of transcription errors	Poisson cumulative probability of >= observed mutations in the gene	Significant		Gene_ID	Coverage	Expected number of transcription errors	Observed number of transcription errors	Poisson cumulative probability of >= observed mutations in the gene	Significant		Gene_ID	Coverage	Expected number of transcription errors	Observed number of transcription errors	Poisson cumulative probability of >= observed mutations in the gene	Significant
NC_003063.2:567256-569965(+)	123498	0.896595	1	0.592044	No		NC_003063.2:815072-817055(+)	126293	0.916887	1	0.600239	No		NC_003063.2:1232023-1233628(+)	670628	4.86876	3	0.86385	No
NC_003063.2:1146286-1147750(-)	190844	1.38553	3	0.163016	No		NC_003063.2:567256-569965(+)	105621	0.766808	1	0.535507	No		NC_003063.2:815072-817055(+)	154442	1.12125	1	0.674127	No
NC_003062.2:1247189-1248467(+)	346678	2.51688	2	0.716149	No		NC_003062.2:1900679-1901105(-)	84278	0.611858	1	0.457658	No		NC_003062.2:1559352-1559598(+)	51541	0.374188	1	0.312152	No
NC_003063.2:1477259-1479938(+)	170467	1.23759	1	0.709918	No		NC_003062.2:1247189-1248467(+)	219764	1.59549	1	0.79719	No		NC_003062.2:1247189-1248467(+)	292031	2.12015	3	0.355805	No
NC_003062.2:1351877-1352387(-)	10045	0.0729267	1	0.070331	No		NC_003063.2:1573836-1575474(+)	400993	2.91121	3	0.556626	No		NC_003063.2:1008351-1009593(+)	172468	1.25212	3	0.132007	No
NC_003064.2:93277-95251(-)	8928	0.0648173	1	0.0627613	No		NC_003063.2:1008351-1009593(+)	223986	1.62614	4	0.0824571	No		NC_003063.2:787032-788211(-)	122344	0.888217	1	0.588612	No
NC_003063.2:1071505-1072777(+)	7145	0.0518727	1	0.0505503	No		NC_003062.2:2416526-2418863(-)	94609	0.686861	1	0.496847	No		NC_003063.2:1545293-1545995(+)	86884	0.630778	2	0.132136	No
NC_003062.2:1460698-1461061(-)	100706	0.731126	1	0.518633	No		NC_003063.2:1477259-1479938(+)	113099	0.821099	1	0.560052	No		NC_003062.2:2255100-2255553(+)	254456	1.84735	2	0.551103	No
NC_003062.2:872848-873451(+)	270515	1.96394	3	0.313564	No		NC_003062.2:1256554-1257160(+)	91964	0.667659	1	0.487092	No		NC_003062.2:2614950-2615451(-)	11358	0.0824591	1	0.0791509	No
NC_003063.2:676546-677536(-)	101180	0.734567	1	0.520287	No		NC_003062.2:2255100-2255553(+)	217493	1.579	1	0.793819	No		NC_003062.2:1446123-1446366(+)	16191	0.117547	1	0.110901	No
NC_003063.2:587568-588084(+)	14042	0.101945	1	0.0969207	No		NC_003063.2:547912-548419(-)	52986	0.384678	2	0.0574916	No		NC_003062.2:1908656-1908962(-)	143676	1.04309	3	0.0883952	No
NC_003063.2:1009716-1010484(+)	63948	0.464262	1	0.371401	No		NC_003062.2:2781724-2782207(-)	27735	0.201356	1	0.182379	No		NC_003062.2:2776476-2776986(+)	131894	0.95755	2	0.24863	No
NC_003063.2:375621-376650(+)	288286	2.09296	5	0.0614294	No		NC_003063.2:527313-529305(+)	63536	0.461271	1	0.369518	No		NC_003062.2:872848-873451(+)	191180	1.38797	2	0.404006	No
NC_003063.2:650446-651376(+)	39171	0.284381	1	0.24752	No		NC_003063.2:785353-786949(-)	37105	0.269382	1	0.236149	No		NC_003062.2:457932-458391(-)	40113	0.29122	2	0.0350052	No
NC_003062.2:981910-982099(+)	87371	0.634313	1	0.469701	No		NC_003062.2:1908656-1908962(-)	88254	0.640724	3	0.0273292	No		NC_003062.2:1080633-1081608(-)	4139	0.0300491	1	0.0296022	No
NC_003062.2:1258210-1259401(+)	100660	0.730792	1	0.518472	No		NC_003062.2:2776476-2776986(+)	139656	1.0139	2	0.269355	No		NC_003062.2:2791249-2791480(+)	74242	0.538997	2	0.102252	No
NC_003062.2:849384-849768(+)	9613	0.0697904	1	0.0674107	No		NC_003062.2:872848-873451(+)	206547	1.49953	1	0.776765	No		NC_003062.2:142960-143587(-)	44450	0.322707	1	0.275814	No
NC_003062.2:2627191-2627734(-)	78628	0.570839	1	0.434949	No		NC_003063.2:676546-677536(-)	61134	0.443833	1	0.358427	No		NC_003062.2:1913966-1914587(-)	158450	1.15035	1	0.683473	No
NC_003063.2:821771-822797(+)	229763	1.66808	1	0.811391	No		NC_003065.3:53577-54690(+)	35528	0.257933	1	0.227353	No		NC_003062.2:641450-642707(+)	56807	0.412419	2	0.0649124	No
NC_003062.2:1012324-1013434(+)	6355952	46.1442	61	0.0207065	No		NC_003063.2:1195648-1197856(-)	160298	1.16376	1	0.687691	No		NC_003063.2:1609890-1610745(-)	132071	0.958835	1	0.616661	No
NC_003062.2:1236503-1236968(-)	249696	1.81279	3	0.272807	No		NC_003063.2:1611582-1612485(-)	126622	0.919276	2	0.234578	No		NC_003062.2:2624794-2625757(-)	242477	1.76038	3	0.258795	No
NC_003063.2:1270147-1271677(+)	47748	0.34665	2	0.0478475	No		NC_003062.2:2128744-2129488(+)	72236	0.524433	1	0.408109	No		NC_003062.2:535779-536517(-)	5661	0.0410989	1	0.0402658	No
NC_003062.2:1526155-1526887(-)	453146	3.28984	3	0.638529	No		NC_003062.2:2127858-2128362(+)	43181	0.313494	1	0.269111	No		NC_003062.2:1839689-1840307(-)	399833	2.90279	3	0.554681	No
NC_003062.2:37588-39199(+)	270094	1.96088	2	0.583303	No		NC_003062.2:2791249-2791480(+)	81795	0.593832	2	0.119874	No		NC_003062.2:512098-513799(+)	35491	0.257665	1	0.227146	No
NC_003062.2:2525518-2526973(+)	123984	0.900124	2	0.227563	No		NC_003062.2:1591995-1593372(-)	21585	0.156707	1	0.145046	No		NC_003063.2:1668479-1670213(-)	122960	0.89269	1	0.590447	No
NC_003062.2:2081193-2082270(+)	50768	0.368576	1	0.308281	No		NC_003062.2:1913966-1914587(-)	156135	1.13354	1	0.678108	No		NC_003063.2:931281-932067(-)	54975	0.399118	1	0.329089	No
NC_003063.2:1672087-1673623(-)	408926	2.9688	3	0.569784	No		NC_003062.2:2788609-2788879(-)	98013	0.711574	1	0.509129	No		NC_003063.2:1143449-1144370(-)	323470	2.34839	1	0.904477	No
NC_003062.2:2618189-2619422(-)	194643	1.41311	1	0.756614	No		NC_003063.2:1609890-1610745(-)	147428	1.07033	1	0.657104	No		NC_003063.2:650446-651376(+)	59456	0.431651	1	0.350564	No
NC_003063.2:363090-364425(+)	510	0.0037026	1	0.00369575	No		NC_003062.2:685131-687141(+)	21620	0.156961	1	0.145263	No		NC_003063.2:1899043-1899541(-)	29158	0.211687	1	0.190782	No
NC_003062.2:1158422-1159754(+)	62721	0.455354	1	0.365777	No		NC_003062.2:2403812-2404082(-)	1255	0.0091113	1	0.00906992	No		NC_003062.2:1526897-1528520(-)	703573	5.10794	5	0.578238	No
NC_003062.2:1495960-1498681(-)	203880	1.48017	3	0.186192	No		NC_003062.2:2624794-2625757(-)	226664	1.64558	1	0.807099	No		NC_003063.2:200555-201242(-)	464088	3.36928	4	0.434915	No
NC_003062.2:591617-591965(-)	8705	0.0631983	1	0.0612427	No		NC_003062.2:1489939-1490983(-)	99083	0.719343	1	0.512928	No		NC_003062.2:981910-982099(+)	83246	0.604366	1	0.453579	No
NC_003062.2:602710-606538(-)	9123	0.066233	1	0.0640872	No		NC_003062.2:1839689-1840307(-)	427611	3.10446	2	0.81592	No		NC_003062.2:1385186-1386476(-)	269851	1.95912	2	0.582816	No
NC_003062.2:1917270-1919370(-)	554608	4.02645	5	0.376331	No		NC_003062.2:1581575-1581860(-)	56659	0.411344	1	0.337241	No		NC_003062.2:1853925-1855017(-)	51544	0.374209	1	0.312167	No
NC_003063.2:547912-548419(-)	74809	0.543113	1	0.419063	No		NC_003062.2:512098-513799(+)	44157	0.32058	1	0.274272	No		NC_003062.2:2666533-2666926(-)	16640	0.120806	1	0.113794	No
NC_003062.2:1595155-1595722(-)	71025	0.515641	2	0.0949841	No		NC_003063.2:1668479-1670213(-)	152119	1.10438	5	0.00552483	No		NC_003063.2:1572730-1573786(+)	48163	0.349663	1	0.295075	No
NC_003062.2:1461089-1462163(-)	113331	0.822783	1	0.560792	No		NC_003063.2:978115-978478(-)	19452	0.141222	1	0.131703	No		NC_003062.2:620728-622573(-)	139292	1.01126	5	0.00383538	No
NC_003062.2:2207781-2208666(-)	314279	2.28167	1	0.897886	No		NC_003062.2:510660-511050(+)	27010	0.196093	1	0.178064	No		NC_003062.2:1424709-1426131(+)	178210	1.2938	2	0.37098	No
NC_003063.2:817117-818128(+)	354397	2.57292	5	0.118775	No		NC_003062.2:2404214-2404811(+)	48504	0.352139	1	0.296818	No		NC_003062.2:2635680-2636610(+)	26862	0.195018	1	0.17718	No
NC_003063.2:1184113-1187074(+)	78121	0.567158	1	0.432865	No		NC_003063.2:1143449-1144370(-)	353673	2.56767	4	0.256981	No		NC_003062.2:1667570-1668140(-)	37159	0.269774	1	0.236448	No
NC_003062.2:1653072-1653306(+)	328945	2.38814	4	0.218802	No		NC_003062.2:1007539-1007887(-)	9162	0.0665161	1	0.0643522	No		NC_003062.2:966100-967672(+)	26780	0.194423	1	0.17669	No
NC_003062.2:924472-924748(-)	14150	0.102729	1	0.0976285	No		NC_003062.2:1526897-1528520(-)	557204	4.0453	2	0.911685	No		NC_003063.2:545968-547903(-)	18630	0.135254	1	0.126506	No
NC_003063.2:1480979-1481480(+)	77270	0.56098	1	0.429351	No		NC_003063.2:200555-201242(-)	544522	3.95323	3	0.754963	No		NC_003062.2:1848283-1849498(+)	252089	1.83017	3	0.27747	No
NC_003062.2:2623567-2624761(-)	587757	4.26712	4	0.616904	No		NC_003062.2:2751304-2754403(-)	113400	0.823284	1	0.561012	No		NC_003063.2:1010495-1011305(+)	22345	0.162225	1	0.14975	No
NC_003063.2:1592332-1593646(+)	269998	1.96019	4	0.135765	No		NC_003062.2:981910-982099(+)	77603	0.563398	1	0.430728	No		NC_003062.2:398431-400057(-)	82332	0.59773	1	0.449941	No
NC_003063.2:790999-792946(-)	316144	2.29521	5	0.0831912	No		NC_003062.2:1385186-1386476(-)	264739	1.92201	1	0.853687	No		NC_003062.2:866011-866782(-)	32721	0.237554	1	0.211446	No
NC_003063.2:1836913-1837720(+)	31250	0.226875	1	0.20298	No		NC_003062.2:323104-323740(+)	27829	0.202039	1	0.182937	No		NC_003063.2:691506-692238(-)	37028	0.268823	1	0.235722	No
NC_003062.2:2208688-2209972(-)	358830	2.60511	1	0.926105	No		NC_003062.2:209584-211141(-)	189977	1.37923	1	0.748228	No		NC_003063.2:413488-414418(-)	89819	0.652086	1	0.479042	No
NC_003062.2:895876-896287(+)	245783	1.78438	2	0.532501	No		NC_003063.2:1572730-1573786(+)	54684	0.397006	1	0.32767	No		NC_003062.2:2486545-2488141(-)	156354	1.13513	3	0.106759	No
NC_003065.3:98862-101373(+)	20907	0.151785	1	0.140827	No		NC_003062.2:620728-622573(-)	139190	1.01052	1	0.63597	No		NC_003062.2:126204-128106(-)	448275	3.25448	4	0.409585	No
NC_003063.2:1573836-1575474(+)	382892	2.7798	1	0.937949	No		NC_003062.2:160405-160825(+)	20334	0.147625	1	0.137245	No		NC_003062.2:2628734-2630576(-)	223465	1.62236	5	0.0249355	No
NC_003063.2:850302-851748(+)	35247	0.255893	1	0.225775	No		NC_003063.2:1088569-1091539(-)	38667	0.280722	1	0.244762	No		NC_003062.2:1910466-1910703(-)	224056	1.62665	2	0.483634	No
NC_003062.2:1248880-1251298(+)	455845	3.30943	3	0.642465	No		NC_003062.2:1848283-1849498(+)	286741	2.08174	4	0.157919	No		NC_003062.2:2061154-2062255(-)	10406	0.0755476	1	0.0727644	No
NC_003063.2:520201-521440(-)	23268	0.168926	1	0.155428	No		NC_003063.2:1010495-1011305(+)	35302	0.256293	1	0.226084	No		NC_003062.2:717655-718141(+)	112626	0.817665	1	0.558539	No
NC_003063.2:787032-788211(-)	153980	1.11789	2	0.307517	No		NC_003062.2:1522135-1523719(-)	173353	1.25854	1	0.715932	No		NC_003063.2:1147852-1148869(-)	453865	3.29506	3	0.63958	No
NC_003062.2:1909542-1909851(-)	66270	0.48112	4	0.00152413	No		NC_003063.2:130447-130945(-)	64218	0.466223	1	0.372632	No		NC_003062.2:1932034-1932553(-)	408803	2.96791	7	0.0319167	No
NC_003062.2:465099-465423(+)	14766	0.107201	1	0.101655	No		NC_003062.2:2486545-2488141(-)	146847	1.06611	2	0.288544	No		NC_003062.2:1267018-1269016(+)	110806	0.804452	1	0.552667	No
NC_003062.2:1786404-1787559(-)	22121	0.160598	1	0.148366	No		NC_003062.2:126204-128106(-)	254106	1.84481	2	0.550362	No		NC_003063.2:821771-822797(+)	353846	2.56892	4	0.257253	No
NC_003062.2:31881-33282(-)	304337	2.20949	6	0.0253639	No		NC_003062.2:1256219-1256585(+)	23434	0.170131	1	0.156446	No		NC_003063.2:659149-659356(-)	8257	0.0599458	1	0.0581844	No
NC_003062.2:99145-99469(-)	57471	0.417239	1	0.341137	No		NC_003062.2:2628734-2630576(-)	232773	1.68993	3	0.240121	No		NC_003062.2:109822-110032(+)	114777	0.833281	1	0.565379	No
NC_003062.2:1907668-1908202(-)	281826	2.04606	3	0.335788	No		NC_003062.2:1910466-1910703(-)	181355	1.31664	1	0.731965	No		NC_003062.2:2604716-2606171(-)	418571	3.03883	2	0.806576	No
NC_003063.2:1197855-1200318(-)	428102	3.10802	4	0.376954	No		NC_003063.2:1147852-1148869(-)	749525	5.44155	9	0.100749	No		NC_003062.2:1910714-1910915(-)	104847	0.761189	2	0.17733	No
NC_003063.2:377499-378549(+)	606636	4.40418	2	0.933928	No		NC_003062.2:1932034-1932553(-)	391946	2.84553	4	0.318207	No		NC_003062.2:1933607-1934039(-)	112315	0.815407	1	0.557541	No
NC_003063.2:1612487-1613387(-)	306370	2.22425	1	0.891851	No		NC_003063.2:328524-329244(-)	19625	0.142478	1	0.132793	No		NC_003063.2:1542331-1544836(+)	321397	2.33334	2	0.676762	No
NC_003062.2:2048962-2050294(-)	103418	0.750815	2	0.173647	No		NC_003062.2:2325654-2326719(-)	192196	1.39534	1	0.752252	No		NC_003062.2:1012324-1013434(+)	5981845	43.4282	54	0.0669636	No
NC_003062.2:1236033-1236501(-)	139773	1.01475	4	0.019906	No		NC_003062.2:1423771-1424692(+)	100601	0.730363	1	0.518266	No		NC_003062.2:1927197-1931334(-)	258253	1.87492	2	0.559081	No
NC_003062.2:678037-678334(-)	294700	2.13952	2	0.630443	No		NC_003063.2:821771-822797(+)	353600	2.56714	2	0.726204	No		NC_003063.2:1448189-1449101(+)	185426	1.34619	1	0.739771	No
NC_003062.2:1565884-1566658(+)	20926	0.151923	1	0.140945	No		NC_003063.2:1517413-1518115(-)	84181	0.611154	1	0.457276	No		NC_003063.2:1569514-1570216(-)	11592	0.0841579	1	0.0807139	No
NC_003062.2:129977-130970(+)	210640	1.52925	2	0.451915	No		NC_003062.2:2627939-2628719(-)	103856	0.753995	4	0.00742564	No		NC_003062.2:2744506-2745193(+)	77869	0.565329	2	0.110622	No
NC_003063.2:1298942-1301567(+)	381049	2.76642	1	0.937113	No		NC_003063.2:1159338-1160337(-)	58625	0.425617	1	0.346634	No		NC_003062.2:2707487-2708150(-)	35714	0.259284	1	0.228396	No
NC_003062.2:1932909-1933605(-)	223447	1.62223	4	0.0819064	No		NC_003062.2:1012324-1013434(+)	6969592	50.5992	61	0.0849406	No		NC_003062.2:1575228-1575924(-)	28686	0.20826	1	0.188004	No
NC_003062.2:596389-597487(+)	265399	1.9268	4	0.129915	No		NC_003063.2:1270147-1271677(+)	144321	1.04777	1	0.649281	No		NC_003062.2:2593745-2593997(+)	75309	0.546743	1	0.421168	No
NC_003063.2:1232023-1233628(+)	740542	5.37633	4	0.783889	No		NC_003063.2:1119313-1120234(+)	218765	1.58823	1	0.795714	No		NC_003062.2:2415171-2416074(+)	55717	0.404505	2	0.062764	No
NC_003063.2:556990-557392(+)	82359	0.597926	1	0.450049	No		NC_003063.2:1448189-1449101(+)	132409	0.961289	2	0.250004	No		NC_003062.2:37588-39199(+)	259776	1.88597	1	0.848319	No
NC_003062.2:44643-45126(+)	47937	0.348023	2	0.0481843	No		NC_003062.2:2744506-2745193(+)	116876	0.84852	1	0.571952	No		NC_003063.2:674530-676435(-)	10635	0.0772101	1	0.0743047	No
NC_003062.2:131052-132558(+)	15514	0.112632	1	0.10652	No		NC_003062.2:1526155-1526887(-)	342274	2.48491	1	0.916667	No		NC_003062.2:533118-534081(-)	603159	4.37893	2	0.932555	No
NC_003063.2:1479995-1480472(+)	592952	4.30483	1	0.986497	No		NC_003063.2:523970-524444(+)	54601	0.396403	1	0.327265	No		NC_003062.2:534106-534364(-)	18899	0.137207	1	0.12821	No
NC_003062.2:1721994-1723365(-)	140147	1.01747	2	0.270667	No		NC_003062.2:1909863-1910232(-)	147499	1.07084	2	0.290282	No		NC_003062.2:2198731-2199340(+)	241062	1.75011	1	0.826245	No
NC_003063.2:563121-563436(-)	8983	0.0652166	1	0.0631355	No		NC_003062.2:1822725-1824033(+)	23482	0.170479	1	0.156739	No		NC_003063.2:1764067-1765123(-)	29140	0.211556	1	0.190676	No
NC_003062.2:1525990-1526143(-)	48652	0.353214	1	0.297573	No		NC_003062.2:37588-39199(+)	269395	1.95581	4	0.134992	No		NC_003062.2:243979-244561(+)	9642	0.0700009	1	0.067607	No
NC_003062.2:1909863-1910232(-)	128891	0.935749	1	0.607708	No		NC_003062.2:2748782-2749274(+)	30358	0.220399	1	0.197801	No		NC_003062.2:1705486-1708330(-)	42653	0.309661	1	0.266304	No
NC_003062.2:2198731-2199340(+)	236138	1.71436	3	0.246573	No		NC_003062.2:2525518-2526973(+)	99134	0.719713	1	0.513108	No		NC_003063.2:835768-835945(-)	485371	3.52379	4	0.468493	No
NC_003063.2:1141761-1142289(+)	188949	1.37177	3	0.159722	No		NC_003062.2:533118-534081(-)	605791	4.39804	3	0.814625	No		NC_003062.2:683917-684547(+)	22171	0.160961	1	0.148675	No
NC_003063.2:1606686-1607652(+)	148251	1.0763	5	0.00496894	No		NC_003062.2:1680159-1681209(+)	14453	0.104929	1	0.0996114	No		NC_003062.2:1599894-1601286(+)	115111	0.835706	1	0.566432	No
NC_003062.2:272421-272817(+)	210919	1.53127	7	0.00104167	No		NC_003062.2:615683-616559(+)	57460	0.41716	2	0.0662112	No		NC_003063.2:1635023-1635803(+)	44545	0.323397	2	0.0422754	No
NC_003062.2:226492-228076(-)	36075	0.261904	2	0.0288578	No		NC_003062.2:2198731-2199340(+)	199601	1.4491	2	0.424998	No		NC_003062.2:2098160-2099543(+)	20557	0.149244	1	0.138641	No
NC_003062.2:935236-936337(-)	336789	2.44509	3	0.442026	No		NC_003062.2:1337984-1344332(-)	218244	1.58445	1	0.79494	No		NC_003062.2:2607104-2608634(-)	407264	2.95674	3	0.567048	No
NC_003062.2:2209986-2210565(-)	211150	1.53295	2	0.453141	No		NC_003063.2:851897-852272(+)	43393	0.315033	1	0.270235	No		NC_003062.2:2840339-2841374(-)	20654	0.149948	1	0.139247	No
NC_003062.2:290154-291135(-)	103678	0.752702	1	0.528908	No		NC_003063.2:835768-835945(-)	330519	2.39957	2	0.691465	No		NC_003062.2:1940052-1940502(-)	61927	0.44959	2	0.0753216	No
NC_003062.2:2193589-2195107(-)	1042886	7.57135	11	0.143959	No		NC_003062.2:1902957-1903326(-)	115177	0.836185	1	0.566639	No		NC_003063.2:795619-796153(-)	156283	1.13461	2	0.313623	No
NC_003062.2:1906604-1907174(-)	120255	0.873051	3	0.0584931	No		NC_003063.2:1612487-1613387(-)	383051	2.78095	2	0.765658	No		NC_003062.2:313690-314467(-)	11467	0.0832504	1	0.0798793	No
NC_003063.2:815072-817055(+)	159748	1.15977	1	0.686442	No		NC_003063.2:1483947-1484904(+)	47659	0.346004	1	0.292491	No		NC_003062.2:2741201-2742209(+)	10518	0.0763607	1	0.073518	No
NC_003062.2:2416526-2418863(-)	86366	0.627017	1	0.465817	No		NC_003062.2:110443-111835(-)	53836	0.390849	1	0.323518	No		NC_003062.2:2788919-2789234(-)	116600	0.846516	2	0.208017	No
NC_003062.2:1908656-1908962(-)	95643	0.694368	1	0.50061	No		NC_003062.2:19640-19961(-)	31309	0.227303	1	0.203321	No		NC_003062.2:1922807-1927016(-)	530058	3.84822	1	0.978682	No
NC_003063.2:1472384-1473779(-)	25188	0.182865	1	0.167119	No		NC_003063.2:795619-796153(-)	205097	1.489	1	0.774403	No		NC_003063.2:1011312-1012923(+)	70917	0.514857	2	0.0947427	No
NC_003062.2:535779-536517(-)	23309	0.169223	1	0.15568	No		NC_003062.2:2111388-2111598(-)	48831	0.354513	1	0.298485	No		NC_003062.2:2106377-2107742(-)	279868	2.03184	4	0.148668	No
NC_003062.2:1463521-1464496(+)	74289	0.539338	1	0.416866	No		NC_003062.2:558160-558832(+)	34831	0.252873	1	0.223434	No		NC_003063.2:1473833-1475315(-)	347669	2.52408	7	0.0148688	No
NC_003062.2:1839689-1840307(-)	379249	2.75335	1	0.936286	No		NC_003062.2:1158422-1159754(+)	83023	0.602747	1	0.452694	No		NC_003062.2:1902429-1902819(-)	158562	1.15116	3	0.110098	No
NC_003062.2:1526897-1528520(-)	782005	5.67736	10	0.0635	No		NC_003063.2:517904-519182(-)	118044	0.856999	2	0.211827	No		NC_003062.2:1160108-1161398(+)	97457	0.707538	1	0.507144	No
NC_003062.2:860239-860635(+)	63512	0.461097	1	0.369409	No		NC_003062.2:2686733-2687273(+)	69101	0.501673	1	0.394483	No		NC_003062.2:2087407-2088298(-)	18125	0.131587	1	0.123297	No
NC_003062.2:2047118-2048870(-)	387705	2.81474	2	0.771419	No		NC_003062.2:2788919-2789234(-)	120260	0.873088	1	0.58234	No		NC_003062.2:1021176-1021746(-)	45745	0.332109	1	0.282591	No
NC_003062.2:1424709-1426131(+)	172695	1.25377	1	0.714572	No		NC_003063.2:1306724-1307114(-)	18360	0.133294	1	0.124792	No		NC_003062.2:867116-867998(+)	57389	0.416644	1	0.340745	No
NC_003062.2:966100-967672(+)	57606	0.41822	1	0.341782	No		NC_003062.2:860642-861074(-)	103	0.00074778	1	0.0007475	No		NC_003063.2:1542069-1542357(+)	84401	0.612751	1	0.458142	No
NC_003064.2:442068-442545(+)	39148	0.284214	1	0.247395	No		NC_003062.2:1922807-1927016(-)	604223	4.38666	1	0.987558	No		NC_003062.2:2592157-2593201(-)	390453	2.83469	3	0.538774	No
NC_003062.2:1522135-1523719(-)	184547	1.33981	1	0.738105	No		NC_003063.2:1011312-1012923(+)	109341	0.793816	1	0.547884	No		NC_003062.2:660203-661637(+)	14240	0.103382	1	0.0982179	No
NC_003062.2:126204-128106(-)	766309	5.5634	7	0.323953	No		NC_003062.2:2106377-2107742(-)	251720	1.82749	1	0.839183	No		NC_003063.2:1157178-1158240(-)	14762	0.107172	1	0.101629	No
NC_003062.2:1910466-1910703(-)	256079	1.85913	1	0.844192	No		NC_003063.2:1473833-1475315(-)	326962	2.37374	4	0.215808	No		NC_003062.2:1368004-1368772(+)	195659	1.42048	2	0.415218	No
NC_003062.2:2255100-2255553(+)	353532	2.56664	1	0.923207	No		NC_003062.2:1160108-1161398(+)	76569	0.555891	2	0.107602	No		NC_003062.2:2120105-2123879(-)	26698	0.193827	1	0.1762	No
NC_003062.2:1270545-1271988(+)	123687	0.897968	2	0.226774	No		NC_003062.2:2604716-2606171(-)	395459	2.87103	3	0.547304	No		NC_003062.2:1170830-1171394(+)	13518	0.0981407	1	0.0934786	No
NC_003062.2:1548368-1550942(-)	63926	0.464103	1	0.371301	No		NC_003062.2:84464-86606(-)	45022	0.32686	1	0.278815	No		NC_003063.2:1141761-1142289(+)	172157	1.24986	1	0.713455	No
NC_003062.2:2742304-2744260(-)	78033	0.56652	2	0.111005	No		NC_003063.2:1451681-1452413(+)	43046	0.312514	1	0.268395	No		NC_003063.2:860824-861712(-)	82043	0.595632	2	0.120465	No
NC_003063.2:930599-931295(-)	159681	1.15928	2	0.322609	No		NC_003062.2:1021176-1021746(-)	51649	0.374972	1	0.312691	No		NC_003062.2:534487-535408(-)	655175	4.75657	1	0.991405	No
NC_003062.2:2593745-2593997(+)	90052	0.653778	1	0.479923	No		NC_003063.2:372477-373743(+)	49758	0.361243	1	0.30319	No		NC_003063.2:1606686-1607652(+)	120531	0.875055	2	0.218404	No
NC_003063.2:521484-522612(-)	60482	0.439099	2	0.0723325	No		NC_003062.2:961120-961549(+)	11326	0.0822268	1	0.0789369	No		NC_003062.2:1917270-1919370(-)	576015	4.18187	6	0.243901	No
NC_003062.2:622764-623781(-)	76987	0.558926	1	0.428177	No		NC_003062.2:2592157-2593201(-)	368924	2.67839	4	0.281149	No		NC_003062.2:229626-229818(-)	78212	0.567819	1	0.43324	No
NC_003062.2:534106-534364(-)	22019	0.159858	1	0.147735	No		NC_003062.2:660203-661637(+)	18290	0.132785	1	0.124347	No		NC_003064.2:14660-15074(+)	12998	0.0943655	1	0.0900499	No
NC_003062.2:19640-19961(-)	97158	0.705367	3	0.0347978	No		NC_003062.2:627773-628325(+)	7137	0.0518146	1	0.0504951	No		NC_003062.2:1907668-1908202(-)	251935	1.82905	2	0.54575	No
NC_003062.2:2104071-2105460(-)	64964	0.471639	1	0.376021	No		NC_003063.2:524523-525696(+)	60061	0.436043	1	0.35341	No		NC_003062.2:614536-615565(+)	474382	3.44401	4	0.451239	No
NC_003062.2:763516-765226(+)	51728	0.375545	1	0.313085	No		NC_003062.2:1368004-1368772(+)	196031	1.42319	4	0.0563746	No		NC_003062.2:252996-253401(+)	192193	1.39532	1	0.752247	No
NC_003062.2:2741201-2742209(+)	45710	0.331855	2	0.0442723	No		NC_003062.2:389380-390877(+)	30202	0.219267	1	0.196892	No		NC_003062.2:547645-548185(+)	22208	0.16123	1	0.148904	No
NC_003062.2:2175937-2176435(+)	6482	0.0470593	1	0.0459692	No		NC_003063.2:1480979-1481480(+)	74110	0.538039	3	0.0174368	No		NC_003063.2:825026-825542(+)	98689	0.716482	2	0.161554	No
NC_003062.2:1021176-1021746(-)	79498	0.577155	1	0.438507	No		NC_003062.2:727574-728507(+)	99334	0.721165	1	0.513814	No		NC_003062.2:2445402-2445891(+)	30574	0.221967	1	0.199058	No
NC_003062.2:1581974-1583324(-)	122076	0.886272	1	0.58781	No		NC_003063.2:1141761-1142289(+)	158728	1.15237	1	0.684111	No		NC_003062.2:305092-306061(-)	19410	0.140917	1	0.131438	No
NC_003063.2:990074-991145(-)	107610	0.781249	1	0.542166	No		NC_003062.2:2169618-2170821(-)	142609	1.03534	1	0.644895	No		NC_003062.2:1912796-1913633(-)	395173	2.86896	8	0.0093126	No
NC_003063.2:860824-861712(-)	102910	0.747127	3	0.0401246	No		NC_003062.2:534487-535408(-)	598597	4.34581	7	0.149717	No		NC_003062.2:2766766-2771524(+)	357948	2.5987	1	0.92563	No
NC_003062.2:2530419-2530608(+)	22838	0.165804	1	0.152788	No		NC_003062.2:1915409-1915718(-)	68961	0.500657	1	0.393868	No		NC_003062.2:36524-37250(-)	32658	0.237097	1	0.211085	No
NC_003062.2:534487-535408(-)	523934	3.80376	10	0.00583768	No		NC_003062.2:1917270-1919370(-)	493610	3.58361	3	0.69434	No		NC_003062.2:158273-159497(-)	28121	0.204158	1	0.184667	No
NC_003063.2:194586-195906(+)	108881	0.790476	3	0.046063	No		NC_003062.2:229626-229818(-)	89791	0.651883	1	0.478936	No		NC_003062.2:2056027-2057443(-)	23214	0.168534	1	0.155097	No
NC_003062.2:260480-261431(-)	76585	0.556007	1	0.426506	No		NC_003062.2:260480-261431(-)	53254	0.386624	1	0.320654	No		NC_003063.2:817117-818128(+)	242984	1.76406	2	0.526386	No
NC_003062.2:1269015-1270527(+)	149912	1.08836	1	0.663232	No		NC_003062.2:614536-615565(+)	514466	3.73502	2	0.886963	No		NC_003062.2:1650701-1652180(-)	251812	1.82816	2	0.545488	No
NC_003063.2:825026-825542(+)	149845	1.08787	4	0.0248558	No		NC_003062.2:1269015-1270527(+)	90771	0.658997	1	0.48263	No		NC_003062.2:255543-257967(+)	20818	0.151139	1	0.140272	No
NC_003062.2:1789578-1789827(-)	20261	0.147095	1	0.136788	No		NC_003063.2:825026-825542(+)	115671	0.839771	1	0.568191	No		NC_003062.2:2302562-2303486(-)	23263	0.168889	1	0.155398	No
NC_003062.2:2457273-2457915(+)	8965	0.0650859	1	0.063013	No		NC_003062.2:1912796-1913633(-)	386235	2.80407	1	0.939437	No		NC_003062.2:1932909-1933605(-)	241786	1.75537	1	0.827156	No
NC_003063.2:549016-550453(+)	55860	0.405544	1	0.333386	No		NC_003062.2:1461089-1462163(-)	83135	0.60356	1	0.453139	No		NC_003062.2:1653072-1653306(+)	389462	2.82749	8	0.00858765	No
NC_003062.2:8063-10499(+)	65927	0.47863	2	0.083794	No		NC_003062.2:2766766-2771524(+)	352220	2.55712	2	0.724224	No		NC_003062.2:2129644-2129980(-)	57396	0.416695	1	0.340778	No
NC_003062.2:2322832-2324029(-)	51277	0.372271	1	0.310833	No		NC_003062.2:1421589-1422864(+)	149580	1.08595	1	0.662419	No		NC_003062.2:526538-526838(-)	8920	0.0647592	1	0.0627069	No
NC_003062.2:1933607-1934039(-)	117581	0.853638	1	0.574137	No		NC_003063.2:1635023-1635803(+)	35930	0.260852	2	0.028646	No		NC_003063.2:376707-377493(+)	44447	0.322685	1	0.275798	No
NC_003063.2:376707-377493(+)	629291	4.56865	8	0.0923486	No		NC_003063.2:817117-818128(+)	278459	2.02161	3	0.329173	No		NC_003062.2:2630583-2630964(-)	20862	0.151458	1	0.140546	No
NC_003063.2:820377-821580(+)	43048	0.312528	1	0.268405	No		NC_003063.2:825695-825917(-)	10443	0.0758162	1	0.0730134	No		NC_003063.2:361095-361776(-)	98071	0.711995	1	0.509336	No
NC_003062.2:1385186-1386476(-)	367234	2.66612	2	0.745126	No		NC_003062.2:1650701-1652180(-)	254553	1.84805	2	0.551308	No		NC_003063.2:1009716-1010484(+)	66237	0.480881	3	0.0129796	No
NC_003062.2:2004068-2005187(-)	39196	0.284563	1	0.247657	No		NC_003062.2:1932909-1933605(-)	168680	1.22462	2	0.346251	No		NC_003062.2:1905890-1906370(-)	135002	0.980115	2	0.256926	No
NC_003063.2:1517413-1518115(-)	88487	0.642416	1	0.47398	No		NC_003062.2:1653072-1653306(+)	272535	1.9786	2	0.588172	No		NC_003063.2:1672087-1673623(-)	491536	3.56855	3	0.691646	No
NC_003062.2:2367707-2368397(+)	545544	3.96065	2	0.905496	No		NC_003065.3:97821-98859(+)	31277	0.227071	2	0.022191	No		NC_003062.2:1536179-1536566(-)	7130	0.0517638	1	0.0504469	No
NC_003062.2:597568-598726(+)	46248	0.33576	1	0.285206	No		NC_003062.2:2630583-2630964(-)	26959	0.195722	1	0.177759	No		NC_003062.2:716705-716933(+)	112523	0.816917	2	0.197301	No
NC_003062.2:1373180-1374314(+)	14632	0.106228	1	0.100781	No		NC_003063.2:807317-808319(+)	36647	0.266057	1	0.233605	No		NC_003062.2:2785976-2787044(-)	9893	0.0718232	1	0.0693046	No
NC_003063.2:1448189-1449101(+)	53317	0.387081	1	0.320964	No		NC_003062.2:1905890-1906370(-)	109548	0.795318	1	0.548563	No		NC_003062.2:1251587-1251863(+)	311256	2.25972	1	0.89562	No
NC_003062.2:1669726-1671619(+)	1712	0.0124291	1	0.0123522	No		NC_003063.2:1672087-1673623(-)	511961	3.71684	1	0.975689	No		NC_003062.2:2004068-2005187(-)	44822	0.325408	1	0.277767	No
NC_003063.2:1222755-1224456(+)	484136	3.51483	4	0.466563	No		NC_003062.2:716705-716933(+)	143508	1.04187	1	0.647205	No		NC_003063.2:370823-371021(-)	60958	0.442555	1	0.357607	No
NC_003062.2:1703755-1705033(-)	54198	0.393477	1	0.325293	No		NC_003062.2:1571702-1572923(-)	61996	0.450091	1	0.36243	No		NC_003062.2:2367707-2368397(+)	397427	2.88532	3	0.550633	No
NC_003062.2:2782365-2782854(-)	688392	4.99773	2	0.959496	No		NC_003062.2:1426571-1427789(+)	77603	0.563398	1	0.430728	No		NC_003062.2:1931597-1931975(-)	212339	1.54158	4	0.0709693	No
NC_003062.2:1848283-1849498(+)	325205	2.36099	2	0.682968	No		NC_003063.2:1297792-1298578(+)	80328	0.583181	2	0.116395	No		NC_003063.2:566147-567014(-)	80424	0.583878	1	0.442269	No
NC_003062.2:1754244-1755654(+)	225384	1.63629	1	0.805299	No		NC_003063.2:1232023-1233628(+)	699661	5.07954	1	0.993777	No		NC_003062.2:2623567-2624761(-)	559891	4.06481	4	0.579088	No
NC_003062.2:563638-564112(+)	70550	0.512193	3	0.015329	No		NC_003063.2:790999-792946(-)	122537	0.889619	1	0.589188	No		NC_003062.2:558937-560215(+)	144176	1.04672	1	0.648912	No
NC_003062.2:1911379-1912111(-)	253969	1.84381	1	0.841787	No		NC_003062.2:1251587-1251863(+)	232624	1.68885	3	0.239836	No		NC_003062.2:1581974-1583324(-)	100979	0.733108	2	0.167391	No
NC_003062.2:1374513-1376838(+)	605676	4.39721	5	0.448281	No		NC_003062.2:1215423-1216155(+)	44205	0.320928	1	0.274525	No		NC_003062.2:1595155-1595722(-)	72222	0.524332	3	0.0162999	No
NC_003062.2:1086145-1086382(+)	122751	0.891172	1	0.589825	No		NC_003062.2:2367707-2368397(+)	494458	3.58977	4	0.482607	No		NC_003063.2:1612487-1613387(-)	348853	2.53267	2	0.719342	No
NC_003064.2:475926-476673(-)	80573	0.58496	1	0.442872	No		NC_003062.2:1931597-1931975(-)	163863	1.18965	1	0.695671	No		NC_003062.2:1517217-1517544(+)	20753	0.150667	1	0.139866	No
NC_003062.2:143593-145597(-)	143245	1.03996	1	0.646531	No		NC_003063.2:566147-567014(-)	70728	0.513485	2	0.0943208	No		NC_003062.2:2329105-2329612(-)	70336	0.510639	1	0.399888	No
NC_003062.2:750515-751616(-)	2832	0.0205603	1	0.0203504	No		NC_003062.2:2623567-2624761(-)	494585	3.59069	4	0.482804	No		NC_003062.2:1120602-1121259(+)	1025690	7.44651	12	0.07615	No
NC_003062.2:1705486-1708330(-)	59200	0.429792	2	0.0697138	No		NC_003062.2:558937-560215(+)	174211	1.26477	1	0.717696	No		NC_003062.2:1099853-1101347(+)	27853	0.202213	1	0.183079	No
NC_003063.2:807317-808319(+)	138453	1.00517	2	0.266143	No		NC_003062.2:1581974-1583324(-)	71605	0.519852	1	0.405392	No		NC_003062.2:172979-174116(-)	9901	0.0718813	1	0.0693586	No
NC_003062.2:822481-822823(-)	585314	4.24938	5	0.419761	No		NC_003062.2:1595155-1595722(-)	79415	0.576553	1	0.438168	No		NC_003062.2:2619475-2622472(-)	824094	5.98292	5	0.712651	No
NC_003062.2:783198-784497(-)	52715	0.382711	1	0.31799	No		NC_003062.2:104796-105375(+)	99059	0.719168	2	0.162495	No		NC_003062.2:2394504-2395623(-)	179938	1.30635	3	0.144352	No
NC_003062.2:2778849-2780178(-)	343621	2.49469	2	0.711611	No		NC_003062.2:1120602-1121259(+)	932347	6.76884	11	0.082927	No		NC_003062.2:607140-608841(+)	148913	1.08111	2	0.294048	No
NC_003062.2:558937-560215(+)	177233	1.28671	2	0.368462	No		NC_003063.2:1486451-1486757(+)	24512	0.177957	1	0.163022	No		NC_003063.2:1286218-1286665(-)	54819	0.397986	1	0.328329	No
NC_003063.2:986082-987804(-)	278868	2.02458	3	0.329977	No		NC_003062.2:1373180-1374314(+)	13683	0.0993386	1	0.0945639	No		NC_003063.2:1222755-1224456(+)	606623	4.40408	8	0.0788973	No
NC_003063.2:1656371-1657280(-)	42530	0.308768	1	0.265649	No		NC_003062.2:2394504-2395623(-)	220740	1.60257	2	0.4759	No		NC_003063.2:1213073-1214231(+)	18147	0.131747	1	0.123437	No
NC_003062.2:2776476-2776986(+)	150786	1.09471	1	0.665362	No		NC_003062.2:607140-608841(+)	165367	1.20056	1	0.698976	No		NC_003062.2:676327-677962(-)	2198235	15.9592	16	0.529201	No
NC_003062.2:753121-753424(+)	55546	0.403264	1	0.331864	No		NC_003063.2:1222755-1224456(+)	527215	3.82758	4	0.532141	No		NC_003063.2:1836913-1837720(+)	56042	0.406865	2	0.063402	No
NC_003062.2:1262251-1264333(+)	301108	2.18604	3	0.373542	No		NC_003063.2:1667534-1668359(-)	36771	0.266957	1	0.234294	No		NC_003062.2:2782365-2782854(-)	518063	3.76114	4	0.518532	No
NC_003063.2:930047-930587(-)	33750	0.245025	1	0.217315	No		NC_003062.2:676327-677962(-)	898899	6.52601	5	0.779222	No		NC_003062.2:2007791-2008298(+)	46686	0.33894	1	0.287475	No
NC_003063.2:1274539-1278226(-)	53789	0.390508	1	0.323287	No		NC_003062.2:1460698-1461061(-)	80906	0.587378	1	0.444217	No		NC_003062.2:2180676-2180940(-)	21622	0.156976	1	0.145275	No
NC_003062.2:1834233-1834569(+)	40935	0.297188	1	0.257096	No		NC_003062.2:352674-353817(+)	54855	0.398247	1	0.328504	No		NC_003063.2:1144404-1145352(-)	98729	0.716773	3	0.0362139	No
NC_003062.2:1715188-1716034(+)	230794	1.67556	4	0.0895685	No		NC_003062.2:2782365-2782854(-)	387682	2.81457	3	0.534013	No		NC_003062.2:1910927-1911341(-)	116409	0.845129	2	0.207514	No
NC_003063.2:1475983-1477039(-)	105637	0.766925	1	0.535561	No		NC_003063.2:1460755-1464235(-)	59193	0.429741	1	0.349323	No		NC_003063.2:982525-983545(-)	10256	0.0744586	1	0.0717541	No
NC_003063.2:373806-374781(+)	242220	1.75852	1	0.8277	No		NC_003062.2:2055065-2056031(-)	65089	0.472546	1	0.376587	No		NC_003062.2:895876-896287(+)	185150	1.34419	1	0.739249	No
NC_003063.2:966600-967581(+)	27088	0.196659	1	0.178529	No		NC_003062.2:2619475-2622472(-)	729514	5.29627	7	0.282293	No		NC_003062.2:2102929-2104075(-)	200285	1.45407	2	0.426686	No
NC_003062.2:324365-324938(-)	568651	4.12841	9	0.0254367	No		NC_003062.2:895876-896287(+)	182764	1.32687	3	0.149119	No		NC_003063.2:1831051-1831294(-)	70741	0.51358	3	0.0154382	No
NC_003062.2:822931-823915(-)	16387	0.11897	1	0.112165	No		NC_003062.2:2102929-2104075(-)	146855	1.06617	1	0.655674	No		NC_003062.2:1017628-1018513(+)	51916	0.37691	1	0.314022	No
NC_003062.2:1521638-1522139(-)	63022	0.45754	1	0.367161	No		NC_003062.2:1690537-1691278(-)	56807	0.412419	1	0.337953	No		NC_003062.2:1593623-1595012(-)	9563	0.0694274	1	0.0670721	No
NC_003063.2:1475408-1475918(-)	286339	2.07882	3	0.344647	No		NC_003062.2:876144-876552(+)	88141	0.639904	1	0.472657	No		NC_003062.2:717012-717654(+)	156597	1.13689	1	0.679186	No
NC_003063.2:1008351-1009593(+)	221021	1.60461	2	0.476558	No		NC_003062.2:717012-717654(+)	156737	1.13791	1	0.679512	No		NC_003063.2:317716-318883(+)	31201	0.226519	2	0.0220913	No
NC_003063.2:1668479-1670213(-)	107151	0.777916	1	0.540638	No		NC_003062.2:1617733-1620247(-)	358840	2.60518	2	0.733614	No		NC_003062.2:1904216-1905557(-)	89253	0.647977	1	0.476897	No
NC_003063.2:439934-440966(-)	71266	0.517391	1	0.403926	No		NC_003062.2:351086-352142(+)	126115	0.915595	5	0.00252216	No		NC_003062.2:1617733-1620247(-)	450708	3.27214	2	0.837978	No
NC_003063.2:1336284-1336665(-)	43635	0.31679	1	0.271516	No		NC_003063.2:951537-951771(+)	13660	0.0991716	1	0.0944127	No		NC_003062.2:351086-352142(+)	109989	0.79852	2	0.190676	No
NC_003062.2:1251587-1251863(+)	486625	3.5329	4	0.470449	No		NC_003062.2:2078085-2078823(-)	24888	0.180687	1	0.165303	No		NC_003062.2:504029-505736(+)	7942	0.0576589	1	0.0560281	No
NC_003062.2:1743748-1745152(-)	73633	0.534576	1	0.414082	No		NC_003062.2:485873-489620(-)	17186	0.12477	1	0.1173	No		NC_003062.2:1908995-1909550(-)	153657	1.11555	1	0.672265	No
NC_003063.2:852487-854398(+)	41009	0.297725	2	0.0364321	No		NC_003062.2:1911379-1912111(-)	208913	1.51671	1	0.780567	No		NC_003062.2:1248880-1251298(+)	323715	2.35017	5	0.089724	No
NC_003063.2:1614826-1616326(-)	14305	0.103854	1	0.0986434	No		NC_003062.2:252752-252956(+)	125314	0.90978	2	0.231098	No		NC_003062.2:1463054-1463435(+)	32370	0.235006	1	0.209434	No
NC_003062.2:2244577-2245324(+)	46636	0.338577	2	0.045884	No		NC_003062.2:1909542-1909851(-)	70319	0.510516	2	0.0934097	No		NC_003062.2:1911379-1912111(-)	289350	2.10068	2	0.62056	No
NC_003063.2:931281-932067(-)	86982	0.631489	1	0.468201	No		NC_003062.2:1374513-1376838(+)	577139	4.19003	5	0.408234	No		NC_003062.2:252752-252956(+)	83357	0.605172	1	0.454019	No
NC_003062.2:1713170-1713422(-)	13682	0.0993313	1	0.0945573	No		NC_003063.2:1673664-1675485(-)	131259	0.95294	1	0.614394	No		NC_003062.2:1374513-1376838(+)	599855	4.35495	3	0.809437	No
NC_003062.2:620728-622573(-)	146249	1.06177	1	0.654156	No		NC_003062.2:1086145-1086382(+)	92246	0.669706	1	0.488141	No		NC_003063.2:1673664-1675485(-)	134173	0.974096	2	0.254713	No
NC_003062.2:506473-508687(+)	29253	0.212377	1	0.19134	No		NC_003062.2:2175937-2176435(+)	6385	0.0463551	1	0.0452971	No		NC_003062.2:1086145-1086382(+)	90802	0.659223	1	0.482747	No
NC_003062.2:2486545-2488141(-)	321517	2.33421	3	0.413013	No		NC_003062.2:2207781-2208666(-)	272856	1.98093	5	0.0509493	No		NC_003062.2:2207781-2208666(-)	263422	1.91244	5	0.045099	No
NC_003062.2:717655-718141(+)	79885	0.579965	1	0.440082	No		NC_003062.2:2059741-2061151(-)	7418	0.0538547	1	0.0524302	No		NC_003062.2:2059741-2061151(-)	13422	0.0974437	1	0.0928466	No
NC_003063.2:1542331-1544836(+)	377174	2.73828	1	0.935319	No		NC_003062.2:412451-413651(+)	11939	0.0866771	1	0.0830269	No		NC_003062.2:143593-145597(-)	116855	0.848367	3	0.0546269	No
NC_003063.2:1888597-1888918(+)	48859	0.354716	1	0.298628	No		NC_003062.2:749138-750335(+)	6003	0.0435818	1	0.0426457	No		NC_003062.2:860239-860635(+)	38558	0.279931	2	0.0325822	No
NC_003062.2:188269-189325(-)	45385	0.329495	1	0.280713	No		NC_003063.2:799372-800092(-)	28226	0.204921	1	0.185288	No		NC_003063.2:197715-198777(+)	29285	0.212609	1	0.191528	No
NC_003062.2:2744506-2745193(+)	74233	0.538932	1	0.416629	No		NC_003062.2:882944-883232(-)	13472	0.0978067	1	0.0931758	No		NC_003062.2:117211-117397(+)	64368	0.467312	1	0.373315	No
NC_003062.2:1368004-1368772(+)	217790	1.58116	2	0.46896	No		NC_003062.2:1914599-1915241(-)	201627	1.46381	1	0.768647	No		NC_003063.2:1659104-1660940(-)	16650	0.120879	1	0.113859	No
NC_003063.2:131189-131399(+)	135663	0.984913	4	0.0180771	No		NC_003062.2:1907293-1907656(-)	161697	1.17392	1	0.690847	No		NC_003062.2:2324025-2325564(-)	31718	0.230273	1	0.205683	No
NC_003062.2:2415171-2416074(+)	102457	0.743838	2	0.171178	No		NC_003062.2:1786404-1787559(-)	33867	0.245874	1	0.21798	No		NC_003062.2:2627939-2628719(-)	121943	0.885306	1	0.587412	No
NC_003063.2:1336798-1337029(-)	56460	0.4099	1	0.336283	No		NC_003062.2:1936381-1937557(-)	183623	1.3331	1	0.736342	No		NC_003062.2:2110491-2111370(+)	43465	0.315556	1	0.270617	No
NC_003062.2:2748782-2749274(+)	36795	0.267132	1	0.234428	No		NC_003062.2:2063708-2065178(-)	22515	0.163459	1	0.150799	No		NC_003063.2:1119313-1120234(+)	153142	1.11181	1	0.671037	No
NC_003065.3:197860-199882(+)	10724	0.0778562	1	0.0749026	No		NC_003062.2:822481-822823(-)	316419	2.2972	2	0.6685	No		NC_003062.2:1907293-1907656(-)	149451	1.08501	2	0.29548	No
NC_003062.2:533118-534081(-)	528605	3.83767	7	0.0944551	No		NC_003062.2:783198-784497(-)	43158	0.313327	1	0.268989	No		NC_003062.2:31881-33282(-)	255596	1.85563	3	0.284316	No
NC_003063.2:835768-835945(-)	413631	3.00296	2	0.801294	No		NC_003062.2:1323800-1326734(-)	233651	1.69631	4	0.0926377	No		NC_003062.2:1936381-1937557(-)	233262	1.69348	3	0.241057	No
NC_003062.2:68879-69662(+)	9999	0.0725927	1	0.0700205	No		NC_003062.2:99145-99469(-)	38149	0.276962	1	0.241916	No		NC_003062.2:1323800-1326734(-)	186158	1.35151	1	0.74115	No
NC_003062.2:2788609-2788879(-)	107669	0.781677	1	0.542362	No		NC_003062.2:2208688-2209972(-)	308289	2.23818	1	0.893347	No		NC_003062.2:2208688-2209972(-)	343506	2.49385	3	0.454609	No
NC_003063.2:1011312-1012923(+)	82062	0.59577	1	0.448862	No		NC_003062.2:1082016-1082478(-)	77919	0.565692	1	0.432033	No		NC_003062.2:209584-211141(-)	192368	1.39659	1	0.752561	No
NC_003063.2:1473833-1475315(-)	408182	2.9634	5	0.178625	No		NC_003062.2:1155124-1155583(-)	10772	0.0782047	1	0.0752249	No		NC_003063.2:1197855-1200318(-)	224857	1.63246	1	0.804552	No
NC_003062.2:1160108-1161398(+)	94979	0.689548	1	0.498197	No		NC_003062.2:2778849-2780178(-)	213329	1.54877	3	0.203491	No		NC_003063.2:987991-988285(-)	23050	0.167343	1	0.154091	No
NC_003063.2:372477-373743(+)	672007	4.87877	4	0.717543	No		NC_003063.2:986082-987804(-)	723088	5.24962	4	0.768282	No		NC_003062.2:1684807-1686421(-)	91773	0.666272	2	0.14417	No
NC_003062.2:2592157-2593201(-)	441304	3.20387	1	0.959395	No		NC_003062.2:423108-423690(+)	207656	1.50758	1	0.778555	No		NC_003062.2:568555-568924(+)	16604	0.120545	1	0.113563	No
NC_003062.2:1745245-1745536(+)	31961	0.232037	1	0.207083	No		NC_003062.2:1860026-1860800(+)	240355	1.74498	4	0.100032	No		NC_003063.2:266207-267023(-)	20776	0.150834	1	0.140009	No
NC_003062.2:614536-615565(+)	462956	3.36106	3	0.652689	No		NC_003062.2:1322982-1323687(+)	229826	1.66854	1	0.811477	No		NC_003063.2:1671073-1671868(-)	26227	0.190408	1	0.173378	No
NC_003062.2:2766766-2771524(+)	530718	3.85301	5	0.342473	No		NC_003063.2:1561881-1562943(+)	36876	0.26772	1	0.234878	No		NC_003062.2:1257181-1257784(+)	65067	0.472386	1	0.376487	No
NC_003062.2:158273-159497(-)	52418	0.380555	1	0.316518	No		NC_003062.2:1557056-1557374(-)	19492	0.141512	1	0.131955	No		NC_003062.2:2618189-2619422(-)	202250	1.46833	2	0.431521	No
NC_003062.2:761678-762203(-)	24345	0.176745	1	0.162006	No		NC_003062.2:2048962-2050294(-)	68238	0.495408	1	0.390678	No		NC_003063.2:986082-987804(-)	523516	3.80073	5	0.332298	No
NC_003062.2:1650701-1652180(-)	191335	1.38909	4	0.0525028	No		NC_003062.2:1150419-1151610(-)	160651	1.16633	2	0.325169	No		NC_003063.2:318890-320147(+)	72205	0.524208	1	0.407976	No
NC_003062.2:1694566-1697593(-)	117055	0.849819	1	0.572508	No		NC_003063.2:1656371-1657280(-)	51683	0.375219	2	0.0550336	No		NC_003062.2:2209986-2210565(-)	188037	1.36515	1	0.744657	No
NC_003063.2:1604933-1605170(+)	40952	0.297312	1	0.257187	No		NC_003062.2:163005-164007(+)	66543	0.483102	1	0.383133	No		NC_003062.2:1906386-1906593(-)	81286	0.590136	1	0.445748	No
NC_003062.2:1246265-1246898(+)	189862	1.3784	1	0.748018	No		NC_003063.2:1298942-1301567(+)	78049	0.566636	1	0.432569	No		NC_003062.2:1860026-1860800(+)	183001	1.32859	1	0.735149	No
NC_003062.2:1919404-1919875(-)	56658	0.411337	1	0.337237	No		NC_003062.2:1260797-1262102(+)	167644	1.2171	2	0.343543	No		NC_003062.2:1071017-1071287(-)	18299	0.132851	1	0.124404	No
NC_003062.2:2056027-2057443(-)	30882	0.224203	1	0.200847	No		NC_003062.2:1001892-1003398(-)	75989	0.55168	1	0.424019	No		NC_003062.2:1322982-1323687(+)	182993	1.32853	3	0.149507	No
NC_003062.2:607140-608841(+)	180634	1.3114	1	0.730558	No		NC_003062.2:327687-328251(-)	68205	0.495168	1	0.390532	No		NC_003062.2:145673-146672(-)	58921	0.427766	1	0.348036	No
NC_003062.2:676327-677962(-)	3337025	24.2268	28	0.246957	No		NC_003062.2:2006741-2007050(-)	100165	0.727198	1	0.516739	No		NC_003062.2:1008215-1009433(+)	4637	0.0336646	1	0.0331043	No
NC_003062.2:1501562-1502084(-)	57151	0.414916	1	0.339604	No		NC_003062.2:2643816-2644350(-)	40463	0.293761	1	0.254546	No		NC_003062.2:1559627-1560809(+)	30915	0.224443	1	0.201039	No
NC_003062.2:588759-590199(-)	52404	0.380453	2	0.056389	No		NC_003062.2:2032765-2032993(-)	65248	0.4737	1	0.377306	No		NC_003062.2:1521638-1522139(-)	78041	0.566578	1	0.432536	No
NC_003062.2:2600469-2600949(+)	50200	0.364452	2	0.0522828	No		NC_003062.2:88749-91491(-)	100703	0.731104	1	0.518623	No		NC_003062.2:1150419-1151610(-)	141824	1.02964	1	0.642865	No
NC_003062.2:352674-353817(+)	85319	0.619416	1	0.461741	No		NC_003062.2:1258210-1259401(+)	82749	0.600758	1	0.451604	No		NC_003063.2:1908229-1909303(-)	130146	0.94486	1	0.611266	No
NC_003062.2:2055065-2056031(-)	70450	0.511467	1	0.400385	No		NC_003062.2:1792061-1792367(+)	17627	0.127972	1	0.120122	No		NC_003062.2:1816063-1817575(+)	27193	0.197421	1	0.179155	No
NC_003062.2:1369131-1370058(+)	69669	0.505797	1	0.396975	No		NC_003063.2:840701-841241(+)	20660	0.149992	1	0.139285	No		NC_003062.2:678037-678334(-)	227126	1.64893	2	0.49073	No
NC_003062.2:717012-717654(+)	125292	0.90962	2	0.23104	No		NC_003062.2:1457834-1460699(-)	375448	2.72575	5	0.140948	No		NC_003062.2:1259677-1260787(+)	140996	1.02363	2	0.272934	No
NC_003062.2:514900-515656(+)	21586	0.156714	1	0.145052	No		NC_003063.2:1479995-1480472(+)	533203	3.87105	2	0.898505	No		NC_003062.2:1525123-1525987(-)	441840	3.20776	6	0.106294	No
NC_003062.2:2173921-2174137(+)	198930	1.44423	3	0.17729	No		NC_003062.2:2637428-2638874(+)	63726	0.462651	1	0.370388	No		NC_003062.2:317546-319109(+)	66020	0.479305	1	0.380787	No
NC_003064.2:129200-130916(-)	117485	0.852941	2	0.210351	No		NC_003062.2:1721994-1723365(-)	175157	1.27164	1	0.719629	No		NC_003062.2:163005-164007(+)	75129	0.545437	1	0.420411	No
NC_003062.2:2110491-2111370(+)	24357	0.176832	1	0.162079	No		NC_003063.2:1471563-1472388(-)	20355	0.147777	1	0.137377	No		NC_003062.2:129977-130970(+)	148443	1.0777	2	0.292796	No
NC_003063.2:1119313-1120234(+)	233040	1.69187	2	0.504226	No		NC_003062.2:1257780-1258209(+)	22049	0.160076	1	0.147921	No		NC_003063.2:788424-789270(-)	8758	0.0635831	1	0.0616038	No
NC_003063.2:348934-349285(+)	22163	0.160903	1	0.148626	No		NC_003063.2:1610741-1611602(-)	78743	0.571674	2	0.112665	No		NC_003063.2:220090-222085(+)	304	0.00220704	1	0.00220461	No
NC_003062.2:1150419-1151610(-)	176965	1.28477	1	0.723285	No		NC_003062.2:1562467-1563406(+)	339331	2.46354	4	0.23466	No		NC_003062.2:1262251-1264333(+)	242212	1.75846	1	0.82769	No
NC_003062.2:1525123-1525987(-)	510881	3.709	8	0.0356613	No		NC_003063.2:1012919-1014650(+)	284479	2.06532	2	0.611385	No		NC_003062.2:1912110-1912500(-)	174070	1.26375	2	0.360281	No
NC_003062.2:1912110-1912500(-)	186758	1.35586	3	0.15594	No		NC_003062.2:2047118-2048870(-)	309276	2.24534	5	0.077491	No		NC_003062.2:2193589-2195107(-)	1342223	9.74454	14	0.117631	No
NC_003062.2:2668228-2670922(-)	227547	1.65199	1	0.808332	No		NC_003062.2:323821-324283(-)	101462	0.736614	1	0.521268	No		NC_003062.2:596389-597487(+)	170445	1.23743	1	0.709871	No
NC_003062.2:1860026-1860800(+)	189539	1.37605	3	0.160745	No		NC_003063.2:1542331-1544836(+)	355964	2.5843	3	0.477622	No		NC_003062.2:1903629-1904220(-)	88135	0.63986	1	0.472634	No
NC_003062.2:1913676-1913970(-)	62072	0.450643	1	0.362782	No		NC_003062.2:2067545-2068571(-)	23312	0.169245	1	0.155698	No		NC_003062.2:2032765-2032993(-)	63803	0.46321	1	0.370739	No
NC_003062.2:2139351-2139804(-)	13290	0.0964854	1	0.0919768	No		NC_003062.2:1246265-1246898(+)	119972	0.870997	4	0.0120741	No		NC_003062.2:2096348-2096690(-)	45830	0.332726	1	0.283033	No
NC_003063.2:1610741-1611602(-)	56660	0.411352	1	0.337246	No		NC_003062.2:324365-324938(-)	385698	2.80017	2	0.76895	No		NC_003063.2:1573836-1575474(+)	359346	2.60885	1	0.926381	No
NC_003062.2:585139-585838(-)	39179	0.28444	2	0.0335416	No		NC_003063.2:1191283-1192912(-)	183138	1.32958	1	0.735412	No		NC_003062.2:1919952-1920324(-)	85866	0.623387	1	0.463875	No
NC_003062.2:2111660-2112767(+)	175644	1.27518	1	0.720618	No		NC_003062.2:1013941-1015039(+)	2697947	19.5871	15	0.878126	No		NC_003063.2:1146286-1147750(-)	138030	1.0021	1	0.632891	No
NC_003063.2:560686-560989(-)	29239	0.212275	1	0.191258	No		NC_003062.2:1113391-1113814(+)	23766	0.172541	1	0.158476	No		NC_003063.2:840701-841241(+)	18927	0.13741	1	0.128387	No
NC_003062.2:1569891-1570140(+)	41507	0.301341	1	0.260174	No		NC_003062.2:2622647-2623550(-)	377009	2.73709	2	0.757991	No		NC_003062.2:2660737-2661331(-)	61693	0.447891	1	0.361026	No
NC_003063.2:814087-814465(-)	19661	0.142739	1	0.13302	No		NC_003062.2:272421-272817(+)	170296	1.23635	4	0.0370081	No		NC_003062.2:1457834-1460699(-)	315309	2.28914	1	0.898647	No
NC_003062.2:2765655-2766225(-)	129089	0.937186	1	0.608271	No		NC_003063.2:990074-991145(-)	140294	1.01853	2	0.271059	No		NC_003063.2:1479995-1480472(+)	506736	3.6789	6	0.166909	No
NC_003062.2:726172-727417(+)	332328	2.4127	2	0.694314	No		NC_003062.2:1553544-1554741(+)	94083	0.683043	1	0.494922	No		NC_003062.2:1721994-1723365(-)	172851	1.2549	2	0.357118	No
NC_003062.2:792051-792285(-)	114591	0.831931	2	0.202729	No		NC_003063.2:194586-195906(+)	136951	0.994264	1	0.630004	No		NC_003063.2:1211489-1213067(+)	70868	0.514502	1	0.402202	No
NC_003062.2:1358342-1360853(+)	375623	2.72702	3	0.512972	No		NC_003062.2:2647212-2649273(-)	1568	0.0113837	1	0.0113191	No		NC_003062.2:1257780-1258209(+)	21225	0.154093	2	0.0107204	No
NC_003062.2:252140-252563(+)	171946	1.24833	1	0.713016	No		NC_003062.2:3906-4389(-)	21342	0.154943	1	0.143536	No		NC_003063.2:267058-267778(-)	10612	0.0770431	2	0.0028197	No
NC_003062.2:1717323-1721142(+)	327045	2.37435	1	0.906925	No		NC_003063.2:992267-993791(-)	161021	1.16901	2	0.326145	No		NC_003063.2:1192916-1194359(-)	69041	0.501238	2	0.0905796	No
NC_003062.2:2003143-2004067(-)	33708	0.24472	1	0.217076	No		NC_003062.2:2658726-2659230(-)	79446	0.576778	1	0.438295	No		NC_003062.2:1562467-1563406(+)	278280	2.02031	1	0.867386	No
NC_003063.2:1906314-1908117(-)	74345	0.539745	1	0.417103	No		NC_003063.2:1906314-1908117(-)	158479	1.15056	2	0.319434	No		NC_003062.2:142568-142961(-)	45945	0.333561	1	0.283632	No
NC_003062.2:1927197-1931334(-)	211002	1.53187	3	0.199196	No		NC_003062.2:2606194-2607073(-)	142857	1.03714	2	0.277902	No		NC_003063.2:1012919-1014650(+)	268995	1.9529	1	0.858138	No
NC_003062.2:2617706-2618120(-)	33138	0.240582	2	0.0246914	No		NC_003062.2:935236-936337(-)	460650	3.34432	4	0.429432	No		NC_003062.2:2047118-2048870(-)	361908	2.62745	3	0.48844	No
NC_003062.2:66550-67573(+)	180887	1.31324	1	0.731053	No		NC_003062.2:1080043-1080619(-)	53821	0.39074	1	0.323444	No		NC_003062.2:2111660-2112767(+)	316842	2.30027	1	0.899769	No
NC_003062.2:958503-958758(+)	28574	0.207447	1	0.187344	No		NC_003062.2:2104071-2105460(-)	143191	1.03957	1	0.646392	No		NC_003062.2:1246265-1246898(+)	134820	0.978793	1	0.624236	No
NC_003062.2:2624794-2625757(-)	245285	1.78077	1	0.831492	No		NC_003062.2:1743748-1745152(-)	39841	0.289246	1	0.251172	No		NC_003062.2:324365-324938(-)	487607	3.54003	2	0.868282	No
NC_003063.2:1460755-1464235(-)	52956	0.384461	1	0.319182	No		NC_003062.2:290154-291135(-)	111075	0.806404	1	0.55354	No		NC_003062.2:857954-858305(+)	5891	0.0427687	1	0.041867	No
NC_003063.2:1143449-1144370(-)	367298	2.66658	8	0.00616734	No		NC_003062.2:726172-727417(+)	299310	2.17299	2	0.638797	No		NC_003063.2:1191283-1192912(-)	187014	1.35772	1	0.742754	No
NC_003063.2:200555-201242(-)	549761	3.99126	5	0.369457	No		NC_003062.2:2193589-2195107(-)	1695240	12.3074	3	0.999598	No		NC_003062.2:1013941-1015039(+)	2450840	17.7931	18	0.511883	No
NC_003063.2:1572730-1573786(+)	51557	0.374304	1	0.312232	No		NC_003062.2:560237-561716(+)	95750	0.695145	1	0.500998	No		NC_003062.2:2622647-2623550(-)	427536	3.10391	7	0.0390218	No
NC_003062.2:398431-400057(-)	120111	0.872006	1	0.581888	No		NC_003062.2:763516-765226(+)	66555	0.483189	1	0.383187	No		NC_003062.2:2134532-2136587(-)	138362	1.00451	1	0.633775	No
NC_003062.2:2628734-2630576(-)	238511	1.73159	1	0.822997	No		NC_003062.2:561719-562823(+)	107512	0.780537	1	0.54184	No		NC_003063.2:1145348-1146290(-)	80776	0.586434	2	0.117455	No
NC_003062.2:1932034-1932553(-)	366906	2.66374	3	0.497451	No		NC_003063.2:588114-588672(-)	94472	0.685867	1	0.496346	No		NC_003062.2:272421-272817(+)	201881	1.46566	6	0.00399017	No
NC_003062.2:2325654-2326719(-)	384380	2.7906	3	0.528302	No		NC_003062.2:1901223-1902234(-)	186892	1.35684	1	0.742526	No		NC_003062.2:1569891-1570140(+)	31821	0.23102	2	0.0229105	No
NC_003062.2:1423771-1424692(+)	104279	0.757066	1	0.530959	No		NC_003063.2:1182127-1183381(+)	36502	0.265005	1	0.232798	No		NC_003063.2:990074-991145(-)	127779	0.927676	2	0.237658	No
NC_003062.2:86871-87141(-)	190820	1.38535	3	0.162974	No		NC_003062.2:252140-252563(+)	167568	1.21654	1	0.703748	No		NC_003063.2:992267-993791(-)	124118	0.901097	1	0.593876	No
NC_003062.2:80359-80899(+)	12789	0.0928481	1	0.0886681	No		NC_003062.2:1717323-1721142(+)	438895	3.18638	5	0.216966	No		NC_003062.2:2604174-2604585(-)	80329	0.583189	1	0.441884	No
NC_003063.2:842760-844524(-)	73289	0.532078	2	0.100083	No		NC_003062.2:1025052-1025238(+)	31394	0.22792	2	0.022345	No		NC_003062.2:252140-252563(+)	152683	1.10848	1	0.669939	No
NC_003063.2:523970-524444(+)	99016	0.718856	2	0.162385	No		NC_003063.2:1475408-1475918(-)	216063	1.56862	1	0.791667	No		NC_003062.2:935236-936337(-)	349148	2.53481	5	0.113522	No
NC_003062.2:1947932-1948475(+)	29527	0.214366	1	0.192947	No		NC_003063.2:1475983-1477039(-)	80842	0.586913	1	0.443959	No		NC_003062.2:859965-860151(-)	12572	0.0912727	1	0.0872313	No
NC_003062.2:316510-316777(+)	49824	0.361722	2	0.0515934	No		NC_003062.2:1906604-1907174(-)	102069	0.741021	2	0.170182	No		NC_003062.2:2104071-2105460(-)	181632	1.31865	3	0.147203	No
NC_003062.2:2607104-2608634(-)	366909	2.66376	2	0.744688	No		NC_003063.2:1559542-1560730(-)	228879	1.66166	2	0.494755	No		NC_003062.2:2765655-2766225(-)	117816	0.855344	2	0.211225	No
NC_003062.2:511606-511990(+)	10524	0.0764042	1	0.0735584	No		NC_003062.2:62606-62725(+)	20382	0.147973	1	0.137546	No		NC_003063.2:790999-792946(-)	205559	1.49236	1	0.775158	No
NC_003062.2:1940052-1940502(-)	84588	0.614109	1	0.458877	No		NC_003062.2:1184746-1184830(-)	263844	1.91551	1	0.852733	No		NC_003062.2:1258210-1259401(+)	93012	0.675267	1	0.49098	No
NC_003063.2:795619-796153(-)	151806	1.10211	1	0.667831	No		NC_003062.2:2073551-2073888(-)	4401590	31.9555	23	0.958724	No		NC_003062.2:1916028-1917204(-)	140343	1.01889	2	0.27119	No
NC_003062.2:1922807-1927016(-)	736458	5.34669	4	0.780314	No		NC_003062.2:62963-63040(+)	38415	0.278893	1	0.243379	No		NC_003062.2:290154-291135(-)	86124	0.62526	1	0.464878	No
NC_003062.2:2604716-2606171(-)	405989	2.94748	3	0.564941	No		NC_003062.2:2513394-2515651(-)	227102	1.64876	4	0.0856763	No		NC_003062.2:1370944-1371502(+)	66970	0.486202	2	0.0860489	No
NC_003062.2:1357978-1358332(+)	27049	0.196376	1	0.178297	No		NC_003062.2:1255707-1255784(+)	91773	0.666272	1	0.48638	No		NC_003062.2:726172-727417(+)	350818	2.54694	2	0.7222	No
NC_003062.2:2402895-2403171(+)	71425	0.518545	1	0.404614	No		NC_003063.2:1044790-1047047(+)	227157	1.64916	1	0.807789	No		NC_003062.2:1453985-1454798(+)	21643	0.157128	1	0.145405	No
NC_003063.2:1505683-1506706(+)	21219	0.15405	1	0.142771	No		NC_003063.2:1221109-1221185(-)	266550	1.93515	2	0.576158	No		NC_003062.2:560237-561716(+)	94953	0.689359	1	0.498102	No
NC_003062.2:792336-793092(-)	11307	0.0820888	1	0.0788099	No		NC_003063.2:1307205-1309440(+)	226679	1.64569	1	0.80712	No		NC_003063.2:989205-990072(-)	44489	0.32299	2	0.0421803	No
NC_003062.2:252996-253401(+)	209613	1.52179	2	0.449441	No		NC_003062.2:2007230-2007563(+)	2359261	17.1282	18	0.448322	No		NC_003062.2:1358342-1360853(+)	221901	1.611	2	0.478615	No
NC_003062.2:1912796-1913633(-)	420234	3.0509	4	0.36417	No		NC_003062.2:59718-61975(+)	212724	1.54438	2	0.456916	No		NC_003063.2:902787-904071(-)	37325	0.270979	1	0.237368	No
NC_003062.2:755158-756274(-)	21996	0.159691	1	0.147593	No		NC_003063.2:1310429-1310506(+)	39188	0.284505	1	0.247613	No		NC_003062.2:905300-905729(+)	79397	0.576422	1	0.438095	No
NC_003063.2:525704-527306(+)	18614	0.135138	1	0.126404	No									NC_003062.2:1717323-1721142(+)	376932	2.73653	1	0.935205	No
NC_003062.2:539916-540705(-)	51073	0.37079	1	0.309811	No									NC_003062.2:1653757-1653901(+)	136858	0.993589	1	0.629755	No
NC_003063.2:1033661-1035335(-)	105550	0.766293	1	0.535267	No									NC_003063.2:1475408-1475918(-)	203834	1.47983	5	0.0176427	No
NC_003062.2:2630583-2630964(-)	17242	0.125177	1	0.117659	No									NC_003063.2:1195648-1197856(-)	155034	1.12555	1	0.675525	No
NC_003063.2:361095-361776(-)	126125	0.915667	1	0.599751	No									NC_003063.2:1559542-1560730(-)	216512	1.57188	2	0.465937	No
NC_003062.2:1905890-1906370(-)	131759	0.95657	4	0.0164401	No									NC_003063.2:1048035-1048112(+)	30182	0.219121	1	0.196776	No
NC_003062.2:716705-716933(+)	133192	0.966974	3	0.074328	No									NC_003062.2:1184746-1184830(-)	44261	0.321335	1	0.27482	No
NC_003062.2:232852-233041(+)	31935	0.231848	1	0.206933	No									NC_003062.2:2073551-2073888(-)	3929975	28.5316	16	0.995843	No
NC_003062.2:1931597-1931975(-)	203615	1.47824	4	0.0629417	No									NC_003062.2:2513394-2515651(-)	205083	1.4889	1	0.77438	No
NC_003062.2:1709940-1710612(-)	18254	0.132524	1	0.124118	No									NC_003062.2:1255707-1255784(+)	115014	0.835002	1	0.566126	No
NC_003062.2:1120602-1121259(+)	953456	6.92209	11	0.093083	No									NC_003062.2:1255589-1255666(+)	263813	1.91528	1	0.8527	No
NC_003062.2:2619475-2622472(-)	746382	5.41873	4	0.78892	No									NC_003062.2:2007230-2007563(+)	1517989	11.0206	6	0.962939	No
NC_003063.2:1286218-1286665(-)	87186	0.63297	3	0.0264975	No									NC_003062.2:59718-61975(+)	204956	1.48798	1	0.774172	No
NC_003062.2:707904-709128(+)	55678	0.404222	1	0.332504	No
NC_003062.2:856748-857471(+)	19913	0.144568	1	0.134604	No
NC_003063.2:1831051-1831294(-)	58189	0.422452	1	0.344562	No
NC_003062.2:2660737-2661331(-)	101938	0.74007	2	0.169846	No
NC_003062.2:1908995-1909550(-)	139495	1.01273	1	0.636775	No
NC_003064.2:70031-71549(-)	18202	0.132147	1	0.123787	No
NC_003062.2:963362-965354(+)	18907	0.137265	1	0.128261	No
NC_003063.2:1147852-1148869(-)	687884	4.99404	10	0.0316124	No
NC_003062.2:1914599-1915241(-)	178818	1.29822	1	0.726982	No
NC_003062.2:1323800-1326734(-)	225959	1.64046	1	0.80611	No
NC_003063.2:1183802-1184117(+)	8667	0.0629224	1	0.0609837	No
NC_003062.2:1155124-1155583(-)	23879	0.173362	1	0.159166	No
NC_003062.2:1684807-1686421(-)	100793	0.731757	3	0.0381188	No
NC_003062.2:1756760-1757090(+)	77761	0.564545	2	0.11037	No
NC_003062.2:1697659-1699417(-)	27537	0.199919	1	0.181203	No
NC_003062.2:423108-423690(+)	217267	1.57736	1	0.79348	No
NC_003062.2:1559627-1560809(+)	49025	0.355922	1	0.299472	No
NC_003063.2:1908229-1909303(-)	100903	0.732556	2	0.167197	No
NC_003063.2:374777-375611(+)	130429	0.946915	1	0.612064	No
NC_003062.2:2622647-2623550(-)	415278	3.01492	2	0.803069	No
NC_003062.2:1260797-1262102(+)	228172	1.65653	2	0.493134	No
NC_003063.2:1182127-1183381(+)	45426	0.329793	1	0.280927	No
NC_003062.2:2032765-2032993(-)	68432	0.496816	1	0.391535	No
NC_003063.2:1899904-1902694(+)	84264	0.611757	1	0.457603	No
NC_003063.2:1012919-1014650(+)	281394	2.04292	5	0.0566085	No
NC_003063.2:1577488-1578325(+)	6161	0.0447289	1	0.0437433	No
NC_003062.2:323821-324283(-)	147500	1.07085	2	0.290284	No
NC_003063.2:1144404-1145352(-)	138547	1.00585	1	0.634267	No
NC_003063.2:1191283-1192912(-)	222987	1.61889	3	0.221533	No
NC_003062.2:2445960-2446209(+)	65109	0.472691	1	0.376678	No
NC_003062.2:1013941-1015039(+)	3054099	22.1728	25	0.301214	No
NC_003062.2:2134532-2136587(-)	143079	1.03875	1	0.646104	No
NC_003062.2:1210952-1211990(-)	87102	0.632361	1	0.468664	No
NC_003062.2:2243070-2243652(-)	210345	1.5271	2	0.451205	No
NC_003062.2:1233945-1234878(-)	13464	0.0977486	1	0.0931232	No
NC_003062.2:1901223-1902234(-)	194627	1.41299	2	0.412644	No
NC_003062.2:1025052-1025238(+)	39151	0.284236	1	0.247411	No
NC_003063.2:1559542-1560730(-)	165799	1.2037	4	0.0340909	No
NC_003062.2:2073551-2073888(-)	4688484	34.0384	21	0.993363	No
NC_003062.2:2513394-2515651(-)	323323	2.34732	3	0.416471	No
NC_003062.2:1255707-1255784(+)	186168	1.35158	2	0.391338	No
NC_003062.2:1255589-1255666(+)	672060	4.87916	2	0.955298	No
NC_003063.2:1307205-1309440(+)	279986	2.0327	6	0.0177728	No
NC_003062.2:2007230-2007563(+)	2354119	17.0909	25	0.042744	No
NC_003062.2:1956772-1956846(-)	11852	0.0860455	2	0.00349626	No
NC_003062.2:59718-61975(+)	323183	2.34631	3	0.416203	No

## Sheet: Table 4. Hotspot_B. subtilis 
Biological replicate 1							Biological replicate 2							Biological replicate 2
				p-value after Bonferroni correction:	0.00015674						p-value after Bonferroni correction:	0.000154799						p-value after Bonferroni correction:	0.000220264		The number of hotspot genes supported by at least two replicates: 4
Gene_ID	Coverage	Expected number of transcription errors	Observed number of transcription errors	Poisson cumulative probability of >= observed mutations in the gene	Significant		Gene_ID	Coverage	Expected number of transcription errors	Observed number of transcription errors	Poisson cumulative probability of >= observed mutations in the gene	Significant		Gene_ID	Coverage	Expected number of transcription errors	Observed number of transcription errors	Poisson cumulative probability of >= observed mutations in the gene	Significant
NZ_CM000488.1:951879-951951(+)	55264	0.320531	7	5.21354e-08	Yes		NZ_CM000488.1:3171888-3171965(-)	45554	0.264213	6	3.76943e-07	Yes		NZ_CM000488.1:528511-528586(+)	66145	0.383641	17	0	Yes
NZ_CM000488.1:194518-194593(+)	55840	0.323872	6	1.21535e-06	Yes		NZ_CM000488.1:966367-966441(+)	186653	1.08259	10	2.28709e-07	Yes		NZ_CM000488.1:634711-634785(+)	100170	0.580986	6	3.25496e-05	Yes
NZ_CM000488.1:166498-168053(+)	78248	0.453838	9	1.49738e-09	Yes		NZ_CM000488.1:3172421-3172508(-)	29636	0.171889	5	1.08387e-06	Yes		NZ_CM000488.1:1153058-1155743(+)	197944	1.14808	2	0.31853	No
NZ_CM000488.1:634711-634785(+)	78292	0.454094	7	5.316e-07	Yes		NZ_CM000488.1:951879-951951(+)	96375	0.558975	17	0	Yes		NZ_CM000488.1:330301-331927(+)	1757392	10.1929	15	0.0938912	No
NZ_CM000488.1:1153058-1155743(+)	359928	2.08758	2	0.617181	No		NZ_CM000488.1:194518-194593(+)	98314	0.570221	12	1.45861e-12	Yes		NZ_CM000488.1:2616654-2617650(-)	95257	0.552491	1	0.424485	No
NZ_CM000488.1:120602-120974(+)	179523	1.04123	1	0.646981	No		NZ_CM000488.1:3171617-3171694(-)	4968	0.0288144	4	2.80686e-08	Yes		NZ_CM000488.1:4030782-4031229(-)	330689	1.918	1	0.853099	No
NZ_CM000488.1:3492517-3493957(-)	438343	2.54239	3	0.467013	No		NZ_CM000488.1:634711-634785(+)	186885	1.08393	10	2.31287e-07	Yes		NZ_CM000488.1:2951269-2951629(-)	138935	0.805823	1	0.55328	No
NZ_CM000488.1:330301-331927(+)	2066610	11.9863	9	0.844075	No		NZ_CM000488.1:528511-528586(+)	99916	0.579513	28	0	Yes		NZ_CM000488.1:4140702-4141593(-)	132840	0.770472	1	0.537205	No
NZ_CM000488.1:3633984-3634899(-)	1625615	9.42857	10	0.468871	No		NZ_CM000488.1:1153058-1155743(+)	1745175	10.122	11	0.432222	No		NZ_CM000488.1:2914405-2915383(-)	198782	1.15294	2	0.3203	No
NZ_CM000488.1:1086519-1087452(+)	233905	1.35665	2	0.39311	No		NZ_CM000488.1:120602-120974(+)	216588	1.25621	2	0.357587	No		NZ_CM000488.1:195397-196024(+)	264842	1.53608	1	0.784778	No
NZ_CM000488.1:1247062-1247839(+)	140656	0.815805	1	0.557717	No		NZ_CM000488.1:3492517-3493957(-)	472811	2.7423	2	0.758914	No		NZ_CM000488.1:518182-518464(+)	92423	0.536053	1	0.414947	No
NZ_CM000488.1:4197594-4197834(-)	280977	1.62967	1	0.804005	No		NZ_CM000488.1:1981741-1989424(-)	368156	2.1353	4	0.16808	No		NZ_CM000488.1:1769698-1770742(+)	100979	0.585678	1	0.443272	No
NZ_CM000488.1:885522-885981(-)	13099	0.0759742	1	0.0731599	No		NZ_CM000488.1:330301-331927(+)	2265285	13.1387	10	0.843153	No		NZ_CM000488.1:143871-144051(+)	72184	0.418667	2	0.0666261	No
NZ_CM000488.1:4030782-4031229(-)	605739	3.51329	1	0.970201	No		NZ_CM000488.1:3426800-3427286(+)	11093	0.0643394	1	0.0623133	No		NZ_CM000488.1:194820-195384(+)	355517	2.062	2	0.610515	No
NZ_CM000488.1:2977745-2978684(-)	418228	2.42572	1	0.911586	No		NZ_CM000488.1:1086519-1087452(+)	132055	0.765919	2	0.179013	No		NZ_CM000488.1:139920-140121(+)	121222	0.703088	1	0.504946	No
NZ_CM000488.1:6992-9458(+)	106269	0.61636	1	0.460094	No		NZ_CM000488.1:1247062-1247839(+)	160783	0.932541	1	0.606448	No		NZ_CM000488.1:157418-158477(+)	106962	0.62038	2	0.128657	No
NZ_CM000488.1:4140702-4141593(-)	375312	2.17681	2	0.639741	No		NZ_CM000488.1:2616654-2617650(-)	232170	1.34659	3	0.153747	No		NZ_CM000488.1:3835316-3836663(+)	1682935	9.76102	13	0.186351	No
NZ_CM000488.1:2914405-2915383(-)	287892	1.66977	3	0.23482	No		NZ_CM000488.1:4030782-4031229(-)	318864	1.84941	2	0.551703	No		NZ_CM000488.1:647451-648216(+)	315789	1.83158	3	0.277849	No
NZ_CM000488.1:143871-144051(+)	84897	0.492403	2	0.0879088	No		NZ_CM000488.1:2977745-2978684(-)	531758	3.0842	1	0.954233	No		NZ_CM000488.1:1001042-1001621(+)	2349	0.0136242	1	0.0135318	No
NZ_CM000488.1:2340610-2343355(+)	46953	0.272327	1	0.238395	No		NZ_CM000488.1:2951269-2951629(-)	177607	1.03012	1	0.643036	No		NZ_CM000488.1:138493-138835(+)	182241	1.057	1	0.652502	No
NZ_CM000488.1:1315141-1316278(+)	2010324	11.6599	7	0.944738	No		NZ_CM000488.1:4140702-4141593(-)	566417	3.28522	4	0.416394	No		NZ_CM000488.1:1733268-1735419(+)	159003	0.922217	1	0.602364	No
NZ_CM000488.1:194820-195384(+)	296193	1.71792	2	0.512299	No		NZ_CM000488.1:3252539-3254849(-)	5863	0.0340054	1	0.0334337	No		NZ_CM000488.1:1563331-1563664(+)	244318	1.41704	2	0.414037	No
NZ_CM000488.1:1654863-1655052(-)	76849	0.445724	1	0.35964	No		NZ_CM000488.1:2914405-2915383(-)	209228	1.21352	2	0.342255	No		NZ_CM000488.1:2319521-2321027(-)	1650	0.00957	1	0.00952435	No
NZ_CM000488.1:2969934-2970528(-)	15734	0.0912572	1	0.0872171	No		NZ_CM000488.1:1690931-1691384(+)	26924	0.156159	1	0.144577	No		NZ_CM000488.1:2099759-2101247(+)	948689	5.5024	5	0.642855	No
NZ_CM000488.1:3835051-3835183(+)	4419522	25.6332	28	0.345669	No		NZ_CM000488.1:143871-144051(+)	140771	0.816472	1	0.558012	No		NZ_CM000488.1:138838-139495(+)	257416	1.49301	1	0.775305	No
NZ_CM000488.1:157418-158477(+)	155167	0.899969	2	0.227506	No		NZ_CM000488.1:1580863-1581217(+)	40899	0.237214	1	0.211178	No		NZ_CM000488.1:135708-136338(+)	432343	2.50759	2	0.714256	No
NZ_CM000488.1:1691760-1693371(+)	347389	2.01486	2	0.598	No		NZ_CM000488.1:1315141-1316278(+)	1322481	7.67039	8	0.500165	No		NZ_CM000488.1:1037924-1038032(+)	66880	0.387904	2	0.0583384	No
NZ_CM000488.1:2854717-2855026(-)	398090	2.30892	4	0.202469	No		NZ_CM000488.1:3914309-3916259(-)	678893	3.93758	4	0.554241	No		NZ_CM000488.1:2264390-2264837(-)	13978	0.0810724	1	0.0778731	No
NZ_CM000488.1:3123269-3124661(-)	3603	0.0208974	1	0.0206806	No		NZ_CM000488.1:194820-195384(+)	388970	2.25603	1	0.895234	No		NZ_CM000488.1:3913681-3914296(-)	198027	1.14856	1	0.682906	No
NZ_CM000488.1:3835316-3836663(+)	3256245	18.8862	18	0.611759	No		NZ_CM000488.1:1654863-1655052(-)	57158	0.331516	1	0.282166	No		NZ_CM000488.1:2148251-2149205(+)	8276	0.0480008	1	0.046867	No
NZ_CM000488.1:647451-648216(+)	410453	2.38063	8	0.00318163	No		NZ_CM000488.1:1691760-1693371(+)	96881	0.56191	1	0.429881	No		NZ_CM000488.1:1298346-1299525(+)	317849	1.84352	3	0.28106	No
NZ_CM000488.1:1094331-1095372(+)	44675	0.259115	2	0.0282978	No		NZ_CM000488.1:2854717-2855026(-)	310602	1.80149	2	0.537607	No		NZ_CM000488.1:2635012-2635279(+)	313376	1.81758	1	0.837582	No
NZ_CM000488.1:138493-138835(+)	274136	1.58999	3	0.214058	No		NZ_CM000488.1:57742-58696(+)	49812	0.28891	1	0.25092	No		NZ_CM000488.1:2983800-2985558(-)	99954	0.579733	1	0.439952	No
NZ_CM000488.1:1595736-1597059(+)	509379	2.9544	4	0.342553	No		NZ_CM000488.1:1223808-1224726(+)	231129	1.34055	1	0.738298	No		NZ_CM000488.1:130681-132760(+)	828023	4.80253	3	0.857701	No
NZ_CM000488.1:1693383-1694400(+)	157459	0.913262	1	0.598787	No		NZ_CM000488.1:2663130-2663610(-)	187310	1.0864	3	0.0968598	No		NZ_CM000488.1:2384710-2384989(-)	145375	0.843175	2	0.206804	No
NZ_CM000488.1:2501822-2502917(-)	51337	0.297755	1	0.257516	No		NZ_CM000488.1:3835316-3836663(+)	1721746	9.98613	10	0.540333	No		NZ_CM000488.1:3275129-3275423(-)	909460	5.27487	7	0.279011	No
NZ_CM000488.1:329304-330270(+)	2878144	16.6932	13	0.848821	No		NZ_CM000488.1:647451-648216(+)	190822	1.10677	1	0.669374	No		NZ_CM000488.1:2598728-2599091(-)	60514	0.350981	2	0.0489133	No
NZ_CM000488.1:2099759-2101247(+)	1586377	9.20099	12	0.216915	No		NZ_CM000488.1:2189126-2189951(-)	125405	0.727349	1	0.516812	No		NZ_CM000488.1:3367835-3369011(-)	114022	0.661328	1	0.483834	No
NZ_CM000488.1:138838-139495(+)	346978	2.01247	1	0.866342	No		NZ_CM000488.1:1094331-1095372(+)	53752	0.311762	1	0.267844	No		NZ_CM000488.1:2001813-2002359(+)	247118	1.43328	2	0.419603	No
NZ_CM000488.1:135708-136338(+)	726259	4.2123	5	0.412564	No		NZ_CM000488.1:1595736-1597059(+)	336856	1.95376	1	0.858261	No		NZ_CM000488.1:1769172-1769433(+)	72903	0.422837	1	0.344815	No
NZ_CM000488.1:3913681-3914296(-)	347739	2.01689	3	0.327894	No		NZ_CM000488.1:1563331-1563664(+)	231637	1.34349	2	0.388507	No		NZ_CM000488.1:3807505-3808363(-)	178940	1.03785	1	0.645785	No
NZ_CM000488.1:2871919-2873212(-)	120841	0.700878	2	0.15611	No		NZ_CM000488.1:1718035-1718917(+)	315912	1.83229	4	0.113952	No		NZ_CM000488.1:1385295-1386255(-)	42748	0.247938	1	0.219592	No
NZ_CM000488.1:1298346-1299525(+)	496609	2.88033	5	0.165046	No		NZ_CM000488.1:1222730-1223807(+)	199553	1.15741	3	0.11141	No		NZ_CM000488.1:937200-937455(+)	78243	0.453809	2	0.0765348	No
NZ_CM000488.1:2635012-2635279(+)	382399	2.21791	3	0.382086	No		NZ_CM000488.1:329304-330270(+)	2694803	15.6299	7	0.994903	No		NZ_CM000488.1:1316267-1316402(+)	229787	1.33276	4	0.0464351	No
NZ_CM000488.1:2983800-2985558(-)	212174	1.23061	2	0.348407	No		NZ_CM000488.1:2099759-2101247(+)	1761136	10.2146	12	0.327873	No		NZ_CM000488.1:1533388-1533508(+)	163104	0.946003	1	0.61171	No
NZ_CM000488.1:3976777-3978184(-)	92396	0.535897	1	0.414856	No		NZ_CM000488.1:1877590-1878925(+)	160472	0.930738	2	0.238782	No		NZ_CM000488.1:3837545-3838856(+)	256632	1.48847	2	0.438307	No
NZ_CM000488.1:130681-132760(+)	1150362	6.6721	3	0.962116	No		NZ_CM000488.1:138838-139495(+)	515661	2.99083	7	0.0330486	No		NZ_CM000488.1:1522386-1524054(-)	138539	0.803526	1	0.552253	No
NZ_CM000488.1:2384710-2384989(-)	243631	1.41306	2	0.412668	No		NZ_CM000488.1:135708-136338(+)	733190	4.2525	5	0.420367	No		NZ_CM000488.1:3464774-3465386(+)	164946	0.956687	1	0.615836	No
NZ_CM000488.1:3275129-3275423(-)	1124029	6.51937	4	0.889476	No		NZ_CM000488.1:141191-141731(+)	438270	2.54197	1	0.921288	No		NZ_CM000488.1:2268686-2268857(-)	4496457	26.0795	25	0.610013	No
NZ_CM000488.1:3837545-3838856(+)	416601	2.41629	2	0.695088	No		NZ_CM000488.1:4042559-4044218(+)	54238	0.31458	1	0.269905	No		NZ_CM000488.1:810870-811317(+)	36813	0.213515	1	0.19226	No
NZ_CM000488.1:2418343-2419972(-)	125890	0.730162	2	0.166354	No		NZ_CM000488.1:1363422-1365072(+)	23441	0.135958	1	0.127121	No		NZ_CM000488.1:4197877-4198396(-)	277415	1.60901	2	0.477974	No
NZ_CM000488.1:4118518-4120048(+)	480851	2.78894	1	0.938513	No		NZ_CM000488.1:3988934-3989954(-)	63379	0.367598	1	0.307605	No		NZ_CM000488.1:145873-146527(+)	528155	3.0633	1	0.953267	No
NZ_CM000488.1:69165-69543(+)	40610	0.235538	1	0.209854	No		NZ_CM000488.1:1974057-1981725(-)	785095	4.55355	6	0.306244	No		NZ_CM000488.1:3836833-3837553(+)	856800	4.96944	7	0.233362	No
NZ_CM000488.1:2598728-2599091(-)	91034	0.527997	1	0.410215	No		NZ_CM000488.1:1298346-1299525(+)	421874	2.44687	1	0.913436	No		NZ_CM000488.1:3437063-3437732(-)	143644	0.833135	1	0.565316	No
NZ_CM000488.1:2498252-2499245(-)	141128	0.818542	1	0.558926	No		NZ_CM000488.1:1963221-1974033(-)	1351007	7.83584	1	0.999605	No		NZ_ABQL01000011.1:0-834(+)	241032	1.39799	1	0.752906	No
NZ_CM000488.1:3367835-3369011(-)	250350	1.45203	1	0.765905	No		NZ_CM000488.1:2635012-2635279(+)	462826	2.68439	5	0.134778	No		NZ_CM000488.1:2916997-2917582(-)	121376	0.703981	3	0.0346277	No
NZ_CM000488.1:1699445-1700240(+)	170610	0.989538	1	0.628252	No		NZ_CM000488.1:2983800-2985558(-)	207856	1.20556	1	0.700477	No		NZ_CM000488.1:3034743-3035346(+)	300801	1.74465	1	0.825293	No
NZ_CM000488.1:2001813-2002359(+)	333734	1.93566	4	0.131457	No		NZ_CM000488.1:3976777-3978184(-)	73261	0.424914	1	0.346174	No		NZ_CM000488.1:387279-398038(+)	2600837	15.0849	11	0.885602	No
NZ_CM000488.1:1769172-1769433(+)	137409	0.796972	1	0.549308	No		NZ_CM000488.1:130681-132760(+)	1689925	9.80157	14	0.121502	No		NZ_CM000488.1:137307-138141(+)	388309	2.25219	2	0.657972	No
NZ_CM000488.1:732218-735416(+)	74713	0.433335	1	0.351657	No		NZ_CM000488.1:2384710-2384989(-)	288196	1.67154	3	0.235283	No		NZ_CM000488.1:2965425-2965806(-)	192693	1.11762	4	0.0270627	No
NZ_CM000488.1:937200-937455(+)	40113	0.232655	1	0.207573	No		NZ_CM000488.1:3275129-3275423(-)	1444033	8.37539	8	0.598102	No		NZ_CM000488.1:3265697-3268928(-)	256901	1.49003	1	0.774633	No
NZ_CM000488.1:1316267-1316402(+)	222340	1.28957	1	0.724611	No		NZ_CM000488.1:2563232-2563613(-)	81979	0.475478	2	0.0828608	No		NZ_CM000488.1:120056-120557(+)	284392	1.64947	3	0.229502	No
NZ_CM000488.1:1181717-1182302(-)	70313	0.407815	1	0.334898	No		NZ_CM000488.1:4118518-4120048(+)	569681	3.30415	4	0.420578	No		NZ_CM000488.1:3808543-3808918(-)	19711	0.114324	1	0.108031	No
NZ_CM000488.1:3830505-3831222(-)	79921	0.463542	1	0.370948	No		NZ_CM000488.1:2001813-2002359(+)	313475	1.81816	3	0.274245	No		NZ_CM000488.1:649745-651380(+)	103646	0.601147	1	0.451817	No
NZ_CM000488.1:1152534-1152891(+)	13897	0.0806026	1	0.0774398	No		NZ_CM000488.1:3918083-3919625(-)	152725	0.885805	1	0.587618	No		NZ_CM000488.1:398074-401899(+)	860793	4.9926	9	0.0676116	No
NZ_CM000488.1:4198436-4198724(-)	302050	1.75189	3	0.256533	No		NZ_CM000488.1:1769172-1769433(+)	80274	0.465589	2	0.0799542	No		NZ_CM000488.1:3835051-3835183(+)	5934850	34.4221	44	0.0651204	No
NZ_CM000488.1:3464774-3465386(+)	88887	0.515545	1	0.402825	No		NZ_CM000488.1:3807505-3808363(-)	245237	1.42237	2	0.415867	No		NZ_CM000488.1:146523-147270(+)	238025	1.38055	3	0.161821	No
NZ_CM000488.1:2268686-2268857(-)	6206793	35.9994	33	0.713875	No		NZ_CM000488.1:2916206-2916983(-)	94414	0.547601	1	0.421665	No		NZ_CM000488.1:1679695-1680853(+)	150694	0.874025	1	0.582731	No
NZ_CM000488.1:4074768-4075803(-)	12327	0.0714966	1	0.0690006	No		NZ_CM000488.1:937200-937455(+)	20722	0.120188	1	0.113246	No		NZ_CM000488.1:1902687-1903440(-)	286570	1.66211	2	0.494895	No
NZ_CM000488.1:3972350-3974078(-)	226627	1.31444	1	0.731374	No		NZ_CM000488.1:1316267-1316402(+)	184400	1.06952	1	0.656827	No		NZ_CM000488.1:3780484-3781906(-)	868852	5.03934	5	0.566383	No
NZ_CM000488.1:4197877-4198396(-)	410611	2.38154	3	0.425462	No		NZ_CM000488.1:1181717-1182302(-)	181985	1.05551	1	0.651986	No		NZ_CM000488.1:2363078-2363753(-)	245852	1.42594	1	0.759718	No
NZ_CM000488.1:1738200-1738470(+)	218636	1.26809	2	0.36183	No		NZ_CM000488.1:1152534-1152891(+)	4130	0.023954	1	0.0236694	No		NZ_CM000488.1:3568289-3568547(-)	11153	0.0646874	1	0.0626396	No
NZ_CM000488.1:1941890-1943159(-)	51181	0.29685	1	0.256844	No		NZ_CM000488.1:1420699-1421197(+)	10087	0.0585046	1	0.0568261	No		NZ_CM000488.1:3865603-3866353(+)	124701	0.723266	1	0.514835	No
NZ_CM000488.1:145873-146527(+)	821796	4.76642	4	0.700644	No		NZ_CM000488.1:3633984-3634899(-)	670072	3.88642	6	0.197379	No		NZ_CM000488.1:3633984-3634899(-)	465505	2.69993	3	0.506358	No
NZ_CM000488.1:2599419-2600535(-)	387403	2.24694	2	0.656726	No		NZ_CM000488.1:3464774-3465386(+)	359611	2.08574	2	0.616705	No		NZ_CM000488.1:1598543-1602845(+)	976914	5.6661	6	0.499316	No
NZ_CM000488.1:3836833-3837553(+)	1332634	7.72928	4	0.949181	No		NZ_CM000488.1:3295408-3296911(-)	11398	0.0661084	1	0.0639706	No		NZ_CM000488.1:1315141-1316278(+)	1934426	11.2197	12	0.446938	No
NZ_CM000488.1:2401234-2402515(-)	194113	1.12586	1	0.675625	No		NZ_CM000488.1:2268686-2268857(-)	4697615	27.2462	24	0.758747	No		NZ_CM000488.1:3480696-3481704(-)	127718	0.740764	1	0.523251	No
NZ_CM000488.1:3437063-3437732(-)	215451	1.24962	3	0.131446	No		NZ_CM000488.1:1551680-1551962(+)	14845	0.086101	1	0.0824984	No		NZ_CM000488.1:3128549-3130133(+)	536136	3.10959	2	0.816633	No
NZ_ABQL01000011.1:0-834(+)	314016	1.82129	2	0.543469	No		NZ_CM000488.1:143357-143858(+)	483271	2.80297	2	0.769427	No		NZ_CM000488.1:2362276-2363044(-)	458606	2.65991	5	0.131185	No
NZ_CM000488.1:3135956-3136394(-)	162344	0.941595	2	0.242768	No		NZ_CM000488.1:4197877-4198396(-)	471967	2.73741	1	0.935262	No		NZ_CM000488.1:714735-715731(+)	295126	1.71173	1	0.819447	No
NZ_CM000488.1:387279-398038(+)	3511312	20.3656	15	0.908539	No		NZ_CM000488.1:1522386-1524054(-)	162942	0.945064	2	0.244042	No		NZ_CM000488.1:3916286-3917243(-)	207015	1.20069	1	0.699013	No
NZ_CM000488.1:2608955-2609099(-)	12339	0.0715662	1	0.0690654	No		NZ_CM000488.1:130157-130628(+)	212268	1.23115	1	0.708045	No		NZ_CM000488.1:4101416-4102649(-)	198668	1.15227	1	0.684083	No
NZ_CM000488.1:1531138-1532551(+)	476616	2.76437	2	0.762786	No		NZ_CM000488.1:1738200-1738470(+)	397145	2.30344	4	0.201353	No		NZ_CM000488.1:3823799-3825263(-)	117208	0.679806	1	0.493285	No
NZ_CM000488.1:3724595-3726404(-)	46274	0.268389	1	0.23539	No		NZ_CM000488.1:724289-725300(+)	179850	1.04313	4	0.0217474	No		NZ_CM000488.1:1563690-1564584(+)	197558	1.14584	1	0.682042	No
NZ_CM000488.1:137307-138141(+)	638491	3.70325	1	0.975357	No		NZ_CM000488.1:1941890-1943159(-)	77492	0.449454	1	0.362023	No		NZ_CM000488.1:2917686-2919369(-)	166680	0.966744	1	0.619681	No
NZ_CM000488.1:2965425-2965806(-)	273023	1.58353	8	0.000243218	No		NZ_CM000488.1:145873-146527(+)	956896	5.55	1	0.996113	No		NZ_CM000488.1:4126489-4126639(-)	28248	0.163838	1	0.151121	No
NZ_CM000488.1:2616210-2616630(-)	79860	0.463188	1	0.370726	No		NZ_CM000488.1:3836833-3837553(+)	746117	4.32748	5	0.434868	No		NZ_CM000488.1:3643604-3644294(-)	86710	0.502918	1	0.395237	No
NZ_CM000488.1:2517231-2518035(-)	58890	0.341562	1	0.289341	No		NZ_CM000488.1:2401234-2402515(-)	198167	1.14937	1	0.683163	No		NZ_CM000488.1:140143-140407(+)	236712	1.37293	1	0.746636	No
NZ_CM000488.1:3822551-3823223(-)	162443	0.942169	1	0.610219	No		NZ_CM000488.1:3796078-3797149(-)	14386	0.0834388	1	0.0800526	No		NZ_CM000488.1:2563844-2564090(+)	22183	0.128661	1	0.120728	No
NZ_CM000488.1:3265697-3268928(-)	276755	1.60518	2	0.47674	No		NZ_ABQL01000011.1:0-834(+)	185618	1.07658	2	0.292388	No		NZ_CM000488.1:1670430-1670916(-)	67977	0.394267	1	0.325826	No
NZ_CM000488.1:2380521-2380971(-)	290198	1.68315	1	0.814212	No		NZ_CM000488.1:3135956-3136394(-)	190752	1.10636	2	0.303299	No		NZ_CM000488.1:2826098-2828312(-)	80534	0.467097	1	0.373181	No
NZ_CM000488.1:120056-120557(+)	359950	2.08771	2	0.617214	No		NZ_CM000488.1:139496-139931(+)	370653	2.14979	2	0.633022	No		NZ_CM000488.1:3366036-3367821(-)	139755	0.810579	1	0.555399	No
NZ_CM000488.1:649745-651380(+)	353692	2.05141	2	0.607731	No		NZ_CM000488.1:2916997-2917582(-)	82493	0.478459	1	0.380263	No		NZ_CM000488.1:1226213-1226792(+)	84545	0.490361	1	0.387595	No
NZ_CM000488.1:398074-401899(+)	1318213	7.64564	8	0.496582	No		NZ_CM000488.1:387279-398038(+)	2725862	15.81	12	0.863301	No		NZ_CM000488.1:3782871-3784380(-)	1029934	5.97362	7	0.38946	No
NZ_CM000488.1:4022529-4029534(-)	320258	1.8575	3	0.28482	No		NZ_CM000488.1:76981-78895(+)	258039	1.49663	1	0.776116	No		NZ_CM000488.1:1545389-1547228(+)	65454	0.379633	1	0.315888	No
NZ_CM000488.1:3637242-3638766(-)	49915	0.289507	1	0.251367	No		NZ_CM000488.1:344084-344996(+)	255440	1.48155	1	0.772715	No		NZ_CM000488.1:677423-678464(-)	684196	3.96834	9	0.0204357	No
NZ_CM000488.1:146523-147270(+)	437061	2.53495	3	0.465121	No		NZ_CM000488.1:1531138-1532551(+)	745144	4.32184	10	0.013321	No		NZ_CM000488.1:2831622-2831889(-)	42171	0.244592	2	0.0254546	No
NZ_CM000488.1:1679695-1680853(+)	300985	1.74571	1	0.825479	No		NZ_CM000488.1:3186512-3187058(+)	752719	4.36577	3	0.810752	No		NZ_CM000488.1:3844994-3846140(+)	8083	0.0468814	1	0.0457994	No
NZ_CM000488.1:1902687-1903440(-)	452487	2.62442	2	0.737296	No		NZ_CM000488.1:137307-138141(+)	786844	4.5637	6	0.307987	No		NZ_CM000488.1:135360-135669(+)	183945	1.06688	1	0.65592	No
NZ_CM000488.1:2363078-2363753(-)	358287	2.07806	2	0.614712	No		NZ_CM000488.1:2965425-2965806(-)	152885	0.886733	2	0.222667	No		NZ_CM000488.1:118587-119013(+)	294107	1.70582	1	0.818377	No
NZ_CM000488.1:3205178-3207164(-)	91371	0.529952	1	0.411367	No		NZ_CM000488.1:2951660-2951861(-)	73116	0.424073	2	0.0681206	No		NZ_CM000488.1:2995992-2996295(+)	102691	0.595608	1	0.448773	No
NZ_CM000488.1:1999025-2000003(-)	74153	0.430087	1	0.349548	No		NZ_CM000488.1:3265697-3268928(-)	599886	3.47934	2	0.861912	No		NZ_CM000488.1:1675306-1675654(+)	120412	0.69839	1	0.502614	No
NZ_CM000488.1:3865603-3866353(+)	206668	1.19867	1	0.698406	No		NZ_CM000488.1:2380521-2380971(-)	359703	2.08628	2	0.616844	No		NZ_CM000488.1:401927-402656(+)	141336	0.819749	1	0.559458	No
NZ_CM000488.1:1118118-1118388(+)	104840	0.608072	1	0.455601	No		NZ_CM000488.1:120056-120557(+)	477601	2.77009	3	0.523385	No		NZ_CM000488.1:345012-346560(+)	154737	0.897475	2	0.226594	No
NZ_CM000488.1:1598543-1602845(+)	663791	3.84999	4	0.536688	No		NZ_CM000488.1:649745-651380(+)	244719	1.41937	1	0.758134	No		NZ_CM000488.1:69623-70010(+)	33193	0.192519	2	0.0163166	No
NZ_CM000488.1:1397769-1398234(+)	211985	1.22951	1	0.707565	No		NZ_CM000488.1:398074-401899(+)	983587	5.7048	7	0.346399	No		NZ_CM000488.1:3444440-3445076(-)	3675	0.021315	1	0.0210894	No
NZ_CM000488.1:3480696-3481704(-)	134008	0.777246	1	0.54033	No		NZ_CM000488.1:1679695-1680853(+)	451464	2.61849	1	0.927087	No		NZ_CM000488.1:3836675-3836837(+)	84682	0.491156	3	0.013726	No
NZ_CM000488.1:3128549-3130133(+)	780244	4.52542	4	0.661974	No		NZ_CM000488.1:1902687-1903440(-)	251522	1.45883	2	0.428301	No		NZ_CM000488.1:2915418-2916192(-)	128219	0.74367	1	0.524634	No
NZ_CM000488.1:147581-147800(+)	159099	0.922774	1	0.602585	No		NZ_CM000488.1:2996313-2997633(-)	23284	0.135047	1	0.126325	No		NZ_CM000488.1:1250547-1250865(-)	36095	0.209351	1	0.18889	No
NZ_CM000488.1:2362276-2363044(-)	615763	3.57143	4	0.478698	No		NZ_CM000488.1:2363078-2363753(-)	439381	2.54841	1	0.921794	No		NZ_CM000488.1:2307071-2307272(+)	120959	0.701562	1	0.50419	No
NZ_CM000488.1:714735-715731(+)	494895	2.87039	5	0.163449	No		NZ_CM000488.1:3479195-3480380(-)	184535	1.0703	2	0.290084	No		NZ_CM000488.1:1939801-1941301(+)	93797	0.544023	1	0.419591	No
NZ_CM000488.1:2393831-2394980(-)	175081	1.01547	2	0.269932	No		NZ_CM000488.1:346650-348105(+)	138975	0.806055	2	0.193386	No		NZ_CM000488.1:1595736-1597059(+)	222152	1.28848	1	0.724311	No
NZ_CM000488.1:3573360-3574782(-)	82047	0.475873	1	0.378657	No		NZ_CM000488.1:1598543-1602845(+)	1429885	8.29333	3	0.989071	No		NZ_CM000488.1:1560837-1562706(+)	1219458	7.07286	5	0.833552	No
NZ_CM000488.1:4101416-4102649(-)	244949	1.4207	3	0.171528	No		NZ_CM000488.1:3913305-3913680(-)	392770	2.27807	1	0.897518	No		NZ_CM000488.1:376499-387267(+)	1674039	9.70943	6	0.921091	No
NZ_CM000488.1:1697541-1699005(+)	68778	0.398912	1	0.328951	No		NZ_CM000488.1:3480696-3481704(-)	161293	0.935499	2	0.24053	No		NZ_CM000488.1:2747183-2748017(-)	1571765	9.11624	6	0.891188	No
NZ_CM000488.1:3823799-3825263(-)	206575	1.19814	3	0.120109	No		NZ_CM000488.1:3128549-3130133(+)	679834	3.94304	3	0.753431	No		NZ_CM000488.1:1597094-1598243(+)	581136	3.37059	6	0.125767	No
NZ_CM000488.1:1563690-1564584(+)	277695	1.61063	3	0.219392	No		NZ_CM000488.1:147581-147800(+)	208515	1.20939	1	0.70162	No		NZ_CM000488.1:327146-329128(+)	383024	2.22154	1	0.891558	No
NZ_CM000488.1:1997516-1998992(-)	163394	0.947685	1	0.612363	No		NZ_CM000488.1:2362276-2363044(-)	639930	3.71159	2	0.884856	No		NZ_CM000488.1:2564922-2565096(+)	141998	0.823588	3	0.050874	No
NZ_CM000488.1:3591454-3592393(-)	19669	0.11408	1	0.107814	No		NZ_CM000488.1:714735-715731(+)	337975	1.96026	2	0.583129	No		NZ_CM000488.1:3784938-3785451(-)	359959	2.08776	3	0.347063	No
NZ_CM000488.1:2541252-2541648(+)	36518	0.211804	1	0.190877	No		NZ_CM000488.1:2393831-2394980(-)	287601	1.66809	1	0.811392	No		NZ_CM000488.1:2738685-2739393(+)	320850	1.86093	3	0.285744	No
NZ_CM000488.1:3918083-3919625(-)	137877	0.799687	2	0.191095	No		NZ_CM000488.1:2580976-2583127(-)	56652	0.328582	1	0.280056	No		NZ_CM000488.1:148927-149872(+)	400403	2.32234	2	0.674264	No
NZ_CM000488.1:3664626-3665505(+)	84736	0.491469	1	0.388273	No		NZ_CM000488.1:3823799-3825263(-)	90169	0.52298	1	0.407249	No		NZ_CM000488.1:1208455-1209697(+)	27193	0.157719	1	0.145911	No
NZ_CM000488.1:3643604-3644294(-)	183044	1.06166	2	0.286909	No		NZ_CM000488.1:1563690-1564584(+)	257847	1.49551	1	0.775866	No		NZ_CM000488.1:2003853-2005617(+)	50665	0.293857	1	0.254617	No
NZ_CM000488.1:3914309-3916259(-)	949025	5.50435	5	0.643159	No		NZ_CM000488.1:1473826-1474291(-)	10424	0.0604592	1	0.0586678	No		NZ_CM000488.1:2484840-2485956(-)	77705	0.450689	1	0.362811	No
NZ_CM000488.1:140143-140407(+)	340405	1.97435	6	0.0156556	No		NZ_CM000488.1:3664626-3665505(+)	137284	0.796247	1	0.548982	No		NZ_CM000488.1:510631-512167(+)	109114	0.632861	1	0.46893	No
NZ_CM000488.1:3040405-3041569(+)	28569	0.1657	1	0.1527	No		NZ_CM000488.1:3643604-3644294(-)	106494	0.617665	1	0.460798	No		NZ_CM000488.1:1269007-1269355(-)	255132	1.47977	2	0.43538	No
NZ_CM000488.1:1139076-1142775(+)	20879	0.121098	1	0.114053	No		NZ_CM000488.1:140143-140407(+)	336017	1.9489	2	0.579986	No		NZ_CM000488.1:2978727-2979999(-)	320116	1.85667	2	0.553812	No
NZ_CM000488.1:647271-647445(+)	108193	0.627519	1	0.466085	No		NZ_CM000488.1:2609246-2610152(-)	146353	0.848847	1	0.572092	No		NZ_CM000488.1:2600733-2602545(-)	347539	2.01573	2	0.598234	No
NZ_CM000488.1:153839-154277(+)	101268	0.587354	1	0.444204	No		NZ_CM000488.1:3545231-3545825(+)	105504	0.611923	2	0.125843	No		NZ_CM000488.1:2658414-2659542(+)	16453	0.0954274	1	0.0910156	No
NZ_CM000488.1:3366036-3367821(-)	343474	1.99215	2	0.591865	No		NZ_CM000488.1:4084595-4085528(+)	35397	0.205303	2	0.0184005	No		NZ_CM000488.1:3493983-3494700(-)	53418	0.309824	1	0.266424	No
NZ_CM000488.1:1517133-1517412(+)	7775	0.045095	1	0.0440933	No		NZ_CM000488.1:2873241-2874216(-)	27919	0.16193	1	0.149499	No		NZ_CM000488.1:58780-59395(+)	96218	0.558064	1	0.427684	No
NZ_CM000488.1:1545389-1547228(+)	94321	0.547062	2	0.104797	No		NZ_CM000488.1:1517133-1517412(+)	9298	0.0539284	1	0.0525001	No		NZ_CM000488.1:3354589-3355987(-)	72245	0.419021	1	0.34231	No
NZ_CM000488.1:677423-678464(-)	1180039	6.84423	5	0.812318	No		NZ_CM000488.1:253489-254734(-)	26102	0.151392	1	0.140489	No		NZ_CM000488.1:2659531-2659666(+)	84395	0.489491	3	0.0136035	No
NZ_CM000488.1:2617671-2618985(-)	71474	0.414549	1	0.339362	No		NZ_CM000488.1:121914-125496(+)	997415	5.78501	9	0.131376	No		NZ_CM000488.1:1680881-1681784(+)	247035	1.4328	2	0.419438	No
NZ_CM000488.1:1989448-1997134(-)	178635	1.03608	1	0.645158	No		NZ_CM000488.1:677423-678464(-)	900709	5.22411	9	0.0837101	No		NZ_CM000488.1:329304-330270(+)	2570401	14.9083	13	0.724723	No
NZ_CM000488.1:118587-119013(+)	530590	3.07742	4	0.370108	No		NZ_CM000488.1:2032103-2032802(-)	113620	0.658996	1	0.482629	No		NZ_CM000488.1:3806747-3807386(-)	96516	0.559793	1	0.428673	No
NZ_CM000488.1:149949-150312(+)	191448	1.1104	1	0.670572	No		NZ_CM000488.1:2885354-2886629(-)	376085	2.18129	1	0.887105	No		NZ_CM000488.1:2909963-2910095(-)	16133	0.0935714	1	0.089327	No
NZ_CM000488.1:4010827-4011556(-)	57954	0.336133	1	0.285472	No		NZ_CM000488.1:56349-57720(+)	13725	0.079605	1	0.076519	No		NZ_CM000488.1:132879-134070(+)	1244905	7.22045	13	0.0332781	No
NZ_CM000488.1:2348030-2348516(-)	34044	0.197455	1	0.179183	No		NZ_CM000488.1:4045488-4046448(+)	70601	0.409486	1	0.336008	No		NZ_CM000488.1:1664601-1664835(+)	121561	0.705054	1	0.505918	No
NZ_CM000488.1:1675306-1675654(+)	156541	0.907938	1	0.596645	No		NZ_CM000488.1:135360-135669(+)	275316	1.59683	2	0.474045	No		NZ_CM000488.1:3627307-3629833(-)	156425	0.907265	2	0.230177	No
NZ_CM000488.1:401927-402656(+)	189708	1.10031	1	0.667231	No		NZ_CM000488.1:118587-119013(+)	480929	2.78939	1	0.938541	No		NZ_CM000488.1:141191-141731(+)	217721	1.26278	2	0.359936	No
NZ_CM000488.1:345012-346560(+)	216969	1.25842	1	0.715898	No		NZ_CM000488.1:2345390-2346683(-)	99187	0.575285	1	0.437455	No		NZ_CM000488.1:312925-313504(+)	34117	0.197879	1	0.179531	No
NZ_CM000488.1:125557-129157(+)	1031844	5.9847	10	0.0828745	No		NZ_CM000488.1:149949-150312(+)	287881	1.66971	2	0.497289	No		NZ_CM000488.1:2966044-2967067(-)	1403179	8.13844	6	0.821119	No
NZ_CM000488.1:4134790-4136017(-)	59604	0.345703	2	0.0476156	No		NZ_CM000488.1:3913681-3914296(-)	253854	1.47235	1	0.770615	No		NZ_CM000488.1:3877958-3879506(-)	503544	2.92056	1	0.946096	No
NZ_CM000488.1:3836675-3836837(+)	110116	0.638673	1	0.472007	No		NZ_CM000488.1:1675306-1675654(+)	217983	1.2643	2	0.360479	No		NZ_CM000488.1:2608151-2608919(-)	73079	0.423858	1	0.345483	No
NZ_CM000488.1:2484840-2485956(-)	141142	0.818624	3	0.0501377	No		NZ_CM000488.1:401927-402656(+)	158333	0.918331	1	0.600815	No		NZ_CM000488.1:1694517-1695144(+)	20336	0.117949	1	0.111258	No
NZ_CM000488.1:448000-448573(-)	27264	0.158131	1	0.146262	No		NZ_CM000488.1:345012-346560(+)	1069130	6.20095	8	0.284119	No		NZ_CM000488.1:147969-148335(+)	332657	1.92941	1	0.854766	No
NZ_CM000488.1:2075384-2077805(+)	184992	1.07295	1	0.658003	No		NZ_CM000488.1:2625308-2627144(-)	196374	1.13897	1	0.679851	No		NZ_CM000488.1:52760-53021(+)	352663	2.04545	1	0.870677	No
NZ_CM000488.1:3955480-3956239(+)	4763	0.0276254	1	0.0272473	No		NZ_CM000488.1:3978739-3980092(+)	21089	0.122316	1	0.115131	No		NZ_CM000488.1:3569543-3570497(-)	9748	0.0565384	1	0.0549698	No
NZ_CM000488.1:3624738-3625077(-)	67630	0.392254	1	0.324467	No		NZ_CM000488.1:2484840-2485956(-)	128741	0.746698	2	0.172189	No		NZ_CM000488.1:2107953-2110779(-)	617499	3.58149	3	0.693963	No
NZ_CM000488.1:2915418-2916192(-)	215437	1.24953	1	0.713362	No		NZ_CM000488.1:1557302-1558223(-)	53630	0.311054	1	0.267326	No		NZ_CM000488.1:887442-888666(-)	7797	0.0452226	1	0.0442153	No
NZ_CM000488.1:2307071-2307272(+)	158502	0.919312	2	0.234591	No		NZ_CM000488.1:3835139-3835292(+)	52897	0.306803	1	0.264204	No		NZ_CM000488.1:3825252-3828939(-)	239419	1.38863	3	0.163761	No
NZ_CM000488.1:1939801-1941301(+)	369753	2.14457	2	0.631712	No		NZ_CM000488.1:313554-314328(+)	46186	0.267879	2	0.0300721	No		NZ_CM000488.1:1833572-1850039(+)	5432	0.0315056	1	0.0310145	No
NZ_CM000488.1:522387-523176(+)	68506	0.397335	1	0.327891	No		NZ_CM000488.1:140853-141165(+)	235219	1.36427	1	0.744433	No		NZ_CM000488.1:140447-140816(+)	198656	1.1522	2	0.320034	No
NZ_CM000488.1:1733268-1735419(+)	268624	1.55802	1	0.789447	No		NZ_CM000488.1:2307071-2307272(+)	149049	0.864484	3	0.057137	No		NZ_CM000488.1:2951873-2952395(-)	314237	1.82257	1	0.838391	No
NZ_CM000488.1:3675156-3677397(-)	6136	0.0355888	1	0.034963	No		NZ_CM000488.1:522387-523176(+)	240616	1.39557	3	0.165433	No		NZ_CM000488.1:2363754-2364258(-)	139036	0.806409	1	0.553541	No
NZ_CM000488.1:1560837-1562706(+)	1554115	9.01387	6	0.885149	No		NZ_CM000488.1:1733268-1735419(+)	312687	1.81358	3	0.273019	No		NZ_CM000488.1:1772080-1773610(+)	311225	1.80511	1	0.835543	No
NZ_CM000488.1:213909-214077(+)	7906	0.0458548	1	0.0448194	No		NZ_CM000488.1:1560837-1562706(+)	1597038	9.26282	7	0.816122	No		NZ_CM000488.1:2994920-2995862(-)	297097	1.72316	2	0.513913	No
NZ_CM000488.1:376499-387267(+)	2277284	13.2082	15	0.346286	No		NZ_CM000488.1:4141666-4143070(-)	502350	2.91363	3	0.557184	No		NZ_CM000488.1:2442590-2443358(-)	60061	0.348354	1	0.294151	No
NZ_CM000488.1:429502-429625(+)	117690	0.682602	3	0.0320591	No		NZ_CM000488.1:376499-387267(+)	1705556	9.89222	12	0.291034	No		NZ_CM000488.1:2584639-2585248(-)	173746	1.00773	2	0.267084	No
NZ_CM000488.1:1430759-1432280(-)	15704	0.0910832	1	0.0870582	No		NZ_CM000488.1:55863-56157(+)	267453	1.55123	2	0.459171	No		NZ_CM000488.1:2414579-2416349(-)	210498	1.22089	2	0.344909	No
NZ_CM000488.1:55863-56157(+)	354252	2.05466	2	0.608587	No		NZ_CM000488.1:1850053-1857685(+)	758789	4.40098	9	0.0358447	No		NZ_CM000488.1:3601585-3602803(-)	504358	2.92528	5	0.172341	No
NZ_CM000488.1:1850053-1857685(+)	249170	1.44519	1	0.764298	No		NZ_CM000488.1:1597094-1598243(+)	761805	4.41847	5	0.452354	No		NZ_CM000488.1:3781931-3782795(-)	554562	3.21646	3	0.623521	No
NZ_CM000488.1:1597094-1598243(+)	926176	5.37182	10	0.0473984	No		NZ_CM000488.1:327146-329128(+)	466254	2.70427	2	0.752114	No		NZ_CM000488.1:2106684-2107938(-)	517228	2.99992	7	0.0335046	No
NZ_CM000488.1:327146-329128(+)	546649	3.17056	4	0.390922	No		NZ_CM000488.1:2564922-2565096(+)	151005	0.875829	3	0.0589361	No		NZ_CM000488.1:129699-130116(+)	182626	1.05923	1	0.653278	No
NZ_CM000488.1:2796299-2796581(-)	20798	0.120628	1	0.113637	No		NZ_CM000488.1:1989448-1997134(-)	385385	2.23523	2	0.653936	No		NZ_CM000488.1:45630-47625(+)	5253	0.0304674	1	0.0300079	No
NZ_CM000488.1:3784938-3785451(-)	524173	3.0402	3	0.585757	No		NZ_CM000488.1:2414579-2416349(-)	396570	2.30011	1	0.899752	No		NZ_CM000488.1:3602818-3603565(-)	181446	1.05239	1	0.650896	No
NZ_CM000488.1:3258413-3259886(-)	57568	0.333894	2	0.044759	No		NZ_CM000488.1:1230358-1232371(+)	62414	0.362001	1	0.303718	No		NZ_CM000488.1:3491795-3492518(-)	293639	1.70311	2	0.507719	No
NZ_CM000488.1:1671438-1672779(+)	442286	2.56526	3	0.472814	No		NZ_CM000488.1:3409464-3410622(+)	136979	0.794478	4	0.00886974	No		NZ_CM000488.1:2053776-2054418(-)	309842	1.79708	1	0.834218	No
NZ_CM000488.1:3832643-3834314(-)	37637	0.218295	1	0.196111	No		NZ_CM000488.1:3784938-3785451(-)	420270	2.43757	1	0.912627	No		NZ_CM000488.1:3388020-3389409(-)	66075	0.383235	1	0.318347	No
NZ_CM000488.1:2738685-2739393(+)	371318	2.15364	1	0.88394	No		NZ_CM000488.1:2417148-2418324(-)	199936	1.15963	2	0.322735	No		NZ_CM000488.1:715733-716048(+)	117500	0.6815	1	0.494142	No
NZ_CM000488.1:1763885-1764929(+)	79704	0.462283	1	0.370156	No		NZ_CM000488.1:1671438-1672779(+)	403662	2.34124	4	0.209089	No		NZ_CM000488.1:154297-154690(+)	83032	0.481586	1	0.382197	No
NZ_CM000488.1:148927-149872(+)	561851	3.25874	6	0.112213	No		NZ_CM000488.1:2738685-2739393(+)	487760	2.82901	5	0.156869	No		NZ_CM000488.1:3914309-3916259(-)	493499	2.86229	2	0.779318	No
NZ_CM000488.1:1963221-1974033(-)	399178	2.31523	1	0.901257	No		NZ_CM000488.1:3443327-3444404(+)	29336	0.170149	1	0.156461	No		NZ_CM000488.1:2854079-2854364(-)	251897	1.461	1	0.767996	No
NZ_CM000488.1:3781931-3782795(-)	932454	5.40823	6	0.45529	No		NZ_CM000488.1:148927-149872(+)	665416	3.85941	3	0.740565	No		NZ_CM000488.1:200245-202048(+)	426086	2.4713	3	0.448804	No
NZ_CM000488.1:2003853-2005617(+)	188332	1.09233	2	0.29816	No		NZ_CM000488.1:1208455-1209697(+)	121819	0.70655	1	0.506657	No		NZ_CM000488.1:142970-143333(+)	132619	0.76919	1	0.536612	No
NZ_CM000488.1:1269007-1269355(-)	168403	0.976737	2	0.255684	No		NZ_CM000488.1:3781931-3782795(-)	842547	4.88677	4	0.718719	No		NZ_CM000488.1:2977745-2978684(-)	292014	1.69368	1	0.816158	No
NZ_CM000488.1:148355-148751(+)	160166	0.928963	1	0.605037	No		NZ_CM000488.1:2003853-2005617(+)	178178	1.03343	1	0.644216	No		NZ_CM000488.1:2980163-2981282(-)	446816	2.59153	2	0.730976	No
NZ_CM000488.1:2295147-2295768(-)	13638	0.0791004	1	0.0760528	No		NZ_CM000488.1:3369021-3371469(-)	22327	0.129497	1	0.121462	No		NZ_CM000488.1:136988-137276(+)	254377	1.47539	2	0.433903	No
NZ_CM000488.1:1695140-1696456(+)	203549	1.18058	4	0.0321093	No		NZ_CM000488.1:1673156-1673402(+)	54903	0.318437	1	0.272715	No		NZ_CM000488.1:3277315-3278452(+)	552926	3.20697	2	0.829706	No
NZ_CM000488.1:2978727-2979999(-)	513730	2.97963	1	0.949189	No		NZ_CM000488.1:1579387-1579819(+)	62048	0.359878	1	0.302239	No		NZ_CM000488.1:3224185-3224578(-)	37713	0.218735	2	0.0207043	No
NZ_CM000488.1:2499266-2500692(-)	52122	0.302308	1	0.260889	No		NZ_CM000488.1:1269007-1269355(-)	135755	0.787379	2	0.186678	No		NZ_CM000488.1:2994711-2994903(+)	223597	1.29686	1	0.726612	No
NZ_CM000488.1:2584639-2585248(-)	364825	2.11599	1	0.879485	No		NZ_CM000488.1:148355-148751(+)	264417	1.53362	1	0.784246	No		NZ_CM000488.1:3278563-3279242(+)	69907	0.405461	1	0.33333	No
NZ_CM000488.1:2809758-2810898(-)	32152	0.186482	1	0.170126	No		NZ_CM000488.1:1695140-1696456(+)	57609	0.334132	2	0.0448159	No		NZ_CM000488.1:3475553-3476846(-)	187646	1.08835	2	0.296702	No
NZ_CM000488.1:2600733-2602545(-)	540713	3.13614	1	0.95655	No		NZ_CM000488.1:2978727-2979999(-)	630304	3.65576	6	0.163641	No		NZ_CM000488.1:144523-145819(+)	332236	1.92697	1	0.854411	No
NZ_CM000488.1:3776942-3778253(-)	161999	0.939594	2	0.242033	No		NZ_CM000488.1:2584639-2585248(-)	631839	3.66467	6	0.164895	No		NZ_CM000488.1:1511641-1513264(+)	41439	0.240346	1	0.213644	No
NZ_CM000488.1:1680881-1681784(+)	502612	2.91515	1	0.945804	No		NZ_CM000488.1:1219124-1220762(+)	1317230	7.63993	4	0.946073	No		NZ_CM000488.1:4143292-4144498(-)	75992	0.440754	1	0.356449	No
NZ_CM000488.1:3806747-3807386(-)	167696	0.972637	1	0.621915	No		NZ_CM000488.1:2600733-2602545(-)	430666	2.49786	4	0.241967	No		NZ_CM000488.1:2426570-2426945(-)	197192	1.14371	1	0.681366	No
NZ_CM000488.1:1925856-1928586(+)	249476	1.44696	3	0.177962	No		NZ_CM000488.1:1807084-1820701(+)	4426537	25.6739	24	0.656075	No		NZ_CM000488.1:2544615-2546082(-)	162199	0.940754	4	0.0155686	No
NZ_CM000488.1:1611787-1612282(+)	51852	0.300742	1	0.259731	No		NZ_CM000488.1:750257-751389(+)	73911	0.428684	1	0.348634	No		NZ_CM000488.1:3264416-3265148(-)	69827	0.404997	1	0.333021	No
NZ_CM000488.1:132879-134070(+)	1701459	9.86846	5	0.968159	No		NZ_CM000488.1:58780-59395(+)	365160	2.11793	1	0.879719	No		NZ_CM000488.1:2619576-2619750(-)	92482	0.536396	1	0.415147	No
NZ_CM000488.1:1720474-1721257(+)	21237	0.123175	1	0.115891	No		NZ_CM000488.1:510631-512167(+)	157400	0.91292	1	0.598649	No		NZ_CM000488.1:2547450-2548539(-)	61110	0.354438	1	0.298432	No
NZ_CM000488.1:3252539-3254849(-)	89812	0.52091	1	0.40602	No		NZ_CM000488.1:2659531-2659666(+)	68983	0.400101	1	0.329748	No		NZ_CM000488.1:1559734-1560805(+)	398237	2.30977	1	0.900716	No
NZ_CM000488.1:2839308-2839956(+)	30220	0.175276	1	0.160775	No		NZ_CM000488.1:1608587-1609424(+)	42370	0.245746	1	0.217879	No		NZ_CM000488.1:125557-129157(+)	624117	3.61988	6	0.158629	No
NZ_CM000488.1:1664601-1664835(+)	141945	0.823281	2	0.1996	No		NZ_CM000488.1:2537902-2538964(-)	176870	1.02585	1	0.641507	No		NZ_CM000488.1:2195151-2195430(+)	1309692	7.59621	3	0.981188	No
NZ_CM000488.1:3840010-3841291(+)	293894	1.70459	2	0.508177	No		NZ_CM000488.1:1680881-1681784(+)	667469	3.87132	7	0.0977018	No		NZ_CM000488.1:3780062-3780461(-)	668111	3.87504	2	0.898826	No
NZ_CM000488.1:2905376-2907137(-)	332688	1.92959	1	0.854792	No		NZ_CM000488.1:3045769-3046096(-)	101220	0.587076	1	0.444049	No		NZ_CM000488.1:1562705-1563329(+)	380213	2.20524	1	0.889775	No
NZ_CM000488.1:3627307-3629833(-)	278803	1.61706	3	0.221059	No		NZ_CM000488.1:1820716-1833505(+)	4031548	23.383	26	0.320768	No		NZ_CM000488.1:712966-714709(+)	148546	0.861567	1	0.5775	No
NZ_CM000488.1:3186512-3187058(+)	185891	1.07817	1	0.659782	No		NZ_CM000488.1:1925856-1928586(+)	421265	2.44334	6	0.0383427	No		NZ_CM000488.1:119106-119805(+)	181758	1.0542	2	0.284169	No
NZ_CM000488.1:141191-141731(+)	313077	1.81585	2	0.541861	No		NZ_CM000488.1:1041265-1042114(+)	170338	0.98796	2	0.259812	No		NZ_CM000488.1:121914-125496(+)	459310	2.664	1	0.930331	No
NZ_CM000488.1:3630000-3630570(-)	888057	5.15073	2	0.964355	No		NZ_CM000488.1:132879-134070(+)	2260272	13.1096	14	0.439001	No		NZ_CM000488.1:2297149-2297683(-)	36892	0.213974	1	0.19263	No
NZ_CM000488.1:2966044-2967067(-)	1726802	10.0155	8	0.781168	No		NZ_CM000488.1:3219738-3221093(-)	66957	0.388351	1	0.321825	No		NZ_CM000488.1:3974074-3975778(-)	161159	0.934722	1	0.607305	No
NZ_CM000488.1:1610587-1610860(+)	24835	0.144043	1	0.134149	No		NZ_CM000488.1:1664601-1664835(+)	209620	1.2158	2	0.343074	No		NZ_CM000488.1:1100248-1101790(+)	69025	0.400345	1	0.329911	No
NZ_CM000488.1:3877958-3879506(-)	835172	4.844	3	0.861579	No		NZ_CM000488.1:2905376-2907137(-)	452423	2.62405	6	0.0508257	No		NZ_CM000488.1:1766547-1768110(+)	1000386	5.80224	5	0.687601	No
NZ_CM000488.1:3782871-3784380(-)	1481040	8.59003	7	0.753291	No		NZ_CM000488.1:3627307-3629833(-)	261356	1.51586	3	0.195146	No		NZ_CM000488.1:2904612-2905374(-)	240473	1.39474	1	0.752103	No
NZ_CM000488.1:3478403-3479165(-)	82415	0.478007	2	0.0836093	No		NZ_CM000488.1:4022529-4029534(-)	1031854	5.98475	4	0.84743	No		NZ_CM000488.1:1526127-1526286(-)	4466	0.0259028	1	0.0255702	No
NZ_CM000488.1:1034825-1036211(+)	51352	0.297842	1	0.257581	No		NZ_CM000488.1:3630000-3630570(-)	705153	4.08989	3	0.774774	No		NZ_CM000488.1:138198-138477(+)	51943	0.301269	1	0.260122	No
NZ_CM000488.1:1694517-1695144(+)	89017	0.516299	1	0.403275	No		NZ_CM000488.1:2966044-2967067(-)	1269460	7.36287	6	0.743221	No		NZ_CM000488.1:2838045-2839071(-)	121647	0.705553	1	0.506164	No
NZ_CM000488.1:1564615-1564978(-)	197513	1.14558	1	0.681959	No		NZ_CM000488.1:3782871-3784380(-)	1506203	8.73598	9	0.509087	No		NZ_CM000488.1:142398-142938(+)	195672	1.1349	1	0.678545	No
NZ_CM000488.1:147969-148335(+)	443532	2.57249	1	0.923654	No		NZ_CM000488.1:3876184-3877885(-)	141207	0.819001	1	0.559128	No		NZ_CM000488.1:3975777-3976794(-)	121718	0.705964	2	0.157881	No
NZ_CM000488.1:52760-53021(+)	499053	2.89451	4	0.329148	No		NZ_CM000488.1:147969-148335(+)	616990	3.57854	3	0.693436	No		NZ_CM000488.1:1770754-1771933(+)	359326	2.08409	1	0.87558	No
NZ_CM000488.1:2107953-2110779(-)	756295	4.38651	2	0.93297	No		NZ_CM000488.1:2107953-2110779(-)	1508229	8.74773	12	0.173224	No		NZ_CM000488.1:951696-951770(+)	72104	0.418203	1	0.341772	No
NZ_CM000488.1:504214-504550(+)	55575	0.322335	1	0.275545	No		NZ_CM000488.1:3356007-3356451(-)	32553	0.188807	1	0.172054	No		NZ_CM000488.1:166251-166327(+)	14931	0.0865998	1	0.082956	No
NZ_CM000488.1:103568-106001(+)	124222	0.720488	1	0.513485	No		NZ_CM000488.1:1833572-1850039(+)	3381593	19.6132	16	0.822534	No		NZ_CM000488.1:4153885-4153962(-)	7051	0.0408958	1	0.0400709	No
NZ_CM000488.1:1833572-1850039(+)	261407	1.51616	2	0.447569	No		NZ_CM000488.1:3268924-3272548(-)	449857	2.60917	2	0.734381	No		NZ_CM000488.1:2095105-2095292(-)	657466	3.8133	2	0.893746	No
NZ_CM000488.1:2885354-2886629(-)	404617	2.34678	2	0.679791	No		NZ_CM000488.1:140447-140816(+)	352983	2.0473	1	0.870917	No		NZ_CM000488.1:11705-14638(+)	106693	0.618819	1	0.46142	No
NZ_CM000488.1:140447-140816(+)	277657	1.61041	2	0.478425	No		NZ_CM000488.1:2951873-2952395(-)	380454	2.20663	2	0.647044	No		NZ_CM000488.1:966367-966441(+)	101132	0.586566	1	0.443766	No
NZ_CM000488.1:3773648-3774323(-)	577803	3.35126	3	0.650763	No		NZ_CM000488.1:3624738-3625077(-)	24008	0.139246	1	0.129986	No		NZ_CM000488.1:951879-951951(+)	66968	0.388414	3	0.00731939	No
NZ_CM000488.1:2903766-2903991(-)	16073	0.0932234	1	0.08901	No		NZ_CM000488.1:1772080-1773610(+)	371837	2.15665	2	0.634739	No		NZ_CM000488.1:3193464-3193537(-)	839543	4.86935	11	0.0114769	No
NZ_CM000488.1:3807505-3808363(-)	304110	1.76384	1	0.828614	No		NZ_CM000488.1:1539304-1540870(-)	840206	4.87319	6	0.361801	No		NZ_CM000488.1:194518-194593(+)	63883	0.370521	2	0.0538273	No
NZ_CM000488.1:2951873-2952395(-)	466379	2.705	1	0.93313	No		NZ_CM000488.1:2994920-2995862(-)	283988	1.64713	2	0.490158	No		NZ_CM000488.1:3176100-3177653(-)	6280	0.036424	1	0.0357686	No
NZ_CM000488.1:2363754-2364258(-)	231468	1.34251	1	0.738812	No		NZ_CM000488.1:2442590-2443358(-)	70676	0.409921	1	0.336297	No		NZ_CM000488.1:194254-194330(+)	5926	0.0343708	1	0.0337868	No
NZ_CM000488.1:1772080-1773610(+)	427920	2.48194	2	0.708975	No		NZ_CM000488.1:3835051-3835183(+)	3808300	22.0881	24	0.369733	No		NZ_CM000488.1:173193-176126(+)	93067	0.539789	1	0.417129	No
NZ_CM000488.1:2994920-2995862(-)	351712	2.03993	1	0.869962	No		NZ_CM000488.1:1686451-1687366(+)	8570	0.049706	1	0.0484909	No		NZ_CM000488.1:3449707-3450070(-)	16248849	94.2433	100	0.289928	No
NZ_CM000488.1:2442590-2443358(-)	103805	0.602069	2	0.122583	No		NZ_CM000488.1:3601585-3602803(-)	603035	3.4976	7	0.0651035	No		NZ_CM000488.1:3172421-3172508(-)	20350	0.11803	2	0.00644096	No
NZ_CM000488.1:2797022-2797289(-)	17265	0.100137	1	0.0952865	No		NZ_CM000488.1:2085248-2085785(-)	27959	0.162162	1	0.149697	No		NZ_CM000488.1:32017-32093(+)	16641	0.0965178	1	0.0920063	No
NZ_CM000488.1:2414579-2416349(-)	389364	2.25831	3	0.392877	No		NZ_CM000488.1:1103691-1104837(-)	1184393	6.86948	5	0.814765	No		NZ_CM000488.1:2813688-2813881(-)	1877542	10.8897	7	0.91674	No
NZ_CM000488.1:3601585-3602803(-)	395431	2.2935	2	0.667644	No		NZ_CM000488.1:1503550-1504684(+)	48759	0.282802	1	0.246331	No
NZ_CM000488.1:1103691-1104837(-)	458344	2.6584	5	0.130963	No		NZ_CM000488.1:2106684-2107938(-)	1143735	6.63366	4	0.897023	No
NZ_CM000488.1:2106684-2107938(-)	582264	3.37713	3	0.655828	No		NZ_CM000488.1:2416345-2417068(-)	239894	1.39139	3	0.164424	No
NZ_CM000488.1:129699-130116(+)	384717	2.23136	3	0.385682	No		NZ_CM000488.1:129699-130116(+)	348371	2.02055	1	0.867418	No
NZ_CM000488.1:3983119-3984217(-)	44661	0.259034	1	0.228203	No		NZ_CM000488.1:1610131-1610581(+)	46561	0.270054	1	0.236662	No
NZ_CM000488.1:1529805-1531134(+)	342291	1.98529	1	0.862659	No		NZ_CM000488.1:1650406-1652353(+)	37508	0.217546	1	0.19551	No
NZ_CM000488.1:3046119-3046575(-)	390780	2.26652	2	0.661353	No		NZ_CM000488.1:3035616-3036885(-)	3516	0.0203928	1	0.0201863	No
NZ_CM000488.1:3491795-3492518(-)	335996	1.94878	2	0.579952	No		NZ_CM000488.1:1529805-1531134(+)	539455	3.12884	6	0.0974607	No
NZ_CM000488.1:2053776-2054418(-)	703709	4.08151	2	0.914214	No		NZ_CM000488.1:3491795-3492518(-)	451336	2.61775	1	0.927033	No
NZ_CM000488.1:3785871-3786606(-)	605873	3.51406	4	0.466399	No		NZ_CM000488.1:2053776-2054418(-)	800827	4.6448	4	0.681542	No
NZ_CM000488.1:715733-716048(+)	166924	0.968159	1	0.620219	No		NZ_CM000488.1:3388020-3389409(-)	166728	0.967022	1	0.619787	No
NZ_CM000488.1:117886-118420(+)	15939	0.0924462	1	0.0883017	No		NZ_CM000488.1:3785871-3786606(-)	464421	2.69364	9	0.00188388	No
NZ_CM000488.1:3590285-3590804(-)	24759	0.143602	1	0.133768	No		NZ_CM000488.1:715733-716048(+)	132537	0.768715	1	0.536391	No
NZ_CM000488.1:1060762-1061530(+)	174141	1.01002	2	0.267926	No		NZ_CM000488.1:2114594-2115839(-)	92341	0.535578	1	0.414669	No
NZ_CM000488.1:2854079-2854364(-)	476239	2.76219	2	0.762405	No		NZ_CM000488.1:2859935-2860949(-)	80095	0.464551	1	0.371583	No
NZ_CM000488.1:4214246-4214381(-)	139368	0.808334	1	0.5544	No		NZ_CM000488.1:3877958-3879506(-)	1358626	7.88003	7	0.671754	No
NZ_CM000488.1:200245-202048(+)	470138	2.7268	2	0.756162	No		NZ_CM000488.1:2529559-2530912(-)	172263	0.999125	3	0.0801406	No
NZ_CM000488.1:2747183-2748017(-)	1396038	8.09702	9	0.420993	No		NZ_CM000488.1:4154424-4155717(-)	305758	1.7734	3	0.262266	No
NZ_CM000488.1:1232671-1232875(-)	46701	0.270866	1	0.237281	No		NZ_CM000488.1:2610132-2610543(-)	95377	0.553187	1	0.424886	No
NZ_CM000488.1:983564-983768(-)	80858	0.468976	1	0.374358	No		NZ_CM000488.1:2330945-2331242(-)	31026	0.179951	2	0.0143738	No
NZ_CM000488.1:1717193-1717934(+)	310204	1.79918	4	0.108577	No		NZ_CM000488.1:3780484-3781906(-)	1467149	8.50946	9	0.478196	No
NZ_CM000488.1:4206888-4207740(-)	161145	0.934641	1	0.607273	No		NZ_CM000488.1:2747183-2748017(-)	1251496	7.25868	1	0.999296	No
NZ_CM000488.1:2980163-2981282(-)	519775	3.0147	6	0.0854067	No		NZ_CM000488.1:1232671-1232875(-)	39313	0.228015	1	0.203888	No
NZ_CM000488.1:136988-137276(+)	474978	2.75487	3	0.51972	No		NZ_CM000488.1:841348-843298(-)	25175	0.146015	1	0.135855	No
NZ_CM000488.1:3277315-3278452(+)	776549	4.50398	3	0.82687	No		NZ_CM000488.1:142970-143333(+)	286433	1.66131	2	0.494644	No
NZ_CM000488.1:3838845-3840006(+)	414509	2.40415	1	0.909658	No		NZ_CM000488.1:1717193-1717934(+)	273651	1.58718	1	0.795498	No
NZ_CM000488.1:3916286-3917243(-)	471971	2.73743	4	0.294177	No		NZ_CM000488.1:2495958-2497233(-)	198619	1.15199	1	0.683993	No
NZ_CM000488.1:2994711-2994903(+)	250464	1.45269	4	0.0598459	No		NZ_CM000488.1:1791963-1807101(+)	2408239	13.9678	12	0.737233	No
NZ_CM000488.1:3278563-3279242(+)	183835	1.06624	2	0.288593	No		NZ_CM000488.1:3511496-3512807(-)	55017	0.319099	1	0.273196	No
NZ_CM000488.1:2904612-2905374(-)	279023	1.61833	2	0.480971	No		NZ_CM000488.1:699534-700830(+)	51015	0.295887	1	0.256129	No
NZ_CM000488.1:144523-145819(+)	517367	3.00073	5	0.184859	No		NZ_CM000488.1:2980163-2981282(-)	547571	3.17591	2	0.825631	No
NZ_CM000488.1:4143292-4144498(-)	327091	1.89713	2	0.565434	No		NZ_CM000488.1:136988-137276(+)	526502	3.05371	1	0.952817	No
NZ_CM000488.1:2392769-2393819(-)	35125	0.203725	1	0.184313	No		NZ_CM000488.1:3277315-3278452(+)	865835	5.02184	6	0.387872	No
NZ_CM000488.1:129337-129586(+)	128005	0.742429	2	0.17068	No		NZ_CM000488.1:2994711-2994903(+)	143918	0.834724	2	0.20374	No
NZ_CM000488.1:141970-142369(+)	321842	1.86668	1	0.845364	No		NZ_CM000488.1:3475553-3476846(-)	347740	2.01689	2	0.598547	No
NZ_CM000488.1:3135256-3135694(-)	304516	1.76619	2	0.527029	No		NZ_CM000488.1:144523-145819(+)	640423	3.71445	7	0.0830883	No
NZ_CM000488.1:2544615-2546082(-)	265530	1.54007	1	0.785635	No		NZ_CM000488.1:2497255-2498239(-)	114691	0.665208	1	0.485833	No
NZ_CM000488.1:3476875-3478411(-)	188525	1.09345	1	0.66494	No		NZ_CM000488.1:2500712-2501804(-)	18271	0.105972	1	0.10055	No
NZ_CM000488.1:2619576-2619750(-)	108574	0.629729	2	0.131785	No		NZ_CM000488.1:1700947-1701946(+)	27489	0.159436	1	0.147376	No
NZ_CM000488.1:3825252-3828939(-)	493980	2.86508	2	0.779774	No		NZ_CM000488.1:141970-142369(+)	431317	2.50164	2	0.713039	No
NZ_CM000488.1:2990281-2993629(-)	24119	0.13989	1	0.130546	No		NZ_CM000488.1:2426570-2426945(-)	147933	0.858011	2	0.212195	No
NZ_CM000488.1:1559734-1560805(+)	671185	3.89287	3	0.745776	No		NZ_CM000488.1:1087466-1088879(+)	168651	0.978176	3	0.0763312	No
NZ_CM000488.1:990647-994301(+)	89999	0.521994	3	0.0161103	No		NZ_CM000488.1:1731540-1732656(+)	82247	0.477033	2	0.0833206	No
NZ_CM000488.1:2195151-2195430(+)	1092123	6.33431	2	0.986986	No		NZ_CM000488.1:3135256-3135694(-)	374000	2.1692	2	0.637859	No
NZ_CM000488.1:3626136-3627238(-)	148558	0.861636	1	0.57753	No		NZ_CM000488.1:2544615-2546082(-)	392798	2.27823	2	0.664094	No
NZ_CM000488.1:3365119-3365503(-)	50721	0.294182	1	0.254859	No		NZ_CM000488.1:3476875-3478411(-)	234949	1.3627	2	0.395224	No
NZ_CM000488.1:3780484-3781906(-)	1284685	7.45117	7	0.615137	No		NZ_CM000488.1:3365119-3365503(-)	75162	0.43594	1	0.353343	No
NZ_CM000488.1:3780062-3780461(-)	1177885	6.83173	11	0.0870082	No		NZ_CM000488.1:141753-141939(+)	208374	1.20857	1	0.701376	No
NZ_CM000488.1:1562705-1563329(+)	473253	2.74487	5	0.143841	No		NZ_CM000488.1:2619576-2619750(-)	106107	0.615421	1	0.459586	No
NZ_CM000488.1:2537320-2537878(-)	84627	0.490837	1	0.387886	No		NZ_CM000488.1:3773648-3774323(-)	388679	2.25434	3	0.391818	No
NZ_CM000488.1:712966-714709(+)	259583	1.50558	1	0.778112	No		NZ_CM000488.1:2547450-2548539(-)	130673	0.757903	2	0.176162	No
NZ_CM000488.1:1773611-1774043(+)	230085	1.33449	2	0.385348	No		NZ_CM000488.1:1559734-1560805(+)	455406	2.64135	2	0.7405	No
NZ_CM000488.1:2346826-2348008(-)	73320	0.425256	1	0.346398	No		NZ_CM000488.1:1919037-1921041(+)	271347	1.57381	2	0.466568	No
NZ_CM000488.1:119106-119805(+)	282308	1.63739	2	0.487061	No		NZ_CM000488.1:125557-129157(+)	1345239	7.80239	13	0.0547523	No
NZ_CM000488.1:121914-125496(+)	825613	4.78856	1	0.991676	No		NZ_CM000488.1:2195151-2195430(+)	994571	5.76851	4	0.826913	No
NZ_CM000488.1:4141666-4143070(-)	341513	1.98078	1	0.862038	No		NZ_CM000488.1:2856976-2857783(-)	66379	0.384998	1	0.319548	No
NZ_CM000488.1:1100248-1101790(+)	166466	0.965503	1	0.619208	No		NZ_CM000488.1:3838845-3840006(+)	170870	0.991046	1	0.628812	No
NZ_CM000488.1:2427057-2427522(-)	16896	0.0979968	1	0.0933482	No		NZ_CM000488.1:3626136-3627238(-)	156852	0.909742	2	0.231084	No
NZ_CM000488.1:1766547-1768110(+)	1264673	7.3351	9	0.315527	No		NZ_CM000488.1:3780062-3780461(-)	1308035	7.5866	8	0.488009	No
NZ_CM000488.1:3974074-3975778(-)	224693	1.30322	1	0.728344	No		NZ_CM000488.1:1562705-1563329(+)	467850	2.71353	1	0.933698	No
NZ_CM000488.1:624003-624621(+)	17439	0.101146	1	0.0961991	No		NZ_CM000488.1:3746246-3747248(-)	30405	0.176349	1	0.161675	No
NZ_CM000488.1:136365-136989(+)	242508	1.40655	2	0.410425	No		NZ_CM000488.1:3916286-3917243(-)	243733	1.41365	2	0.412871	No
NZ_CM000488.1:142398-142938(+)	287466	1.6673	1	0.811245	No		NZ_CM000488.1:1553453-1556900(+)	140912	0.81729	1	0.558373	No
NZ_CM000488.1:3812239-3813379(-)	2870	0.016646	1	0.0165082	No		NZ_CM000488.1:1212809-1214441(+)	159162	0.92314	1	0.60273	No
NZ_CM000488.1:729811-731242(+)	60520	0.351016	1	0.296028	No		NZ_CM000488.1:2346826-2348008(-)	153032	0.887586	2	0.222978	No
NZ_CM000488.1:3975777-3976794(-)	178407	1.03476	1	0.644689	No		NZ_CM000488.1:680767-680977(-)	26334	0.152737	1	0.141645	No
NZ_CM000488.1:1527594-1528710(+)	186169	1.07978	3	0.0955457	No		NZ_CM000488.1:1658194-1659097(+)	40701	0.236066	1	0.210271	No
NZ_CM000488.1:1770754-1771933(+)	496477	2.87957	2	0.782127	No		NZ_CM000488.1:119106-119805(+)	260154	1.50889	4	0.0667636	No
NZ_CM000488.1:168215-171126(+)	361608	2.09733	2	0.619697	No		NZ_CM000488.1:3378108-3378936(-)	34374	0.199369	1	0.180753	No
NZ_CM000488.1:98105-101038(+)	423005	2.45343	1	0.914002	No		NZ_CM000488.1:4865-6782(+)	87590	0.508022	1	0.398315	No
NZ_CM000488.1:166251-166327(+)	30065	0.174377	1	0.16002	No		NZ_CM000488.1:1766547-1768110(+)	1089295	6.31791	1	0.998196	No
NZ_CM000488.1:70178-70255(+)	32217	0.186859	1	0.170439	No		NZ_CM000488.1:2904612-2905374(-)	407651	2.36438	5	0.0914543	No
NZ_CM000488.1:2095105-2095292(-)	655546	3.80217	3	0.731453	No		NZ_CM000488.1:3357660-3358974(-)	73447	0.425993	1	0.346879	No
NZ_CM000488.1:11705-14638(+)	411941	2.38926	4	0.219035	No		NZ_CM000488.1:138198-138477(+)	123211	0.714624	2	0.160904	No
NZ_CM000488.1:3171985-3172058(-)	26095	0.151351	1	0.140454	No		NZ_CM000488.1:2838045-2839071(-)	133840	0.776272	1	0.539882	No
NZ_CM000488.1:966367-966441(+)	80654	0.467793	3	0.0120634	No		NZ_CM000488.1:142398-142938(+)	393979	2.28508	1	0.898234	No
NZ_CM000488.1:3172421-3172508(-)	21263	0.123325	2	0.00700734	No		NZ_CM000488.1:1527594-1528710(+)	219377	1.27239	1	0.719838	No
NZ_CM000488.1:3171264-3171338(-)	8188	0.0474904	1	0.0463804	No		NZ_CM000488.1:1770754-1771933(+)	403166	2.33836	3	0.414108	No
NZ_CM000488.1:90532-92087(+)	104708	0.607306	1	0.455184	No		NZ_CM000488.1:1262063-1262136(+)	44656	0.259005	2	0.0282758	No
NZ_CM000488.1:3193464-3193537(-)	643720	3.73358	11	0.00168537	No		NZ_CM000488.1:166251-166327(+)	26384	0.153027	2	0.01058	No
NZ_CM000488.1:92249-95182(+)	387010	2.24466	2	0.656184	No		NZ_CM000488.1:70178-70255(+)	46417	0.269219	1	0.236024	No
NZ_CM000488.1:3172739-3172815(-)	7819	0.0453502	1	0.0443372	No		NZ_CM000488.1:2095105-2095292(-)	2372563	13.7609	9	0.930284	No
NZ_CM000488.1:945995-947550(+)	91852	0.532742	5	0.000230068	No		NZ_CM000488.1:3171985-3172058(-)	20995	0.121771	1	0.114649	No
NZ_CM000488.1:173193-176126(+)	379716	2.20235	2	0.646003	No		NZ_CM000488.1:165827-165900(+)	21474	0.124549	2	0.00714133	No
NZ_CM000488.1:9807-11363(+)	117183	0.679661	1	0.493211	No		NZ_CM000488.1:3171264-3171338(-)	16854	0.0977532	1	0.0931273	No
NZ_CM000488.1:3449707-3450070(-)	21179486	122.841	128	0.332616	No		NZ_CM000488.1:3193464-3193537(-)	1041868	6.04283	12	0.0210743	No
NZ_CM000488.1:636665-639598(+)	334405	1.93955	4	0.132136	No		NZ_CM000488.1:92249-95182(+)	63347	0.367413	1	0.307476	No
NZ_CM000488.1:32173-35106(+)	384230	2.22853	5	0.0756183	No		NZ_CM000488.1:3176100-3177653(-)	10508	0.0609464	1	0.0591263	No
NZ_CM000488.1:165827-165900(+)	13667	0.0792686	1	0.0762082	No		NZ_CM000488.1:951341-951418(+)	17077	0.0990466	1	0.0942995	No
NZ_CM000488.1:96388-97943(+)	119856	0.695165	1	0.501008	No		NZ_CM000488.1:173193-176126(+)	68097	0.394963	1	0.326295	No
NZ_CM000488.1:947715-950649(+)	179273	1.03978	2	0.278873	No		NZ_CM000488.1:95371-95447(+)	12867	0.0746286	1	0.0719119	No
NZ_CM000488.1:2813688-2813881(-)	2537791	14.7192	18	0.22781	No		NZ_CM000488.1:3449707-3450070(-)	20025189	116.146	121	0.338378	No
							NZ_CM000488.1:11549-11625(+)	26027	0.150957	3	0.00051218	No
							NZ_CM000488.1:32017-32093(+)	28667	0.166269	1	0.153181	No
							NZ_CM000488.1:2813688-2813881(-)	2798104	16.229	12	0.883964	No
							NZ_CM000488.1:951696-951770(+)	183628	1.06504	2	0.288153	No

## Sheet: Table 5. Hotspot_M. florum
Biological replicate 1							Biological replicate 2							Biological replicate 2
				p-value after Bonferroni correction:	0.000322581						p-value after Bonferroni correction:	0.00037037						p-value after Bonferroni correction:	0.000446429		The number of hotspot genes supported by at least two replicates: 4
Gene_ID	Coverage	Expected number of transcription errors	Observed number of transcription errors	Poisson cumulative probability of >= observed mutations in the gene	Significant		Gene_ID	Coverage	Expected number of transcription errors	Observed number of transcription errors	Poisson cumulative probability of >= observed mutations in the gene	Significant		Gene_ID	Coverage	Expected number of transcription errors	Observed number of transcription errors	Poisson cumulative probability of >= observed mutations in the gene	Significant
NC_006055.1:727921-729106(-)	6856026	124.78	212	7.85372e-13	Yes		NC_006055.1:727921-729106(-)	5700555	103.75	176	6.88603e-11	Yes		NC_006055.1:727921-729106(-)	4066830	74.0163	114	9.77685e-06	Yes
NC_006055.1:394743-395877(-)	1623772	29.5527	67	2.38562e-09	Yes		NC_006055.1:672922-673936(-)	10920380	198.751	265	4.33493e-06	Yes		NC_006055.1:672922-673936(-)	7539363	137.216	209	7.5256e-09	Yes
NC_006055.1:672922-673936(-)	11709944	213.121	358	0	Yes		NC_006055.1:596335-596411(-)	12437	0.226353	4	9.13259e-05	Yes		NC_006055.1:441657-441732(-)	427438	7.77937	23	7.36497e-06	Yes
NC_006055.1:596335-596411(-)	37532	0.683082	23	0	Yes		NC_006055.1:441657-441732(-)	488787	8.89592	23	5.63849e-05	Yes		NC_006055.1:596335-596411(-)	15280	0.278096	13	0	Yes
NC_006055.1:441657-441732(-)	867525	15.789	82	0	Yes		NC_006055.1:247141-248302(+)	24613	0.447957	1	0.361068	No		NC_006055.1:405123-407091(-)	31214	0.568095	2	0.111511	No
NC_006055.1:691815-691891(-)	191273	3.48117	15	4.00159e-06	Yes		NC_006055.1:405123-407091(-)	63838	1.16185	3	0.112347	No		NC_006055.1:721512-722445(-)	84258	1.5335	7	0.00105031	No
NC_006055.1:405123-407091(-)	75507	1.37423	3	0.160309	No		NC_006055.1:721512-722445(-)	147420	2.68304	3	0.502213	No		NC_006055.1:202811-203783(+)	253389	4.61168	6	0.316257	No
NC_006055.1:721512-722445(-)	173899	3.16496	5	0.213175	No		NC_006055.1:202811-203783(+)	387249	7.04793	13	0.0282845	No		NC_006055.1:781760-783713(-)	15850	0.28847	1	0.250591	No
NC_006055.1:202811-203783(+)	448317	8.15937	15	0.0201192	No		NC_006055.1:96736-98035(+)	37699	0.686122	1	0.496475	No		NC_006055.1:591599-592427(-)	137608	2.50447	5	0.109419	No
NC_006055.1:106501-107935(+)	51603	0.939175	1	0.60905	No		NC_006055.1:106501-107935(+)	33235	0.604877	2	0.12351	No		NC_006055.1:426999-428433(-)	87800	1.59796	2	0.47441	No
NC_006055.1:781760-783713(-)	51704	0.941013	3	0.0697775	No		NC_006055.1:781760-783713(-)	24178	0.44004	1	0.355989	No		NC_006055.1:694197-695151(-)	1778566	32.3699	30	0.685205	No
NC_006055.1:591599-592427(-)	260860	4.74765	3	0.852421	No		NC_006055.1:591599-592427(-)	253067	4.60582	2	0.943978	No		NC_006055.1:487743-488772(-)	140277	2.55304	3	0.469719	No
NC_006055.1:160491-160884(+)	55748	1.01461	1	0.637458	No		NC_006055.1:590774-591596(-)	47312	0.861078	2	0.213311	No		NC_006055.1:442021-443146(-)	106676	1.9415	1	0.856512	No
NC_006055.1:426999-428433(-)	172138	3.13291	1	0.956409	No		NC_006055.1:426999-428433(-)	134476	2.44746	2	0.70175	No		NC_006055.1:667569-668787(-)	105611	1.92212	3	0.302255	No
NC_006055.1:694197-695151(-)	2542180	46.2677	45	0.593605	No		NC_006055.1:694197-695151(-)	2182522	39.7219	50	0.0643706	No		NC_006055.1:31148-31826(+)	59354	1.08024	1	0.660487	No
NC_006055.1:53675-54788(+)	693956	12.63	10	0.808335	No		NC_006055.1:442021-443146(-)	149263	2.71659	8	0.0068556	No		NC_006055.1:52657-53662(+)	255785	4.65529	6	0.323801	No
NC_006055.1:487743-488772(-)	262594	4.77921	3	0.855478	No		NC_006055.1:138855-140295(+)	1242991	22.6224	27	0.20391	No		NC_006055.1:132934-133558(+)	24304	0.442333	2	0.0732496	No
NC_006055.1:442021-443146(-)	189513	3.44914	3	0.669643	No		NC_006055.1:667569-668787(-)	130113	2.36806	3	0.421924	No		NC_006055.1:138000-138846(+)	302601	5.50734	2	0.9736	No
NC_006055.1:138855-140295(+)	1653357	30.0911	21	0.965919	No		NC_006055.1:31148-31826(+)	98636	1.79518	2	0.535726	No		NC_006055.1:134106-134961(+)	250268	4.55488	8	0.0911752	No
NC_006055.1:667569-668787(-)	195868	3.5648	9	0.0110128	No		NC_006055.1:52657-53662(+)	409094	7.44551	12	0.0760931	No		NC_006055.1:586502-588062(-)	105905	1.92747	2	0.574007	No
NC_006055.1:130853-131153(-)	53818	0.979488	2	0.256696	No		NC_006055.1:120495-123477(+)	8229	0.149768	1	0.139092	No		NC_006055.1:136423-138001(+)	1358959	24.7331	24	0.585535	No
NC_006055.1:31148-31826(+)	122341	2.22661	1	0.892106	No		NC_006055.1:225424-226732(+)	106369	1.93592	2	0.576371	No		NC_006055.1:432356-432707(-)	541762	9.86007	4	0.988552	No
NC_006055.1:52657-53662(+)	442380	8.05132	5	0.903268	No		NC_006055.1:200441-200921(+)	68754	1.25132	1	0.713874	No		NC_006055.1:95429-96719(+)	23917	0.435289	1	0.352923	No
NC_006055.1:484208-485333(-)	554202	10.0865	11	0.427778	No		NC_006055.1:132934-133558(+)	52606	0.957429	1	0.616122	No		NC_006055.1:227762-228035(+)	102292	1.86171	1	0.844594	No
NC_006055.1:200441-200921(+)	88203	1.60529	1	0.79917	No		NC_006055.1:138000-138846(+)	438023	7.97202	2	0.996905	No		NC_006055.1:282862-284143(+)	82865	1.50814	3	0.1932	No
NC_006055.1:731901-732315(-)	34776	0.632923	1	0.468963	No		NC_006055.1:134106-134961(+)	301462	5.48661	4	0.796779	No		NC_006055.1:484208-485333(-)	331364	6.03082	6	0.559259	No
NC_006055.1:138000-138846(+)	559936	10.1908	5	0.974157	No		NC_006055.1:586502-588062(-)	152130	2.76877	1	0.937261	No		NC_006055.1:551919-553281(-)	728289	13.2549	21	0.0298289	No
NC_006055.1:745534-746218(-)	4876	0.0887432	1	0.0849195	No		NC_006055.1:136423-138001(+)	1742788	31.7187	26	0.8671	No		NC_006055.1:158855-159614(+)	9694	0.176431	1	0.161743	No
NC_006055.1:134106-134961(+)	405981	7.38885	3	0.977942	No		NC_006055.1:432356-432707(-)	862809	15.7031	15	0.604363	No		NC_006055.1:488826-490962(-)	1685541	30.6768	39	0.0827125	No
NC_006055.1:158216-158855(+)	8817	0.160469	1	0.148256	No		NC_006055.1:186748-187198(-)	320957	5.84142	5	0.693156	No		NC_006055.1:55797-57066(+)	481785	8.76849	8	0.648302	No
NC_006055.1:586502-588062(-)	189581	3.45037	6	0.135898	No		NC_006055.1:484208-485333(-)	422864	7.69612	10	0.24646	No		NC_006055.1:474633-475914(-)	51005	0.928291	1	0.604771	No
NC_006055.1:136423-138001(+)	2297159	41.8083	38	0.742783	No		NC_006055.1:98069-99113(+)	91886	1.67233	3	0.23549	No		NC_006055.1:135321-135855(+)	596575	10.8577	6	0.959163	No
NC_006055.1:432356-432707(-)	937067	17.0546	16	0.63348	No		NC_006055.1:551919-553281(-)	906608	16.5003	27	0.010768	No		NC_006055.1:638401-638965(+)	13132	0.239002	1	0.212587	No
NC_006055.1:95429-96719(+)	74145	1.34944	5	0.01235	No		NC_006055.1:158855-159614(+)	10282	0.187132	1	0.170666	No		NC_006055.1:592451-594968(-)	7099408	129.209	70	1	No
NC_006055.1:227762-228035(+)	168844	3.07296	4	0.36911	No		NC_006055.1:488826-490962(-)	1794338	32.657	37	0.24553	No		NC_006055.1:57081-58890(+)	265078	4.82442	5	0.528177	No
NC_006055.1:186748-187198(-)	445103	8.10087	2	0.99724	No		NC_006055.1:55797-57066(+)	712108	12.9604	11	0.744899	No		NC_006055.1:25860-27675(+)	378267	6.88446	9	0.255974	No
NC_006055.1:551919-553281(-)	1074698	19.5595	18	0.668433	No		NC_006055.1:135321-135855(+)	857566	15.6077	14	0.692401	No		NC_006055.1:27766-29887(+)	95392	1.73613	2	0.517893	No
NC_006055.1:610539-611010(-)	25377	0.461861	2	0.078867	No		NC_006055.1:58891-59860(+)	250916	4.56667	2	0.942148	No		NC_006055.1:579036-579489(-)	131032	2.38478	3	0.42631	No
NC_006055.1:158855-159614(+)	24150	0.43953	1	0.355661	No		NC_006055.1:149859-150123(+)	910	0.016562	1	0.0164256	No		NC_006055.1:455431-455887(-)	116906	2.12769	6	0.0216253	No
NC_006055.1:570384-570774(-)	14771	0.268832	1	0.235729	No		NC_006055.1:57081-58890(+)	436562	7.94543	3	0.985648	No		NC_006055.1:394010-394742(-)	545931	9.93594	7	0.865767	No
NC_006055.1:488826-490962(-)	3137096	57.0951	79	0.00347032	No		NC_006055.1:25860-27675(+)	533421	9.70826	10	0.505082	No		NC_006055.1:470876-472109(-)	37873	0.689289	4	0.0054547	No
NC_006055.1:55797-57066(+)	784568	14.2791	12	0.762801	No		NC_006055.1:219317-220370(-)	43886	0.798725	1	0.550098	No		NC_006055.1:487187-487751(-)	143688	2.61512	1	0.926841	No
NC_006055.1:135321-135855(+)	1089358	19.8263	10	0.994475	No		NC_006055.1:41443-42943(+)	24347	0.443115	1	0.357967	No		NC_006055.1:281157-282144(+)	68026	1.23807	1	0.710058	No
NC_006055.1:58891-59860(+)	284770	5.18281	1	0.994388	No		NC_006055.1:670095-670602(-)	67791	1.2338	2	0.349552	No		NC_006055.1:237896-240026(+)	144821	2.63574	2	0.739442	No
NC_006055.1:111620-112250(+)	69777	1.26994	3	0.136022	No		NC_006055.1:27766-29887(+)	163585	2.97725	3	0.571693	No		NC_006055.1:722437-723838(-)	527680	9.60378	14	0.10839	No
NC_006055.1:342230-342785(+)	7256	0.132059	1	0.123711	No		NC_006055.1:255373-256069(+)	25565	0.465283	1	0.372043	No		NC_006055.1:200993-201833(+)	639482	11.6386	16	0.130624	No
NC_006055.1:393213-393984(+)	28944	0.526781	1	0.409497	No		NC_006055.1:579036-579489(-)	151089	2.74982	3	0.5185	No		NC_006055.1:208507-209200(+)	398205	7.24733	11	0.117003	No
NC_006055.1:57081-58890(+)	480822	8.75096	11	0.264923	No		NC_006055.1:765063-766458(-)	51872	0.94407	1	0.610959	No		NC_006055.1:779746-781627(-)	13826	0.251633	1	0.22247	No
NC_006055.1:25860-27675(+)	601191	10.9417	9	0.762795	No		NC_006055.1:455431-455887(-)	148505	2.70279	1	0.932982	No		NC_006055.1:54787-55777(+)	429442	7.81584	6	0.791306	No
NC_006055.1:41443-42943(+)	39606	0.720829	1	0.513651	No		NC_006055.1:394010-394742(-)	837264	15.2382	8	0.984317	No		NC_006055.1:134978-135293(+)	236485	4.30403	10	0.0129816	No
NC_006055.1:27766-29887(+)	209127	3.80611	3	0.732089	No		NC_006055.1:68964-69918(-)	49830	0.906906	1	0.596228	No		NC_006055.1:105089-106436(+)	111955	2.03758	1	0.869656	No
NC_006055.1:579036-579489(-)	182556	3.32252	4	0.424631	No		NC_006055.1:487187-487751(-)	182438	3.32037	1	0.963861	No		NC_006055.1:275256-278112(-)	44875	0.816725	2	0.197232	No
NC_006055.1:765063-766458(-)	103222	1.87864	2	0.56015	No		NC_006055.1:281157-282144(+)	90015	1.63827	3	0.226578	No		NC_006055.1:32115-34194(+)	215155	3.91582	12	0.00076471	No
NC_006055.1:455431-455887(-)	212307	3.86399	2	0.897933	No		NC_006055.1:237896-240026(+)	183209	3.3344	2	0.84554	No		NC_006055.1:160103-160469(+)	81477	1.48288	2	0.436429	No
NC_006055.1:394010-394742(-)	886420	16.1328	2	0.999998	No		NC_006055.1:140685-141090(+)	47005	0.855491	2	0.211278	No		NC_006055.1:778356-779682(-)	244435	4.44872	3	0.820571	No
NC_006055.1:155179-155800(+)	44361	0.80737	1	0.553971	No		NC_006055.1:162344-163565(+)	14006	0.254909	1	0.225013	No		NC_006055.1:70614-73446(+)	12715	0.231413	1	0.206588	No
NC_006055.1:319779-320292(+)	46621	0.848502	2	0.208738	No		NC_006055.1:588124-589072(-)	30620	0.557284	1	0.427237	No		NC_006055.1:589160-590759(-)	101101	1.84004	2	0.54897	No
NC_006055.1:470876-472109(-)	88851	1.61709	1	0.801524	No		NC_006055.1:690794-691646(+)	390036	7.09866	6	0.711714	No		NC_006055.1:61125-61926(+)	19543	0.355683	1	0.299305	No
NC_006055.1:487187-487751(-)	280865	5.11174	2	0.963173	No		NC_006055.1:200993-201833(+)	826580	15.0438	14	0.640953	No		NC_006055.1:201850-202687(+)	733921	13.3574	10	0.856518	No
NC_006055.1:674971-676156(-)	24713	0.449777	1	0.362229	No		NC_006055.1:670869-671556(+)	23976	0.436363	1	0.353617	No		NC_006055.1:630502-632482(-)	31514	0.573555	1	0.436481	No
NC_006055.1:281157-282144(+)	104782	1.90703	1	0.85148	No		NC_006055.1:208507-209200(+)	540163	9.83097	7	0.858835	No		NC_006055.1:670095-670602(-)	47546	0.865337	1	0.57909	No
NC_006055.1:233208-234171(+)	16837	0.306433	1	0.263932	No		NC_006055.1:213720-214737(+)	17480	0.318136	1	0.272496	No		NC_006055.1:40464-41442(+)	28327	0.515551	1	0.402829	No
NC_006055.1:237896-240026(+)	277341	5.04761	4	0.741593	No		NC_006055.1:54787-55777(+)	636526	11.5848	13	0.376662	No		NC_006055.1:394743-395877(-)	880699	16.0287	28	0.00420235	No
NC_006055.1:690794-691646(+)	535707	9.74987	9	0.638324	No		NC_006055.1:134978-135293(+)	315592	5.74377	13	0.0062902	No		NC_006055.1:138855-140295(+)	943746	17.1762	16	0.644343	No
NC_006055.1:208507-209200(+)	703723	12.8078	17	0.150997	No		NC_006055.1:105089-106436(+)	165346	3.0093	2	0.802236	No		NC_006055.1:218549-218912(+)	79600	1.44872	1	0.765129	No
NC_006055.1:213720-214737(+)	27916	0.508071	1	0.398345	No		NC_006055.1:32115-34194(+)	374293	6.81213	8	0.373317	No		NC_006055.1:61952-62552(-)	145810	2.65374	4	0.275737	No
NC_006055.1:7235-9713(+)	23600	0.42952	1	0.349179	No		NC_006055.1:160103-160469(+)	94746	1.72438	3	0.249225	No		NC_006055.1:210161-212309(+)	931828	16.9593	18	0.432055	No
NC_006055.1:282862-284143(+)	184207	3.35257	1	0.965006	No		NC_006055.1:768614-769328(-)	6051	0.110128	1	0.104281	No		NC_006055.1:199470-200433(+)	153868	2.8004	3	0.530641	No
NC_006055.1:54787-55777(+)	670232	12.1982	8	0.918804	No		NC_006055.1:624395-625418(-)	21331	0.388224	4	0.00069523	No		NC_006055.1:287376-288795(+)	108325	1.97151	2	0.586229	No
NC_006055.1:134978-135293(+)	394741	7.18429	11	0.112117	No		NC_006055.1:778356-779682(-)	342162	6.22735	7	0.430163	No		NC_006055.1:63481-64273(+)	283842	5.16592	9	0.0794655	No
NC_006055.1:200993-201833(+)	990344	18.0243	30	0.00605074	No		NC_006055.1:589160-590759(-)	214121	3.897	6	0.198986	No		NC_006055.1:59861-61052(+)	116211	2.11504	1	0.879372	No
NC_006055.1:105089-106436(+)	211462	3.84861	3	0.738864	No		NC_006055.1:719950-721402(-)	969483	17.6446	25	0.0572669	No		NC_006055.1:226737-227742(+)	107410	1.95486	2	0.581639	No
NC_006055.1:288934-291430(+)	18510	0.336882	1	0.286007	No		NC_006055.1:729246-731316(-)	74041	1.34755	2	0.389926	No		NC_006055.1:53675-54788(+)	398377	7.25046	8	0.438551	No
NC_006055.1:32115-34194(+)	413911	7.53318	6	0.762173	No		NC_006055.1:201850-202687(+)	959755	17.4675	10	0.979547	No		NC_006055.1:159626-159863(+)	25622	0.46632	1	0.372694	No
NC_006055.1:621768-623934(-)	84238	1.53313	2	0.453202	No		NC_006055.1:630502-632482(-)	57119	1.03957	1	0.646392	No		NC_006055.1:690794-691646(+)	276741	5.03669	9	0.0705148	No
NC_006055.1:624395-625418(-)	21585	0.392847	2	0.0596444	No		NC_006055.1:206086-208021(+)	104856	1.90838	4	0.126734	No		NC_006055.1:203833-205270(+)	450590	8.20074	9	0.43545	No
NC_006055.1:778356-779682(-)	432819	7.87731	8	0.529786	No		NC_006055.1:394743-395877(-)	1411189	25.6836	38	0.0135117	No		NC_006055.1:219317-220370(-)	34480	0.627536	1	0.466094	No
NC_006055.1:589160-590759(-)	210760	3.83583	5	0.339127	No		NC_006055.1:451971-453162(-)	39707	0.722667	2	0.163721	No		NC_006055.1:208058-208367(+)	32532	0.592082	1	0.446826	No
NC_006055.1:61125-61926(+)	40876	0.743943	2	0.171215	No		NC_006055.1:443147-443633(-)	16023	0.291619	1	0.252947	No		NC_006055.1:749712-750603(-)	425164	7.73798	2	0.996191	No
NC_006055.1:30125-30965(+)	37300	0.67886	1	0.492805	No		NC_006055.1:218549-218912(+)	99188	1.80522	3	0.270778	No		NC_006055.1:729246-731316(-)	63044	1.1474	2	0.318284	No
NC_006055.1:719950-721402(-)	1186496	21.5942	26	0.197129	No		NC_006055.1:61952-62552(-)	176751	3.21687	2	0.830986	No		NC_006055.1:51297-52656(+)	511357	9.3067	10	0.452932	No
NC_006055.1:729246-731316(-)	133363	2.42721	3	0.437383	No		NC_006055.1:210161-212309(+)	1486911	27.0618	20	0.932766	No		NC_006055.1:315751-319762(+)	89918	1.63651	2	0.486781	No
NC_006055.1:201850-202687(+)	1211932	22.0572	15	0.953433	No		NC_006055.1:199470-200433(+)	210235	3.82628	4	0.531876	No		NC_006055.1:91752-93096(+)	719741	13.0993	22	0.0152002	No
NC_006055.1:592451-594968(-)	12378951	225.297	116	1	No		NC_006055.1:287376-288795(+)	169766	3.08974	2	0.813861	No		NC_006055.1:747089-748016(-)	6482	0.117972	1	0.111279	No
NC_006055.1:630502-632482(-)	89672	1.63203	1	0.804468	No		NC_006055.1:99129-99690(+)	24685	0.449267	1	0.361904	No		NC_006055.1:93150-94500(+)	127486	2.32025	4	0.204782	No
NC_006055.1:206086-208021(+)	130586	2.37667	5	0.092965	No		NC_006055.1:63481-64273(+)	418388	7.61466	12	0.0861312	No		NC_006055.1:719950-721402(-)	639798	11.6443	8	0.893767	No
NC_006055.1:670095-670602(-)	82941	1.50953	1	0.778985	No		NC_006055.1:59861-61052(+)	192225	3.49849	1	0.969757	No		NC_006055.1:689955-690786(+)	122985	2.23833	1	0.893363	No
NC_006055.1:40464-41442(+)	84836	1.54402	2	0.456797	No		NC_006055.1:226737-227742(+)	183141	3.33317	1	0.96432	No		NC_006055.1:671595-672810(-)	1797001	32.7054	39	0.155348	No
NC_006055.1:501264-502704(-)	130748	2.37961	2	0.687094	No		NC_006055.1:53675-54788(+)	613183	11.1599	9	0.781907	No		NC_006055.1:646409-648071(-)	81224	1.47828	1	0.77197	No
NC_006055.1:451971-453162(-)	58676	1.0679	2	0.289203	No		NC_006055.1:592451-594968(-)	10978457	199.808	107	1	No		NC_006055.1:209216-210152(+)	149785	2.72609	6	0.0588513	No
NC_006055.1:659620-660457(-)	14666	0.266921	1	0.234267	No		NC_006055.1:203833-205270(+)	615821	11.2079	19	0.0209076	No		NC_006055.1:485387-487166(-)	923802	16.8132	17	0.514182	No
NC_006055.1:218331-218526(+)	28816	0.524451	3	0.0163096	No		NC_006055.1:224762-225422(+)	29345	0.534079	1	0.413791	No		NC_006055.1:472160-474524(-)	1589199	28.9234	25	0.79187	No
NC_006055.1:218549-218912(+)	136777	2.48934	5	0.107403	No		NC_006055.1:102861-103734(+)	22908	0.416926	1	0.34093	No		NC_006055.1:166495-170785(+)	166669	3.03338	2	0.805782	No
NC_006055.1:727495-727855(-)	66844	1.21656	3	0.124124	No		NC_006055.1:94550-95225(+)	93612	1.70374	1	0.817998	No		NC_006055.1:112384-114139(+)	170443	3.10206	3	0.599283	No
NC_006055.1:61952-62552(-)	242560	4.41459	12	0.00206186	No		NC_006055.1:539921-541943(-)	109066	1.985	2	0.589919	No		NC_006055.1:450509-451484(-)	77869	1.41722	1	0.757612	No
NC_006055.1:210161-212309(+)	1969682	35.8482	34	0.643694	No		NC_006055.1:749712-750603(-)	514249	9.35933	7	0.82402	No		NC_006055.1:170805-173346(+)	358799	6.53014	3	0.957911	No
NC_006055.1:474633-475914(-)	84326	1.53473	1	0.784487	No		NC_006055.1:51297-52656(+)	759961	13.8313	17	0.229659	No		NC_006055.1:533192-533795(-)	5594528	101.82	95	0.763526	No
NC_006055.1:199470-200433(+)	288730	5.25489	14	0.00111117	No		NC_006055.1:453176-454484(-)	28620	0.520884	1	0.406005	No		NC_006055.1:404836-405088(-)	60119	1.09417	1	0.665181	No
NC_006055.1:99129-99690(+)	28609	0.520684	1	0.405886	No		NC_006055.1:315751-319762(+)	172225	3.13449	2	0.82006	No		NC_006055.1:135859-136411(+)	212385	3.86541	1	0.979046	No
NC_006055.1:63481-64273(+)	480388	8.74306	18	0.00399333	No		NC_006055.1:91752-93096(+)	1078150	19.6223	26	0.0961396	No		NC_006055.1:140305-140605(+)	160841	2.92731	3	0.560328	No
NC_006055.1:59861-61052(+)	193139	3.51513	1	0.970256	No		NC_006055.1:93150-94500(+)	195177	3.55222	4	0.474593	No		NC_006055.1:724727-727352(-)	134135	2.44126	1	0.912949	No
NC_006055.1:226737-227742(+)	196008	3.56735	1	0.971769	No		NC_006055.1:689955-690786(+)	148448	2.70175	5	0.137353	No		NC_006055.1:562654-562744(-)	362319	6.59421	2	0.989609	No
NC_006055.1:538303-539896(-)	59029	1.07433	1	0.658473	No		NC_006055.1:153834-154224(+)	29991	0.545836	1	0.420643	No		NC_006055.1:191845-193373(+)	1481106	26.9561	7	0.999999	No
NC_006055.1:159626-159863(+)	42218	0.768368	1	0.53623	No		NC_006055.1:450509-451484(-)	113378	2.06348	2	0.610904	No		NC_006055.1:616279-616356(-)	10992	0.200054	1	0.181314	No
NC_006055.1:203833-205270(+)	722317	13.1462	16	0.249468	No		NC_006055.1:671595-672810(-)	2275684	41.4174	43	0.423345	No		NC_006055.1:468401-469929(-)	1498942	27.2807	7	0.999999	No
NC_006055.1:671595-672810(-)	2686666	48.8973	52	0.347288	No		NC_006055.1:160909-161863(+)	75092	1.36667	1	0.745047	No		NC_006055.1:326733-326807(+)	365178	6.64624	5	0.792224	No
NC_006055.1:102861-103734(+)	36928	0.67209	2	0.146163	No		NC_006055.1:447504-450231(-)	21208	0.385986	1	0.32022	No		NC_006055.1:465458-468194(-)	3110541	56.6118	31	0.999922	No
NC_006055.1:94550-95225(+)	99975	1.81954	2	0.542953	No		NC_006055.1:646409-648071(-)	142018	2.58473	2	0.729652	No		NC_006055.1:596033-596126(-)	17855	0.324961	1	0.277444	No
NC_006055.1:539921-541943(-)	139912	2.5464	4	0.252387	No		NC_006055.1:722437-723838(-)	708405	12.893	7	0.972444	No		NC_006055.1:130740-130816(+)	6395	0.116389	1	0.109871	No
NC_006055.1:749712-750603(-)	563522	10.2561	11	0.448966	No		NC_006055.1:209216-210152(+)	246924	4.49402	3	0.825748	No		NC_006055.1:691815-691891(-)	47934	0.872399	4	0.0121389	No
NC_006055.1:578641-579037(-)	48074	0.874947	1	0.583116	No		NC_006055.1:779746-781627(-)	26281	0.478314	2	0.0837003	No		NC_006055.1:193580-196316(+)	3131262	56.989	26	0.999998	No
NC_006055.1:51297-52656(+)	825164	15.018	23	0.033112	No		NC_006055.1:485387-487166(-)	1115681	20.3054	27	0.0888448	No		NC_006055.1:595947-596023(-)	15450	0.28119	1	0.245115	No
NC_006055.1:272801-273209(-)	33977	0.618381	1	0.461184	No		NC_006055.1:472160-474524(-)	1947875	35.4513	32	0.741482	No
NC_006055.1:754986-756195(-)	673	0.0122486	1	0.0121739	No		NC_006055.1:166495-170785(+)	316463	5.75963	1	0.996848	No
NC_006055.1:315751-319762(+)	209138	3.80631	5	0.333383	No		NC_006055.1:353410-354769(-)	78861	1.43527	2	0.420281	No
NC_006055.1:91752-93096(+)	1266207	23.045	39	0.00151066	No		NC_006055.1:17727-18645(+)	27523	0.500919	1	0.394026	No
NC_006055.1:93150-94500(+)	207026	3.76787	2	0.889857	No		NC_006055.1:112384-114139(+)	296067	5.38842	1	0.995431	No
NC_006055.1:296633-301808(+)	2063	0.0375466	1	0.0368505	No		NC_006055.1:170805-173346(+)	589953	10.7371	3	0.998493	No
NC_006055.1:689955-690786(+)	212792	3.87281	2	0.898647	No		NC_006055.1:533192-533795(-)	7891636	143.628	134	0.799888	No
NC_006055.1:34225-36583(+)	215494	3.92199	2	0.902537	No		NC_006055.1:135859-136411(+)	327828	5.96647	2	0.982143	No
NC_006055.1:153834-154224(+)	61382	1.11715	1	0.67279	No		NC_006055.1:140305-140605(+)	203866	3.71036	9	0.0139273	No
NC_006055.1:161883-162243(+)	8946	0.162817	1	0.150253	No		NC_006055.1:706622-709178(-)	57274	1.04239	3	0.0882609	No
NC_006055.1:160909-161863(+)	131883	2.40027	1	0.909307	No		NC_006055.1:264287-265391(+)	30788	0.560342	2	0.109023	No
NC_006055.1:646409-648071(-)	150974	2.74773	4	0.296456	No		NC_006055.1:724727-727352(-)	234014	4.25905	5	0.421637	No
NC_006055.1:151636-152056(+)	16589	0.30192	1	0.260603	No		NC_006055.1:595863-595940(-)	28024	0.510037	2	0.0932629	No
NC_006055.1:722437-723838(-)	848341	15.4398	15	0.578657	No		NC_006055.1:616279-616356(-)	13990	0.254618	1	0.224787	No
NC_006055.1:209216-210152(+)	281326	5.12013	1	0.994025	No		NC_006055.1:465458-468194(-)	4055169	73.8041	50	0.998604	No
NC_006055.1:779746-781627(-)	51351	0.934588	1	0.607252	No		NC_006055.1:326733-326807(+)	451928	8.22509	9	0.438839	No
NC_006055.1:648679-649396(-)	31120	0.566384	2	0.110961	No		NC_006055.1:595947-596023(-)	17685	0.321867	2	0.041918	No
NC_006055.1:485387-487166(-)	1691266	30.781	33	0.368101	No		NC_006055.1:691815-691891(-)	47933	0.872381	5	0.00205148	No
NC_006055.1:472160-474524(-)	2962688	53.9209	65	0.0779339	No		NC_006055.1:193580-196316(+)	4072262	74.1152	47	0.999693	No
NC_006055.1:166495-170785(+)	405313	7.3767	2	0.994759	No		NC_006055.1:441480-441569(-)	15328	0.27897	3	0.00293966	No
NC_006055.1:353410-354769(-)	87800	1.59796	3	0.216114	No		NC_006055.1:191845-193373(+)	1675454	30.4933	26	0.815821	No
NC_006055.1:17727-18645(+)	40232	0.732222	1	0.519161	No		NC_006055.1:468401-469929(-)	1678339	30.5458	13	0.999881	No
NC_006055.1:112384-114139(+)	354874	6.45871	4	0.885277	No		NC_006055.1:562654-562744(-)	317211	5.77324	1	0.99689	No
NC_006055.1:450509-451484(-)	141450	2.57439	1	0.9238	No
NC_006055.1:170805-173346(+)	656513	11.9485	5	0.992122	No
NC_006055.1:533192-533795(-)	8941440	162.734	138	0.978278	No
NC_006055.1:404836-405088(-)	88200	1.60524	2	0.47676	No
NC_006055.1:135859-136411(+)	400596	7.29085	2	0.994348	No
NC_006055.1:140305-140605(+)	239110	4.3518	4	0.632087	No
NC_006055.1:0-1332(+)	2346	0.0426972	1	0.0417985	No
NC_006055.1:595863-595940(-)	62637	1.13999	4	0.0287974	No
NC_006055.1:596033-596126(-)	36621	0.666502	1	0.486498	No
NC_006055.1:616279-616356(-)	33303	0.606115	3	0.0237236	No
NC_006055.1:465458-468194(-)	6306831	114.784	62	1	No
NC_006055.1:326733-326807(+)	1079166	19.6408	19	0.587745	No
NC_006055.1:595947-596023(-)	26720	0.486304	1	0.385105	No
NC_006055.1:191140-191216(+)	26267	0.478059	3	0.0127788	No
NC_006055.1:193580-196316(+)	6287895	114.44	51	1	No
NC_006055.1:441480-441569(-)	36237	0.659513	4	0.00467908	No
NC_006055.1:191845-193373(+)	3235499	58.8861	27	0.999999	No
NC_006055.1:468401-469929(-)	3216041	58.5319	23	1	No
NC_006055.1:191497-191581(+)	2173	0.0395486	1	0.0387768	No
NC_006055.1:562654-562744(-)	472810	8.60514	2	0.998241	No
x

## Sheet: Table 6. Transition bias
E. coli		Replicate_1	Replicate_2	Replicate_3	Total		Without C-->U:	E. coli		Replicate_1	Replicate_2	Replicate_3	Total
	Transitions	4.6611e-06	5.14337e-06	4.58655e-06	4.8022e-06				Transitions	1.52147e-06	1.66966e-06	1.69601e-06	1.62658e-06
	Transversions	1.15001e-06	8.78767e-07	1.08184e-06	1.03622e-06				Transversions	1.15001e-06	8.78767e-07	1.08184e-06	1.03622e-06
B. subtilis		Replicate_1	Replicate_2	Replicate_3				B. subtilis		Replicate_1	Replicate_2	Replicate_3
	Transitions	4.60633e-06	5.03192e-06	4.82997e-06	4.82853e-06				Transitions	1.69029e-06	1.91398e-06	2.1147e-06	1.88093e-06
	Transversions	9.5149e-07	1.0033e-06	9.55844e-07	9.73035e-07				Transversions	9.5149e-07	1.0033e-06	9.55844e-07	9.73035e-07
A. tumefaciens		Replicate_1	Replicate_2	Replicate_3				A. tumefaciens		Replicate_1	Replicate_2	Replicate_3
	Transitions	6.43629e-06	5.65083e-06	6.13248e-06	6.09489e-06				Transitions	2.67201e-06	2.27109e-06	2.50327e-06	2.49352e-06
	Transversions	1.29087e-06	9.14896e-07	1.27897e-06	1.16884e-06				Transversions	1.29087e-06	9.14896e-07	1.27897e-06	1.16884e-06
M. florum		Replicate_1	Replicate_2	Replicate_3				M. florum		Replicate_1	Replicate_2	Replicate_3
	Transitions	1.6086e-05	1.58233e-05	1.64833e-05	1.60933e-05				Transitions	1.25927e-05	1.27468e-05	1.31506e-05	1.27777e-05
	Transversions	2.33166e-06	2.12985e-06	1.68135e-06	2.10866e-06				Transversions	2.33166e-06	2.12985e-06	1.68135e-06	2.10866e-06

## Sheet: Table 7. Characterize errors
E. coli			Observations:	Syn	Nsyn	Nonsense		Expectations:	Syn	Nsyn	Nonsense
	%syn	E. coli		0.401832	0.5625	0.0356675			0.343501	0.597899	0.0562009
	%nsy	B. subtilis		0.327563	0.616856	0.0514806			0.318601	0.616301	0.0614989
	%PTC	A. tumefaciens		0.406814	0.563627	0.0295591			0.3676	0.591698	0.0386022
		M. florum		0.175755	0.792699	0.0236593			0.241201	0.7058	0.0484993
B. subtilis
	%syn
	%nsy
	%PTC
A. tumefaciens
	%syn
	%nsy
	%PTC
M. florum
	%syn
	%nsy
	%PTC

## Sheet: Table 8 . ncRNA error rates
E. coli		# 0f errors	# of sites assayed	error rate
tRNA	sample_1	23	1325645	1.735e-05
	sample_2	18	1333614	1.34972e-05
	sample_3	7	764250	9.15931e-06
rRNA	sample_1	7	436488	1.60371e-05
	sample_2	0	41819	0
	sample_3	0	0	NA
others	sample_1	89	17815191	4.99574e-06
	sample_2	67	15597275	4.29562e-06
	sample_3	46	12339200	3.72796e-06
B. subtilis
tRNA	sample_1	42	1733591	2.42272e-05
	sample_2	121	2556590	4.73287e-05
	sample_3	47	1594528	2.94758e-05
rRNA	sample_1	39	4397279	8.86912e-06
	sample_2	3	609424	4.92268e-06
	sample_3	3	842436	3.5611e-06
others	sample_1	149	24372823	6.11337e-06
	sample_2	142	25195856	5.63585e-06
	sample_3	109	18783857	5.80286e-06
A. tumefaciens
tRNA	sample_1	6	1761033	3.40709e-06
	sample_2	6	1050076	5.71387e-06
	sample_3	4	760314	5.26098e-06
rRNA	sample_1	12	1345170	8.92081e-06
	sample_2	9	974868	9.23202e-06
	sample_3	2	852103	2.34713e-06
others	sample_1	46	7042603	6.53168e-06
	sample_2	41	6760851	6.06433e-06
	sample_3	22	5447964	4.03821e-06
M. florum
tRNA	sample_1	158	2930717	5.39117e-05
	sample_2	50	1454604	3.43736e-05
	sample_3	51	1326175	3.84565e-05
rRNA	sample_1	163	19105803	8.53144e-06
	sample_2	136	11528317	1.1797e-05
	sample_3	71	9257398	7.66954e-06
others	sample_1	0	0	NA
	sample_2	0	0	NA
	sample_3	0	0	NA
